# Supplementary material for: British Thoracic Society guideline on pulmonary rehabilitation in adults: accredited by NICE
Source: HighWire-hosted journal article supplement (doi:10.1136/thoraxjnl-2013-203808), 2013-07-23
Supplement: thoraxjnl-2013-203808supp_appendices.pdf [file thoraxjnl-2013-203808supp_appendices.pdf]

## **BTS Guideline on Pulmonary Rehabilitation in adults**

### **Web appendix 1: Clinical Questions**

- **Do patients with COPD who continue to smoke get similar benefit and have similar completion rates from pulmonary rehabilitation compared with ex-smokers? Should they be referred?**
- **Do patients with COPD with chronic respiratory failure get similar benefit from pulmonary rehabilitation compared with those who do not have chronic respiratory failure and is it safe? Should they be referred?**
- **Do patients with COPD with co-existent cardiovascular disease get similar benefit from pulmonary rehabilitation compared with those who do not have cardiovascular disease and is it safe? Should they be referred?**
- **Do patients with COPD with co-existent anxiety and depression get similar benefit from pulmonary rehabilitation compared with those who are not anxious or depressed? Should they be referred?**
- **Do patients with COPD who are MRC grade 2 breathless get similar benefit from pulmonary rehabilitation compared with those with greater breathlessness? Should they be referred?**
- **Do patients with COPD who are MRC grade 5 breathless get similar benefit from pulmonary rehabilitation compared with those with MRC grade 3-4? Should they be referred?**
- **Role of pharmacological agents at referral to pulmonary rehabilitation.**
- **Is once weekly supervised pulmonary rehabilitation as effective at improving exercise performance and health status in patients with chronic respiratory disease when compared with a twice (or thrice) weekly supervised programme?**

- Are pulmonary rehabilitation programmes that are less than 6 weeks in duration equally effective at improving exercise performance and health status in patients with chronic respiratory disease when compared with programmes that are longer or equal to 6 weeks in duration?
- Are rolling programmes of pulmonary rehabilitation equally effective as stand-alone programmes for patients with chronic respiratory disease?
- Are Pulmonary rehabilitation programmes that include resistance training and aerobic training more effective at improving exercise performance in patients with chronic respiratory disease when compared with aerobic training alone.
- Are Pulmonary rehabilitation programmes that include interval training more effective at improving exercise performance in patients with chronic respiratory disease when compared with continuous aerobic training?
- Do pulmonary rehabilitation programmes that include personal goal setting achieve greater improvements in functioning when compared with programmes that do not include personal goal setting?
- In patients with COPD does face to face twice-weekly supervision of pulmonary rehabilitation lead to greater improvements in walk test distance and dyspnoea scores than supervision provided by internet support /manual etc ?
- Does Pulmonary Rehabilitation within one month of discharge improve outcomes in COPD patients hospitalised for acute exacerbations of COPD compared with usual care?
- What is the completion rate of Pulmonary Rehabilitation within one month of hospital discharge in unselected patients compared with elective pulmonary rehabilitation?

- Does a cognitive-behavioural component delivered before commencing rehabilitation improve compliance (adherence / completion) of pulmonary rehabilitation?
- What is the impact of a pulmonary rehabilitation programme on the exercise, physical activity, muscle strength, health status, psychological state, and nutritional status of participants compared with usual care without pulmonary rehabilitation?
- What is the impact of a pulmonary rehabilitation programme on survival of participants compared with usual care without pulmonary rehabilitation?
- In patients with COPD does inspiratory muscle training plus pulmonary rehabilitation lead to greater improvements in exercise tolerance and dyspnoea scores than pulmonary rehabilitation alone?
- In patients with COPD does therapy with hormones / drug / nutraceuticals plus pulmonary rehabilitation lead to greater improvements in walk test distance and dyspnoea scores than pulmonary rehabilitation alone?
- In patients with COPD does non-invasive ventilation (NIV) DURING exercise of pulmonary rehabilitation lead to greater improvements in walk test distance and dyspnoea scores than pulmonary rehabilitation alone in those with type II respiratory failure?
- In patients with COPD does neuromuscular electrical stimulation (NMES) plus pulmonary rehabilitation lead to greater improvements in walk test distance and dyspnoea scores than pulmonary rehabilitation alone?
- In patients with COPD and exercise desaturation does the acute administration of medical gases DURING the exercise component of pulmonary rehabilitation lead to

**greater improvements in walk test distance and dyspnoea scores than pulmonary rehabilitation in room air?**

- **Should pulmonary rehabilitation be repeated? If so, when?**
- **Should maintenance “exercise” be offered following their first pulmonary rehabilitation**
- **Does pulmonary rehabilitation lead to improvement in exercise capacity, health status, breathlessness in adult patients with non-CF bronchiectasis compared with patients with non-CF bronchiectasis that do not undergo rehabilitation?**
- **Does pulmonary rehabilitation lead to improvement in exercise capacity, health status, breathlessness in adult patients with interstitial lung disease compared with patients with interstitial lung disease that do not undergo rehabilitation?**
- **Does pulmonary rehabilitation lead to improvement in exercise capacity, health status, breathlessness in adult patients with asthma compared with patients with asthma that do not undergo rehabilitation?**

## **b) Web appendix: Literature Search details**

Sources to be searched for the guidelines;

Cochrane Database of Systematic Reviews (CDSR)  
Database of Abstracts of Reviews of Effects (DARE)  
MEDLINE  
EMBASE

Dates searched: 1980 onwards

All study types

English language only

Four search strategies used- COPD, bronchiectasis, restrictive lung disease, and asthma.

### **1.COPD search**

#### **Cochrane Library (includes CDSR and DARE)**

<http://www.thecochranelibrary.com>

Searched online 05/08/11

#1 MeSH descriptor Pulmonary Disease, Chronic Obstructive explode all trees 1669

#2 (COPD or "chronic obstructive pulmonary disease" or "pulmonary disease, chronic obstructive"):ti,ab 6357

#3 ("chronic obstructive airway\* disease" or "chronic airflow limitation"):ti,ab 132

#4 ("chronic obstructive lung disease" or "lung disease, chronic obstructive"):ti,ab 786

#5 (#1 OR #2 OR #3 OR #4) 7042

#6 (pulmonary near/3 rehabilitat\*):ti,ab 453

#7 (#5 AND #6) 365

#8 MeSH descriptor Pulmonary Disease, Chronic Obstructive, this term only with qualifier: RH 235

#9 (#7 OR #8) 481

#10 (#7 OR #8), from 1980 to 2011 30

Of 30 results 9 were from Cochrane Database of Systematic Reviews (CDSR) and 21 from Database of Reviews of Effects (DARE).

#### **MEDLINE**

Searched 05/08/11 via OVID interface

Ovid MEDLINE(R) <1948 to July Week 4 2011>

1 exp Pulmonary Disease, Chronic Obstructive/ (16419)

2 (COPD or "chronic obstructive pulmonary disease" or "pulmonary disease, chronic obstructive").ti,ab. (25628)

3 ("chronic obstructive airway\$ disease" or "chronic airflow limitation").ti,ab. (915)

- 4 ("chronic obstructive lung disease" or "lung disease, chronic obstructive").ti,ab. (2494)
- 5 1 or 2 or 3 or 4 (31618)
- 6 (pulmonary adj3 rehabilitat\$).ti,ab. (1507)
- 7 5 and 6 (1023)
- 8 \*Pulmonary Disease, Chronic Obstructive/rh [Rehabilitation] (735)
- 9 7 or 8 (1343)
- 10 limit 9 to (english language and yr="1980 - 2011") (1127)

## EMBASE

Searched 05/08/11 via OVID interface

Embase <1980 to 2011 Week 30>

- 1 exp chronic obstructive lung disease/ (51618)
- 2 (COPD or "chronic obstructive pulmonary disease" or "pulmonary disease, chronic obstructive").ti,ab. (32905)
- 3 ("chronic obstructive airway\$ disease" or "chronic airflow limitation").ti,ab. (1116)
- 4 ("chronic obstructive lung disease" or "lung disease, chronic obstructive").ti,ab. (2956)
- 5 1 or 2 or 3 or 4 (57587)
- 6 (pulmonary adj3 rehabilitat\$).ti,ab. (2037)
- 7 5 and 6 (1508)
- 8 \*chronic obstructive lung disease/rh [Rehabilitation] (1886)
- 9 7 or 8 (2581)
- 10 limit 9 to (english language and yr="1980 - 2011") (1931)

## Results

| Database                                    | Results | After deduplication | Custom 4 field                                               |
|---------------------------------------------|---------|---------------------|--------------------------------------------------------------|
| Cochrane Database of Systematic Reviews     | 9       | 9                   | main search Cochrane Database of Systematic Reviews 05/08/11 |
| Database of Abstracts of Reviews of Effects | 21      | 21                  | main search DARE (non-Cochrane systematic reviews) 05/08/11  |
| MEDLINE                                     | 1343    | 1085                | main search Medline 05/08/11                                 |
| EMBASE                                      | 1931    | 972                 | main search Embase 05/08/11                                  |

|              |             |             |  |
|--------------|-------------|-------------|--|
| <b>Total</b> | <b>3304</b> | <b>2087</b> |  |
|--------------|-------------|-------------|--|

2087 results saved to Endnote X3 library bts pulmonary rehab.enl

## 2. Bronchiectasis search

### Cochrane Library (includes CDSR and DARE)

<http://www.thecochranelibrary.com>

Searched online 11/08/11

#1 (pulmonary near/3 rehabilitat\*):ti,ab 453

#2 MeSH descriptor Bronchiectasis explode all trees 124

#3 bronchiectasis:ti,ab 240

#4 "kartagener syndrome":ti,ab 0

#5 (#2 OR #3 OR #4) 275

#6 (#1 AND #5), from 1980 to 2011 7

Of 7 results in entire Cochrane Library 1 was from Cochrane Database of Systematic Reviews (CDSR) and none from Database of Reviews of Effects (DARE).

### MEDLINE

Searched 11/08/11 via OVID interface

Ovid MEDLINE(R) <1948 to August Week 1 2011>

1 (pulmonary adj3 rehabilitat\$).ti,ab. (1510)

2 exp Bronchiectasis/ (6778)

3 bronchiectasis.ti,ab. (5128)

4 "kartagener syndrome".ti,ab. (170)

5 2 or 3 or 4 (8706)

6 1 and 5 (17)

7 limit 6 to (english language and yr="1980 - 2011") (13)

### EMBASE

Searched 11/08/11 via OVID interface

Embase <1980 to 2011 Week 31>

1 (pulmonary adj3 rehabilitat\$).ti,ab. (2039)

2 exp Bronchiectasis/ (10031)

3 bronchiectasis.ti,ab. (6097)

4 "kartagener syndrome".ti,ab. (198)

5 2 or 3 or 4 (11405)

6 1 and 5 (37)

7 limit 6 to (english language and yr="1980 - 2011") (30)

## Results

| Database                                    | Results   | After deduplication | Custom 4 field                        |
|---------------------------------------------|-----------|---------------------|---------------------------------------|
| Cochrane Database of Systematic Reviews     | 1         | 1                   | Q9 bronchiectasis<br>CDSR 12/08/11    |
| Database of Abstracts of Reviews of Effects | 0         | 0                   |                                       |
| MEDLINE                                     | 13        | 12                  | Q9 bronchiectasis<br>medline 12/08/11 |
| EMBASE                                      | 30        | 16                  | Q9 bronchiectasis<br>embase 12/08/11  |
| <b>Total</b>                                | <b>44</b> | <b>29</b>           |                                       |

29 results saved to Endnote X3 library bts pulmonary rehab.enl were not deduplicated against the results of the COPD, restrictive lung disease or asthma searches.

### 3. Restrictive lung disease search

#### Cochrane Library (includes CDSR and DARE)

<http://www.thecochranelibrary.com>

Searched online 11/08/11

#1 (pulmonary near/3 rehabilitat\*):ti,ab 453

#2 MeSH descriptor Idiopathic Interstitial Pneumonias explode all trees 13

#3 "idiopathic pulmonary fibrosis":ti,ab 127

#4 "Idiopathic interstitial pneumonia":ti,ab 7

#5 MeSH descriptor Sarcoidosis explode all trees 105

#6 sarcoidosis:ti,ab 168

#7 MeSH descriptor Pulmonary Eosinophilia explode all trees 23

#8 "Eosinophilic pneumonia":ti,ab 1

#9 MeSH descriptor Lymphangiomyomatosis explode all trees 4

#10 lymphangiomyomatosis\*:ti,ab 4

#11 MeSH descriptor Histiocytosis, Langerhans-Cell explode all trees 10

#12 "pulmonary Langerhans cell histiocytosis":ti,ab 1

#13 MeSH descriptor Pulmonary Alveolar Proteinosis explode all trees 2



#14 "pulmonary alveolar proteinosis":ti,ab 3

#15 (#2 OR #3 OR #4 OR #5 OR #6 OR #7 OR #8 OR #9 OR #10 OR #11 OR #12 OR #13 OR #14) 350

#16 (#1 AND #15), from 1980 to 2011 7

Of 7 results in entire Cochrane Library none were from Cochrane Database of Systematic Reviews (CDSR) or from Database of Reviews of Effects (DARE).

### **MEDLINE**

Searched 11/08/11 via OVID interface

Ovid MEDLINE(R) <1948 to August Week 1 2011>

- 1 (pulmonary adj3 rehabilitat\$).ti,ab. (1510)
- 2 exp Idiopathic Interstitial Pneumonias/ (1240)
- 3 "idiopathic pulmonary fibros\$".ti,ab. (2749)
- 4 "Idiopathic interstitial pneumonia\$".ti,ab. (617)
- 5 exp Sarcoidosis/ (19537)
- 6 sarcoidosis.ti,ab. (16735)
- 7 exp Pulmonary Eosinophilia/ (2141)
- 8 "Eosinophilic pneumonia\$".ti,ab. (796)
- 9 exp Lymphangioliomyomatosis/ (712)
- 10 lymphangioliomyomatosis\$.ti,ab. (832)
- 11 exp Histiocytosis, Langerhans-Cell/ (6349)
- 12 "pulmonary Langerhans\$ cell histiocytosis\$".ti,ab. (159)
- 13 exp Pulmonary Alveolar Proteinosis/ (1181)
- 14 "pulmonary alveolar proteinosis\$".ti,ab. (921)
- 15 2 or 3 or 4 or 5 or 6 or 7 or 8 or 9 or 10 or 11 or 12 or 13 or 14 (35891)
- 16 1 and 15 (16)
- 17 limit 16 to (english language and yr="1980 - 2011") (11)

### **EMBASE**

Searched 11/08/11 via OVID interface

Embase <1980 to 2011 Week 31>

- 1 (pulmonary adj3 rehabilitat\$).ti,ab. (2039)
- 2 exp interstitial pneumonia/ (7074)
- 3 "idiopathic pulmonary fibros\$".ti,ab. (3350)
- 4 "Idiopathic interstitial pneumonia\$".ti,ab. (768)
- 5 exp Sarcoidosis/ (22878)
- 6 sarcoidosis.ti,ab. (18865)
- 7 exp Loeffler pneumonia/ (2462)
- 8 "Eosinophilic pneumonia\$".ti,ab. (977)
- 9 exp lymphangioliomyomatosis/ (1022)

- 10 lymphangioliomyomatosis\$.ti,ab. (980)
- 11 exp histiocytosis X/ (4354)
- 12 "pulmonary Langerhans\$ cell histiocytosis\$.ti,ab. (195)
- 13 exp lung alveolus proteinosis/ (1503)
- 14 "pulmonary alveolar proteinosis\$.ti,ab. (998)
- 15 2 or 3 or 4 or 5 or 6 or 7 or 8 or 9 or 10 or 11 or 12 or 13 or 14 (44441)
- 16 1 and 15 (24)
- 17 limit 16 to (english language and yr="1980 - 2011") (18)

**Results**

| Database                                    | Results   | After deduplication | Custom 4 field                                  |
|---------------------------------------------|-----------|---------------------|-------------------------------------------------|
| Cochrane Database of Systematic Reviews     | 0         | 0                   |                                                 |
| Database of Abstracts of Reviews of Effects | 0         | 0                   |                                                 |
| MEDLINE                                     | 11        | 11                  | Q9 restrictive lung disease medline<br>12/08/11 |
| EMBASE                                      | 18        | 8                   | Q9 restrictive lung disease embase<br>12/08/11  |
| <b>Total</b>                                | <b>29</b> | <b>19</b>           |                                                 |

19 results saved to Endnote X3 library bts pulmonary rehab.enl were not deduplicated against the results of the COPD, bronchiectasis or asthma searches.

**4. Asthma search**

**Cochrane Library (includes CDSR and DARE)**

<http://www.thecochranelibrary.com>

Searched online 11/08/11

#1 (pulmonary near/3 rehabilitat\*):ti,ab 453

#2 MeSH descriptor Asthma explode all trees 8569

#3 asthma\*:ti,ab 17864

#4 (#2 OR #3) 18448

#5 (#1 AND #4), from 1980 to 2011 14

Of 14 results in entire Cochrane Library none were from Cochrane Database of Systematic Reviews (CDSR) and 1 was from Database of Reviews of Effects (DARE).

### MEDLINE

Searched 11/08/11 via OVID interface

Ovid MEDLINE(R) <1948 to August Week 1 2011>

- 1 (pulmonary adj3 rehabilitat\$.ti,ab. (1510)
- 2 exp Asthma/ (96007)
- 3 asthma\$.ti,ab. (101127)
- 4 2 or 3 (118985)
- 5 1 and 4 (73)
- 6 limit 5 to (english language and yr="1980 - 2011") (49)

### EMBASE

Searched 11/08/11 via OVID interface

Embase <1980 to 2011 Week 31>

- 1 (pulmonary adj3 rehabilitat\$.ti,ab. (2039)
- 2 exp Asthma/ (147677)
- 3 asthma\$.ti,ab. (124740)
- 4 2 or 3 (165715)
- 5 1 and 4 (122)
- 6 limit 5 to (english language and yr="1980 - 2011") (89)

### Results

| Database                                    | Results | After deduplication | Custom 4 field                |
|---------------------------------------------|---------|---------------------|-------------------------------|
| Cochrane Database of Systematic Reviews     | 0       | 0                   |                               |
| Database of Abstracts of Reviews of Effects | 1       | 1                   | Q9 asthma DARE<br>12/08/11    |
| MEDLINE                                     | 49      | 47                  | Q9 asthma medline<br>12/08/11 |
| EMBASE                                      | 89      | 44                  | Q9 asthma embase              |

|              |            |           |          |
|--------------|------------|-----------|----------|
|              |            |           | 12/08/11 |
| <b>Total</b> | <b>139</b> | <b>92</b> |          |

92 results saved to Endnote X3 library bts pulmonary rehab.enl were not deduplicated against the results of the COPD, bronchiectasis or restrictive lung disease searches.



## **BTS Guideline on Pulmonary Rehabilitation in adults**

### **Web appendix 3: Evidence tables**

The evidence tables can be found as an online appendix at the British Thoracic Society website. See separate document. Abbreviations for the evidence tables are listed in web appendix 4.

**Title: The British Thoracic Society Guideline on Pulmonary Rehabilitation in Adults**

**Short Title: BTS Pulmonary Rehabilitation Guideline**

### **Web Appendix 3 - EVIDENCE TABLES**

**Correspondence to:**

The British Thoracic Society

17, Doughty Street,

London.

WC1N 2PL

**Telephone:** ++ 44 (0) 20 7831 8778

**Fax:** ++ 44 (0) 20 7831 8766

**Email:** [bts@brit-thoracic.org.uk](mailto:bts@brit-thoracic.org.uk)

**iii) Web appendix: Evidence tables**



| Bibliographic citation                                                                                                                             | Study type | Ev lev | Number patients | Patient characteristics                                                                                                                                                                          | Intervention                                                                                              | Comparison | Length of follow up                     | Outcome measures                                                                                                                | Effect size                                                                                                                                                                                                                                                                                                                                                                                                                                                                                                                              | Source of funding                                       |
|----------------------------------------------------------------------------------------------------------------------------------------------------|------------|--------|-----------------|--------------------------------------------------------------------------------------------------------------------------------------------------------------------------------------------------|-----------------------------------------------------------------------------------------------------------|------------|-----------------------------------------|---------------------------------------------------------------------------------------------------------------------------------|------------------------------------------------------------------------------------------------------------------------------------------------------------------------------------------------------------------------------------------------------------------------------------------------------------------------------------------------------------------------------------------------------------------------------------------------------------------------------------------------------------------------------------------|---------------------------------------------------------|
| Ambrosino N, Foglio K, Balzano G, <i>et. al</i> ; Tiotropium Multicentric Italian Study Group. Int J Chron Obstruct Pulmon Dis. 2008; 3(4):771-80. | RCT        | 1-     | 234             | 234 (196 male) patients with COPD – FEV1 1.1(0.4)L; 41(13)% predicted randomised to tiotropium or placebo before pulmonary rehabilitation. 87 tiotropium and 90 placebo patients completed study | Tiotropium<br><br>All subjects had 8 week outpatient pulmonary rehabilitation (3 exercise sessions/week). | Placebo    | 12 weeks after pulmonary rehabilitation | Comparison of group response tiotropium vs. placebo. Outcome measures exercise capacity (6MWT), dyspnoea (TDI) and HRQOL (SGRQ) | Both groups improved 6MWD after pulmonary rehabilitation (27m tiotropium vs. 33m placebo) but no difference between the groups at end of pulmonary rehabilitation or 12 weeks post-pulmonary rehabilitation. Both groups improved TDI after pulmonary rehabilitation (3.6 tiotropium vs. 2.3 placebo) with larger increase in tiotropium (p<0.001). both groups improved SGRQ after pulmonary rehabilitation (-8.1 tiotropium vs. -6.1 placebo) maintained after 12 week follow-up but no difference between groups at either time point | Boehringer Ingelheim and Pfizer Pharmaceuticals (Italy) |

Comments: Patients with COPD improve walking distance, dyspnoea and HRQOL with pulmonary rehabilitation. Tiotropium enhances improvement in breathlessness but not walking distance or HRQOL. The randomisation process is unclear (and exact “1:1” raises concern). There is no mention of allocation concealment or blinding methods. The difference in medication use at trial entry meant far more of the placebo arm had medication stopped (ICS/anticholinergics). An ITT analysis is reported in the methods but not undertaken – analysis is neither ITT nor per-protocol and numbers vary by analysis.

| Bibliographic citation                     | Study type | Ev lev | Number patients | Patient characteristics       | Intervention             | Comparison   | Length of follow up | Outcome measures                 | Effect size                        | Source of funding |
|--------------------------------------------|------------|--------|-----------------|-------------------------------|--------------------------|--------------|---------------------|----------------------------------|------------------------------------|-------------------|
| Arnold R, Ranchor AV, Koëter GH, <i>et</i> | Cohort     | 2-     | 39              | COPD, age 40-80, FEV1<70%, no | Pulmonary rehabilitation | Pre and post | mean duration 20    | Rand 36 health survey, Cantril's | Improvements in overall quality of | Not stated        |

*al. Changes in personal control as a predictor of quality of life after pulmonary rehabilitation. Patient Education and Counselling. 2006; 61: 99–108.*

Comments:

**Bibliographic citation**  
 Baldi S, Aquilani R, Pinna GD, *et al.* Fat-free mass change after nutritional rehabilitation in weight losing COPD: role of insulin, C-reactive protein and tissue hypoxia. *Int J Chron Obstruct Pulmon Dis.* 2010; 5: 29-39.

psychiatric illness in previous year

weeks

ladder, Mastery scale of Pearlin and Schooler, Self-efficacy scale of Sullivan et al

life and self-efficacy. No change in mastery, symptoms of COPD

| Bibliographic citation                                                                                                                                                                                                                    | Study type | Ev lev | Number patients                                                                   | Patient characteristics                                                 | Intervention                                                                                                                                             | Comparison                                                                     | Length of follow up | Outcome measures                                                                                                  | Effect size                                                                                                                                                                                                                                                                                                                                                                                       | Source of funding |
|-------------------------------------------------------------------------------------------------------------------------------------------------------------------------------------------------------------------------------------------|------------|--------|-----------------------------------------------------------------------------------|-------------------------------------------------------------------------|----------------------------------------------------------------------------------------------------------------------------------------------------------|--------------------------------------------------------------------------------|---------------------|-------------------------------------------------------------------------------------------------------------------|---------------------------------------------------------------------------------------------------------------------------------------------------------------------------------------------------------------------------------------------------------------------------------------------------------------------------------------------------------------------------------------------------|-------------------|
| Baldi S, Aquilani R, Pinna GD, <i>et al.</i> Fat-free mass change after nutritional rehabilitation in weight losing COPD: role of insulin, C-reactive protein and tissue hypoxia. <i>Int J Chron Obstruct Pulmon Dis.</i> 2010; 5: 29-39. | RCT        | 1-     | 28 subjects; Intervention group; 14 (13 analysed) Control group; 14 (13 analysed) | COPD diagnosis, >5% weight loss in previous 6 months, clinically stable | 4 grams of essential amino acid (EAA) solution x 2 / day with an initial 4 week inpatient and then 8 week outpatient pulmonary rehabilitation programme. | 4 week inpatient and then 8 week outpatient pulmonary rehabilitation programme | 12 weeks.           | Body weight, FFM Change in FFM in contrast to fasting insulin plasma levels, (CRP) and oxygen extraction tension. | Body weight; EAA group average increase of 3.8kg +/- 2.6kg (p 0.0002) and – 0.1kg +/- 1.1kg (p 0.81) in Control group. FFM; EAA group average increase of 1.5kg +/- 2.6kg (p 0.05) and –0.1kg +/- 2.3kg in Control group (p 0.94). In EAA group FFM significantly related to fasting insulin (r2 = 0.68, p <0.0005), CRP (r2 = 0.46, p <0.01) and oxygen extraction tension (r2 = 0.46, p <0.01). | Not stated        |

Comments: No details of randomising process. No details of compliance regarding home based pulmonary rehabilitation programme. Results not ITT.

| Bibliographic citation                                                                                                         | Study type                                 | Ev lev | Number patients   | Patient characteristics | Intervention                                                                         | Comparison                     | Length of follow up | Outcome measures                                        | Effect size                                                                                           | Source of funding                                                                                             |
|--------------------------------------------------------------------------------------------------------------------------------|--------------------------------------------|--------|-------------------|-------------------------|--------------------------------------------------------------------------------------|--------------------------------|---------------------|---------------------------------------------------------|-------------------------------------------------------------------------------------------------------|---------------------------------------------------------------------------------------------------------------|
| Bernard S, Whitton F, Leblanc P, <i>et al.</i> Aerobic and strength training in patients with COPD. <i>Am J Resp Crit Care</i> | RT<br>Reviewed in O'Shea systematic review | 1+     | 45 (36 completed) | Mod – severe COPD       | 12 week Combination of aerobic training and strength training X 3 sessions per week. | 12 week aerobic training alone | 12 weeks            | Peripheral muscle strength and composition, 6MWD, HRQOL | Small non-significant trend towards improvement in walking distance. Sig increase in muscle strength. | Supported in part by the Fonds de la Recherche en Santé du Québec and by la Fondation J. D. Bégin, Université |

Med. 1999; 159(3):  
896 – 901.

No improvement  
in HRQOL

Laval.

Comments: No concealment of treatment allocation

| Bibliographic citation                                                                                                                                                                        | Study type              | Ev lev | Number patients                                                     | Patient characteristics                                                                                                                                                                                                                                                                                                               | Intervention                        | Comparison                           | Length of follow up | Outcome measures                                                                                                                                                                                                                                                                                                                                 | Effect size                                                            | Source of funding                                                                          |
|-----------------------------------------------------------------------------------------------------------------------------------------------------------------------------------------------|-------------------------|--------|---------------------------------------------------------------------|---------------------------------------------------------------------------------------------------------------------------------------------------------------------------------------------------------------------------------------------------------------------------------------------------------------------------------------|-------------------------------------|--------------------------------------|---------------------|--------------------------------------------------------------------------------------------------------------------------------------------------------------------------------------------------------------------------------------------------------------------------------------------------------------------------------------------------|------------------------------------------------------------------------|--------------------------------------------------------------------------------------------|
| Berry MJ, Rejeski WJ, Miller ME, <i>et al.</i><br>A lifestyle activity intervention in patients with chronic obstructive pulmonary disease. <i>Respiratory Medicine</i> . 2010; 104: 829-839. | RCT<br>(single blinded) | 1-     | 176 randomised:<br><br>intervention group= 87<br>control group= 89. | FEV1/FVC ≤70%,<br>FEV1 ≥20% pred.<br>Reported difficulty in performing at least one of several daily activities (listed in paper) due to dyspnoea.<br>Number of exclusions including severe CV disease, no active treatment for cancer, not participated in a pulmonary rehabilitation or exercise programme in the previous 3 months | Lifestyle activity programme (LAP). | Traditional exercise treatment (TET) | 12 months           | <b>Primary outcome;</b> Moderate physical activity (kcal / week). <b>Secondary outcomes;</b> Physical function (6 MWT, stair climb time, Short physical performance battery (SPPB), Self-reported disability, Health related QOL (CRDQ, CESD, SF-36).<br>Exercise capacity via VO2 peak and total time during graded exercise test on treadmill. | No significant 'between group' differences seen at 12 month follow up. | Supported grants HL 53755, AG 21332 and M01 RR07122 from the National Institutes of Health |

Comments: Well written although appears to have lost power. Single blinded. Results not ITT. Study patients pre assessed prior to randomisation to select most motivated to complete self-monitoring over 12 months.

| Bibliographic citation                                                                                                                                                                                   | Study type | Ev lev | Number patients                                                   | Patient characteristics                    | Intervention                                                                                                                                        | Comparison                                                               | Length of follow up | Outcome measures                             | Effect size                                                                                      | Source of funding |
|----------------------------------------------------------------------------------------------------------------------------------------------------------------------------------------------------------|------------|--------|-------------------------------------------------------------------|--------------------------------------------|-----------------------------------------------------------------------------------------------------------------------------------------------------|--------------------------------------------------------------------------|---------------------|----------------------------------------------|--------------------------------------------------------------------------------------------------|-------------------|
| Berry MJ, Adair NE, Sevensky KS <i>et al.</i><br>Inspiratory Muscle Training and Whole Body Reconditioning in chronic obstructive pulmonary disease. <i>Am J Respir Crit Care Med</i> . 1996; 153:1812-6 | RCT        | 1+     | 25 total: 8 IMT & GER, 9 GER, 8 flexibility exercise and sham IMT | Mild to moderate COPD by usual definitions | GER: individualised strength and aerobic exercise plan thrice weekly over 12 weeks; IMT: threshold trainer at increasing % to 80% P <sub>Imax</sub> | Flexibility exercises, breathing exercises, IMT at 15% P <sub>Imax</sub> | End of intervention | Pimax; CPEX outcomes; 12 MWT; dyspnoea score | 12 MWT increases of 400 ft in both active arms. No change in dyspnoea scores or CPEX parameters. | Charity           |

Comments: 2 drop-outs from this small study, similar baseline characteristics. Blinding described but not randomisation process. Analyses strategy appropriate.

| Bibliographic citation | Study type | Ev lev | Number patients        | Patient characteristics | Intervention | Comparison      | Length of follow up | Outcome measures    | Effect size    | Source of funding  |
|------------------------|------------|--------|------------------------|-------------------------|--------------|-----------------|---------------------|---------------------|----------------|--------------------|
| Borg-Silva A,          | RCT        | 1-     | 16 patients (10 male); | Stable COPD,            | 2g oral L-   | Saline solution | 6 weeks             | Nutritional status, | Blood lactate, | L-carnitine partly |

**Baldissera V, Sampaio LMM, et al. L-Carnitine as an ergogenic aid for patients with chronic obstructive pulmonary disease submitted to whole-body and respiratory muscle training programs. Brazilian Journal of Medical and Biological Research. 2006; 39: 465-474.**

8 in intervention group  
8 in control group.

FEV1 <50% / FVC <70% predicted and clinical history consistent with COPD

carnitine daily

“similar in colour, shape and taste” to L-carnitine. (Dose not specified).

exercise tolerance on a treadmill and 6MWD, blood lactate, heart rate, blood pressure, respiratory muscle strength.

blood pressure, oxygen saturation, heart rate at identical exercise levels lower in intervention group post training (p <0.05) Increases in PImax sig greater in intervention group v control (40+/- 14 vs. 14 +/- 5 cm H2O p<0.05). Increases in 6MWD sig improved in intervention group v control (87 +/- 30 vs. 34 +/- 29m p<0.05). Blood lactate concentration was sig lower in intervention group v control (1.6 +/- 0.7 vs. 2.3 +/- 0.7 Mm/L, p<0.05)

supplied by Sinto-farma as a donation and additional Sintofarma L-carnitine supplies funded by FAPESP (No. 00/00311-6)

**Comments: Randomising process poorly detailed, study workers not blinded, risk of recall bias when using diet history recall. Anthropometric measurements (Tricep skin fold (TSF) and mid-arm circumference (MAC)) carried out although not stated if same worker completed all measurements.**

| Bibliographic citation                                                                                                                                                            | Study type | Ev lev | Number patients             | Patient characteristics | Intervention                                                                          | Comparison                                                                                               | Length of follow up             | Outcome measures                                  | Effect size                                                                          | Source of funding |
|-----------------------------------------------------------------------------------------------------------------------------------------------------------------------------------|------------|--------|-----------------------------|-------------------------|---------------------------------------------------------------------------------------|----------------------------------------------------------------------------------------------------------|---------------------------------|---------------------------------------------------|--------------------------------------------------------------------------------------|-------------------|
| Borghi-Silva A, Mendes RG, Toledo AC, et al. Adjuncts to physical training of patients with severe COPD: Oxygen or noninvasive ventilation? Respiratory Care. 2010; 55(7):885-94. | RCT        | 1-     | 28 randomised; 24 completed | GOLD 3 or 4 COPD        | Supplemental oxygen via NS to keep SpO2>90% plus pulmonary rehabilitation for 6 weeks | Bi-level pressure support NIV (at maximum pressures tolerated) plus pulmonary rehabilitation for 6 weeks | End of pulmonary rehabilitation | 6MWT; SGRQ; CPEX; knee extension power /endurance | 74m additional increase (mean) in 6MWT; no difference in leg power, SGRQ, or VO2max. | Not stated        |
| <b>Comments: The study was small and not blinded.</b>                                                                                                                             |            |        |                             |                         |                                                                                       |                                                                                                          |                                 |                                                   |                                                                                      |                   |
| Bibliographic                                                                                                                                                                     | Study      | Ev lev | Number patients             | Patient                 | Intervention                                                                          | Comparison                                                                                               | Length of                       | Outcome measures                                  | Effect size                                                                          | Source of funding |

| <b>citation</b>                                                                                                                                                                     | <b>type</b>              |    |                                                                         | <b>characteristics</b>                |                                                                                    | <b>follow up</b>                                                                                              |         |                                                                                                                                                                                                  |                                                                                                                                                                                                                                            |                                 |
|-------------------------------------------------------------------------------------------------------------------------------------------------------------------------------------|--------------------------|----|-------------------------------------------------------------------------|---------------------------------------|------------------------------------------------------------------------------------|---------------------------------------------------------------------------------------------------------------|---------|--------------------------------------------------------------------------------------------------------------------------------------------------------------------------------------------------|--------------------------------------------------------------------------------------------------------------------------------------------------------------------------------------------------------------------------------------------|---------------------------------|
| <b>Broekhuizen R, Wouters EFM, Creutzberg EC, et al. Polyunsaturated fatty acids improve exercise capacity in chronic obstructive pulmonary disease. Thorax. 2005; 60: 376-382.</b> | RCT<br>double<br>blinded | 1- | Total; 102 Intervention; 51 (38 completed)<br>Placebo; 51(42 completed) | Clinically stable<br>GOLD stage II-IV | Polyunsaturated fatty acids<br>PUFA's; Dose 9 g / day (containing 1.04g EPA & DHA) | Placebo; 9g daily<br>containing 80% palm oil and 20% sunflower oil, iso-calorific as PUFA<br>intervention arm | 8 weeks | Body composition,<br>Functional capacity;<br>(Lung function, Incremental cycle ergometry test, submaximal cycle test, isokinetic quadriceps strength)<br>Inflammatory markers; CRP, (IL)-6, TNF. | Comparison of intervention vs. placebo; Peak load of incremental exercise test increased in PUFA group more than placebo; (mean diff +9.7W, p=0.009). PUFA group; Greater duration of constant work rate (mean diff +4.3 minutes, p 0.023) | Supported by Numico Research BV |

**Comments: No details of randomisation process. High drop-out rate of 25% in intervention group. Results not ITT.**

| <b>Bibliographic citation</b>                                                                                                                                                                                              | <b>Study type</b> | <b>Ev lev</b> | <b>Number patients</b>                    | <b>Patient characteristics</b>                                                                                                                                                                                                                                                                                                                                                           | <b>Intervention</b>                                                                                                                    | <b>Comparison</b>                                                                                                         | <b>Length of follow up</b> | <b>Outcome measures</b>                                                                                                                                 | <b>Effect size</b>                                                                                      | <b>Source of funding</b>                               |
|----------------------------------------------------------------------------------------------------------------------------------------------------------------------------------------------------------------------------|-------------------|---------------|-------------------------------------------|------------------------------------------------------------------------------------------------------------------------------------------------------------------------------------------------------------------------------------------------------------------------------------------------------------------------------------------------------------------------------------------|----------------------------------------------------------------------------------------------------------------------------------------|---------------------------------------------------------------------------------------------------------------------------|----------------------------|---------------------------------------------------------------------------------------------------------------------------------------------------------|---------------------------------------------------------------------------------------------------------|--------------------------------------------------------|
| <b>Broekhuizen R, Creutzberg EC, Weling-Scheepers CA et al. Optimizing oral nutritional drink supplementation in patients with chronic obstructive pulmonary disease. British Journal of Nutrition. 2005; 93: 965-971.</b> | Non-RCT           | 2-            | 39 subjects (group A; n=19 Group B; n=20) | Stable COPD, admitted consecutively to inpatient pulmonary rehabilitation unit and requiring nutritional support + at least one of following: BMI equal to or below 21 kg/m2<br>FFMI equal to or below 16 (men)/ 15 (women)<br>kg/m2<br>BMI equal to or below 25 kg/m2 & weight loss equal to or over 5% in 1 month or equal to or above 10% in 6 months prior to admission to pulmonary | Group A; x 3 125 ml cartons<br>Respifor supplement drinks daily (2380kJ, 20% energy from protein, 60% from carbohydrate, 20% from fat) | X 3 200 ml cartons<br>supplement drinks daily (3350 kJ, 22.3% energy from protein, 59.7% from carbohydrate, 18% from fat) | 8 weeks                    | Body composition (weight, FFM, fat mass (FM))<br>Lung function (FEV1)<br>Exercise capacity (incremental bicycle ergometry test)<br>Health status (SGRQ) | Between group results; Group A gained more weight than group B (3.3kg vs. 2.0 kg respectively; p 0.019) | Nutritional supplements provided by Numico Research BV |

rehabilitation  
centre.

**Comments:** Study carried out between years 1995-97 (group B), 2000-2002 (Group A) not detailed if hospital menu changed across this time period. Body composition obtained via bioelectrical impedance indicating a possible source of bias (no details of protocol used to minimise bias during measurements). No indication if trial was blinded. Study does not indicate amount of supplements consumed/ not consumed over 8 weeks.

| Bibliographic citation                                                                                                                                                                         | Study type | Ev lev | Number patients                                                                                                                     | Patient characteristics                                                                                                                                                                                                                       | Intervention                                                                                                                                                                                                                               | Comparison                                                                                                                                                                                                                                                         | Length of follow up  | Outcome measures     | Effect size                                                                                                                                       | Source of funding |
|------------------------------------------------------------------------------------------------------------------------------------------------------------------------------------------------|------------|--------|-------------------------------------------------------------------------------------------------------------------------------------|-----------------------------------------------------------------------------------------------------------------------------------------------------------------------------------------------------------------------------------------------|--------------------------------------------------------------------------------------------------------------------------------------------------------------------------------------------------------------------------------------------|--------------------------------------------------------------------------------------------------------------------------------------------------------------------------------------------------------------------------------------------------------------------|----------------------|----------------------|---------------------------------------------------------------------------------------------------------------------------------------------------|-------------------|
| Brooks D, Krip B, Mangovski-Alzamora S, Goldstein RS. The effect of post rehabilitation programmes among individuals with chronic obstructive pulmonary disease. Eur Resp J. 2002; 20(1):20-9. | RCT        | 1-     | Total 109 patients, 50 in intervention group and 59 in control group. Completers = 18 in intervention group and 23 in control group | Severe stable COPD <40%. Completion of pulmonary rehab programme Non-Smoker 49-85 years Exclusions – co morbidities impacting on exercise tolerance or cognitive functioning, non-compliance, non English speaking, NIV, living too far away. | Enhanced 12 m follow up, patients attended 2 hour monthly support sessions, supervised exercise and group discussion. Between these sessions patients had phone call from physiotherapist to discuss programme adherence and any concerns. | Conventional follow up had therapist contact every 3 months for 12 months where they were asked standardized questions re their illness and hospitalization s. Individuals encouraged to continue or resume exercise programmes and identify concerns to therapist | 3,6,9 ,and 12 months | 6MWD<br>CRDQ<br>SGRQ | No difference between either group after 1 year. Walking distances improved in study group at 6 months but went back to the same after 12 months. | Not stated        |

**Comments:** The authors conclude that all patients who completed a pulmonary rehabilitation programme had deteriorated by 12 months in terms of exercise tolerance and HRQOL. Poor post programme compliance appeared to be a factor which was not improved by an enhanced contact with Health Care Professionals. As there is no agreed definition of pulmonary rehabilitation maintenance, we need to establish the dose response of maintenance. Monthly group sessions in this study had limited effectiveness. Large drop out in both groups after 6 months. Conventional group received monthly visits at home.

| Bibliographic citation                                                                                                                                                                                           | Study type           | Ev lev | Number patients                                                         | Patient characteristics                                                             | Intervention                                      | Comparison            | Length of follow up | Outcome measures                                                              | Effect size                                                                                                                                              | Source of funding                                                  |
|------------------------------------------------------------------------------------------------------------------------------------------------------------------------------------------------------------------|----------------------|--------|-------------------------------------------------------------------------|-------------------------------------------------------------------------------------|---------------------------------------------------|-----------------------|---------------------|-------------------------------------------------------------------------------|----------------------------------------------------------------------------------------------------------------------------------------------------------|--------------------------------------------------------------------|
| Cambach W, Chadwick-Straver RV, Wagenaar RC, et al. The effects of a community-based pulmonary rehabilitation programme on exercise tolerance and quality of life: a randomised control trial. Eur Resp J. 1997; | RCT cross over study | 1 -    | 99 patients from 8 practices. 43 of the 66 who completed were asthmatic | Pulmonary rehabilitation conducted in local physiotherapy practices in Netherlands. | Pulmonary rehabilitation including drug treatment | Drug treatment alone. | 3 & 6 months        | Incremental cycle ergometer test; submaximal cycle ergometer test; 6MWT; CRDQ | 6MWD in asthma group alone: Pulmonary rehabilitation-Control (n=18) change in 6MWD at 3 months 63 (89)m Control – pulmonary rehabilitation n= 17 8 (63)m | National Health Insurance Council. Glaxo provided peak flow meters |

10:104-113.

Comments: Small numbers of asthma patients entered into study. Of 99 patients with asthma and COPD 66 completed. Patients were seen in small groups of 3 or 4 which may not be that representative of UK programmes and the rehabilitation was delivered for 90 minutes over a 3 month period, again not reflective of UK programmes. COPD patients in the pulmonary rehabilitation – Control arm showed little benefit compared with COPD patients in the control- pulmonary rehabilitation arm suggesting there may be problems with the programme itself, however differences for the asthma group were substantive in benefit of rehab. Randomisation was carried out within individual practices using block randomisation and sealed envelopes leading to possible randomisation bias due to localities. Diagnosis as to whether COPD or asthma made a posteriori. No power calculation.

| Bibliographic citation                                                                                                                                                                                                                  | Study type | Ev lev | Number patients | Patient characteristics                                                                                                                                                                                 | Intervention | Comparison                                                                           | Length of follow up | Outcome measures                                                                                                                                                                 | Effect size                                                                                                                                                                                                                                                                                             | Source of funding          |
|-----------------------------------------------------------------------------------------------------------------------------------------------------------------------------------------------------------------------------------------|------------|--------|-----------------|---------------------------------------------------------------------------------------------------------------------------------------------------------------------------------------------------------|--------------|--------------------------------------------------------------------------------------|---------------------|----------------------------------------------------------------------------------------------------------------------------------------------------------------------------------|---------------------------------------------------------------------------------------------------------------------------------------------------------------------------------------------------------------------------------------------------------------------------------------------------------|----------------------------|
| Carone M, Patessio A, Ambrosino N, et al. Efficacy of pulmonary rehabilitation in chronic respiratory failure (CRF) due to chronic obstructive pulmonary disease (COPD) : The Maugeri Study. <i>Resp Med.</i> 2007; 101 (12):2447-2453. | Cohort     | 3      | 1130            | 855 male and 192 female patients with COPD. 720 did not have CRF and 327 had CRF (defined as a PaO <sub>2</sub> <8kPa, PaCO <sub>2</sub> >6kPa or both). Mean FEV1 47% in non-CRF group and 39% in CRF. | All subjects | Subjects completed “tailored” inpatient pulmonary rehabilitation exercising 5 x/week | NA                  | Comparison of group response based on presence or absence of chronic respiratory failure. Outcome measures (6MWD), breathlessness (MRC score and TDI) and quality of life (SGRQ) | No significant difference in main outcomes when CRF and non-CRF patients are compared. 6MWD improvement 48(4) m CRF vs. 48(3) m non-CRF. MRC improvement 0.85(0.06) CRF vs. 0.73(0.03) non-CRF. TDI improvement 9.7(0.15) CRF vs. 3.8(0.1) non-CRF. SGRQ improvement 8.3(1.5) CRF vs. 10.1(0.6) non-CRF | Italian Ministry of Health |

Comments: COPD patients with CRF gained similar benefits from a not clearly defined pulmonary rehabilitation programme compared with patients without CRF

| Bibliographic citation                                                                                                                                                                               | Study type | Ev lev | Number patients   | Patient characteristics                                                                                        | Intervention                  | Comparison | Length of follow up                                 | Outcome measures | Effect size                                                                                                                                       | Source of funding |
|------------------------------------------------------------------------------------------------------------------------------------------------------------------------------------------------------|------------|--------|-------------------|----------------------------------------------------------------------------------------------------------------|-------------------------------|------------|-----------------------------------------------------|------------------|---------------------------------------------------------------------------------------------------------------------------------------------------|-------------------|
| Carr S J, Hill K, Brooks D, Goldstein RS. Pulmonary rehabilitation after acute exacerbation of chronic obstructive pulmonary disease in patients who previously completed a pulmonary rehabilitation | RCT        | 1-     | 33 (28 completed) | COPD patients who had undergone pulmonary rehabilitation. Followed-up and randomised if exacerbation occurred. | 3 week pulmonary rehab course | Usual care | 7 weeks post second pulmonary rehabilitation course | CRDQ; 6MWT       | No difference in per protocol analysis. Exclusion of those with further exacerbation suggested small improvement in dyspnoea (no change in 6MWD). | Not stated        |

program. J  
 Cardiopulm Rehab  
 Prev. 2009;  
 29(5):318-24.  
 Comments:

| Bibliographic citation                                                                                                                                                                                  | Study type | Ev lev | Number patients | Patient characteristics                                                                                                                                                                         | Intervention | Comparison                                                                                                                                                                                                  | Length of follow up | Outcome measures                                                                                                                                                                                                                                               | Effect size                                                                                                                                                                                                                                                                                                                                                                                                                                                                                                                                   | Source of funding                               |
|---------------------------------------------------------------------------------------------------------------------------------------------------------------------------------------------------------|------------|--------|-----------------|-------------------------------------------------------------------------------------------------------------------------------------------------------------------------------------------------|--------------|-------------------------------------------------------------------------------------------------------------------------------------------------------------------------------------------------------------|---------------------|----------------------------------------------------------------------------------------------------------------------------------------------------------------------------------------------------------------------------------------------------------------|-----------------------------------------------------------------------------------------------------------------------------------------------------------------------------------------------------------------------------------------------------------------------------------------------------------------------------------------------------------------------------------------------------------------------------------------------------------------------------------------------------------------------------------------------|-------------------------------------------------|
| Casaburi R, Kukafka D, Cooper CB. <i>et al.</i> Improvement in exercise tolerance with the combination of tiotropium and pulmonary rehabilitation in patients with COPD. Chest. 2005; 127 (3): 809-817. | RCT        | 1-     | 126             | Patients with COPD – 57% male, FEV1 0.88(0.36) L; 34(12) % predicted – randomised to pulmonary rehabilitation with or without tiotropium. 47 tiotropium and 44 control subjects completed study | All subjects | 8 week outpatient pulmonary rehabilitation with 3 supervised exercise sessions/week. Randomised to tiotropium or placebo which was taken 5 weeks before, during and 12 weeks after pulmonary rehabilitation | 12 weeks            | Comparison of group response based on taking tiotropium or placebo. Outcome measures endurance exercise time (minutes) on self-limited constant load treadmill test set to 80% of peak achieved on incremental treadmill test, dyspnoea (TDI) and HRQOL (SGRQ) | Tiotropium patients endurance exercise time increased 5.35 minutes greater than placebo at end of pulmonary rehabilitation and 6.6 minutes greater than placebo at 12 weeks post-pulmonary rehabilitation (both p<0.05). TDI scores not significantly different at end of pulmonary rehabilitation but 1.67 greater improvement with tiotropium compared with placebo at 12 weeks post-pulmonary rehabilitation (p<0.05). SGRQ score 4 point greater improvement tiotropium vs. placebo at end of pulmonary rehabilitation and 12 weeks post- | Boehringer Ingelheim and Pfizer Pharmaceuticals |



pulmonary rehabilitation but not significantly different

Comments: The addition of tiotropium to other bronchodilator therapy before, during and after pulmonary rehabilitation leads to greater improvement in exercise capacity after pulmonary rehabilitation and greater improvement in exercise capacity and dyspnoea 12 weeks post-pulmonary rehabilitation. Randomisation, allocation concealment, and blinding are not adequately reported. One caution (acknowledged by the authors) is that they use parametric statistics for skewed censored data – the one analysis they include using a non-parametric approach reduced the number of significant findings. However, the results are consistent across measures and the effect size is large.

| Bibliographic citation                                                                                                                                                                                        | Study type            | Ev lev | Number patients                                                                                                        | Patient characteristics                                                                                                                                                                                                                                                                                                                                                                                                                       | Intervention                                                     | Comparison                                                                     | Length of follow up | Outcome measures                                                        | Effect size                                                                                                                                                                                                                                              | Source of funding                                                                                                                                                                                                                                           |
|---------------------------------------------------------------------------------------------------------------------------------------------------------------------------------------------------------------|-----------------------|--------|------------------------------------------------------------------------------------------------------------------------|-----------------------------------------------------------------------------------------------------------------------------------------------------------------------------------------------------------------------------------------------------------------------------------------------------------------------------------------------------------------------------------------------------------------------------------------------|------------------------------------------------------------------|--------------------------------------------------------------------------------|---------------------|-------------------------------------------------------------------------|----------------------------------------------------------------------------------------------------------------------------------------------------------------------------------------------------------------------------------------------------------|-------------------------------------------------------------------------------------------------------------------------------------------------------------------------------------------------------------------------------------------------------------|
| Casaburi R, Bhasin S, Cosentino L, <i>et al.</i><br>Effects of Testosterone and Resistance Training in Men with Chronic Obstructive Pulmonary Disease. <i>Am J Respir Crit Care Med.</i> 2004; 170 (8):870-8. | RCT                   | 1+     | 53 (all men) (47 completed) (11 testosterone + training, 12 testosterone alone 12 placebo + training, 12 placebo alone | Age 55 to 80 years, FEV1 of 60% predicted or less, and FEV1 to vital capacity ratio of 60% or less. serum testosterone was 400 ng/dl or less. Exclusion criteria significant cardiovascular or orthopaedic impairments, body weight of less than 75% or more than 130% of ideal, symptomatic benign prostatic hypertrophy, prostate cancer history, serum prostate specific antigen of more than 4 µg/L, or haemoglobin of more than 16 g/dl. | Strength training and/or testosterone supplementation (100mg IM) | Resistance training, Resistance training + testosterone, placebo, Testosterone | 10 weeks            | Strength, muscle mass, exercise endurance, blood markers, lung function | Lean body mass; Testosterone alone increased 2.2kg (p<0.001) Testosterone + training increased 3.3kg (p<0.001) Maximum leg press strength; Testosterone alone increase 17.2%, Placebo + training increase 17.4%, Testosterone + training 26.8% (p<0.001) | California Tobacco-Related Disease Research Programme, grant number 6RT-036, the resources of the General Clinical Research Centre, grant M01-RR00425 of the National Center for Research Resources, and the BioTechnology General Corporation (Iselin, NJ) |
| Comments: Men only                                                                                                                                                                                            |                       |        |                                                                                                                        |                                                                                                                                                                                                                                                                                                                                                                                                                                               |                                                                  |                                                                                |                     |                                                                         |                                                                                                                                                                                                                                                          |                                                                                                                                                                                                                                                             |
| Cindy Ng LW, Mackney J, Jenkins S, Hill K. Does                                                                                                                                                               | Systematic review and | 2++    | Randomised trials n=201, Single arm intervention n=266.                                                                | COPD, Original paper in English, Minimum 4                                                                                                                                                                                                                                                                                                                                                                                                    | Exercise training                                                | N/A                                                                            | 6 weeks to 6 months | Physical activity in absolute values (e.g. steps, activity count)       | Statistically significant, but clinically small                                                                                                                                                                                                          | None                                                                                                                                                                                                                                                        |

exercise training change physical activity in people with COPD? A systematic review and meta-analysis. *Chronic Respiratory Disease*. 2012; 9:17-26.

meta-analysis (cohort studies, case-control studies)

weeks exercise therapy, used physical activity monitor.

increase in physical activity (Effect size 0.12)

| <b>Bibliographic citation</b>                                                                                                                                                                                                      | <b>Study type</b> | <b>Ev lev</b> | <b>Number patients</b>        | <b>Patient characteristics</b>              | <b>Intervention</b>                                 | <b>Comparison</b>             | <b>Length of follow up</b>                          | <b>Outcome measures</b>                                                                                                           | <b>Effect size</b>                                                                                                   | <b>Source of funding</b> |
|------------------------------------------------------------------------------------------------------------------------------------------------------------------------------------------------------------------------------------|-------------------|---------------|-------------------------------|---------------------------------------------|-----------------------------------------------------|-------------------------------|-----------------------------------------------------|-----------------------------------------------------------------------------------------------------------------------------------|----------------------------------------------------------------------------------------------------------------------|--------------------------|
| Clark CJ, Cochrane L, Mackay E. Low intensity peripheral muscle conditioning improves exercise tolerance and breathlessness in COPD. <i>Eur Respir J</i> . 1996; 9(12):2590-6.<br>Comments: Training programme likely insufficient | RCT               | 1-            | 10 (sub-group of 48 patients) | COPD. 58 years old, FEV1 67% predicted      | The Hairmyres home exercise programme               | Usual care                    | 12 weeks                                            | Peripheral muscle endurance, peripheral muscle strength, whole body endurance, aerobic capacity                                   | No effect                                                                                                            | Not stated               |
| Clark CJ, Cochrane LM, Mackay E, Paton B. Skeletal muscle strength and endurance in patients with mild COPD and the effects of weight training. <i>Eur Respir J</i> . 2000; 15(1):92-7.<br>Comments:                               | RCT               | 1+            | 43                            | 49 years, FEV1 77%                          | 10 x 8 reps of 70% maximum. All major muscle groups | Control group                 | 12 weeks                                            | Isokinetic muscle strength. Endurance walk. Isotonic muscle strength (1RM)                                                        | Increase in isotonic strength (quadriceps 7.6 Kg), increase in isokinetic strength. Increase in endurance walk test. | Not stated               |
| Costes F, Agresti A, Court-Fortune I, et al. Noninvasive ventilation during exercise training improves exercise tolerance in                                                                                                       | RCT               | 1-            | 7 controls 7 intervention     | COPD FEV1 31.5% predicted mean age 63 years | NIV during pulmonary rehabilitation programme       | Unassisted training programme | before and after pulmonary rehabilitation programme | Exercise capacity at steady state in incremental test NIV increased exercise tolerance, reduced dyspnoea, and prevented exercise- | Improvement in peak VO2 18% vs. 2% p<0.05 ns change in constant work load duration and in lactate levels             | Not stated               |

patients with COPD. Journal of Cardiopulmonary rehabilitation. 2003;23:307-313.

Comments: Pilot, un blinded study, very small numbers.

| Bibliographic citation                                                                                                                                                                                                                | Study type                          | Ev lev | Number patients | Patient characteristics                                                        | Intervention                           | Comparison | Length of follow up | Outcome measures                                     | Effect size                                     | Source of funding                                                                |
|---------------------------------------------------------------------------------------------------------------------------------------------------------------------------------------------------------------------------------------|-------------------------------------|--------|-----------------|--------------------------------------------------------------------------------|----------------------------------------|------------|---------------------|------------------------------------------------------|-------------------------------------------------|----------------------------------------------------------------------------------|
| Coventry PA, Hind D. Comprehensive pulmonary rehabilitation for anxiety and depression in adults with chronic obstructive pulmonary disease: Systematic review and meta-analysis Journal of Psychosomatic Research. 2007; 63:551–565. | Systematic review and meta-analysis | 1+     | 269             | Clinically stable, age >18, 80% patients at least with moderate to severe COPD | Comprehensive pulmonary rehabilitation | Usual care | 10 weeks to 1 year  | CES-D depression, SCL-90 R, STAI state anxiety, HADS | -0.33 SMD for anxiety, -0.58 SMD for depression | Medical Research Council Special Training Fellowship in Health Services Research |

Comments:

| Bibliographic citation                                                                                                                                                                              | Study type | Ev lev | Number patients                                                                                                                             | Patient characteristics                                                                                                                                             | Intervention                                                                       | Comparison       | Length of follow up | Outcome measures                                                                                  | Effect size                                                                                                                                                                                                                                                                                                  | Source of funding       |
|-----------------------------------------------------------------------------------------------------------------------------------------------------------------------------------------------------|------------|--------|---------------------------------------------------------------------------------------------------------------------------------------------|---------------------------------------------------------------------------------------------------------------------------------------------------------------------|------------------------------------------------------------------------------------|------------------|---------------------|---------------------------------------------------------------------------------------------------|--------------------------------------------------------------------------------------------------------------------------------------------------------------------------------------------------------------------------------------------------------------------------------------------------------------|-------------------------|
| Creutzberg EC, Wouters EF, Mostert R, et al. A role for anabolic steroids in the rehabilitation of patients with COPD? A double blind placebo controlled randomised trial. Chest. 2003;124:1733-42. | RCT        | 1+     | 63 (63 male) 33 intervention (19 maintenance low dose oral glucocorticosteroids), 30 placebo (12 maintenance low dose glucocorticosteroids) | Consecutively admitted to pulmonary rehabilitation, COPD, inpatients FEV1 <70% with an increase in FEV1 of <10% after inhalation of a B2-agonist. Clinically stable | 50 mg Nandrolone deconoate (ND) in 1 mL arachis oil IM injection day 1, 15, 29, 43 | 1 mL arachis oil | 8 weeks             | Body composition, Muscle function, exercise performance, Health status, erythropoietic parameters | Fat free mass (mean); ND +1.7kg, placebo +0.3kg (p=0.015). Intracellular mass (mean); ND +1.8 kg placebo -0.5 kg (p=0.002) Patients receiving low-dose oral glucocorticosteroids; Max inspiratory muscle strength; ND +6.0 cm H2O v -2.18 cm H2O (p=0.046) Peak workload; ND 20.47W v placebo 4.8W (p=0.023) | Supported by NV Organon |

induced oxygen desaturation both before and after training

Comments: Good detail of randomised process.

| Bibliographic citation                                                                                                                                          | Study type | Ev lev | Number patients | Patient characteristics                                                                                                                                                                                                                        | Intervention | Comparison                                                                | Length of follow up | Outcome measures                                                                                                                                                                                                                                                                           | Effect size                                                                                                                                                                                                                                                                                                                                                                                         | Source of funding |
|-----------------------------------------------------------------------------------------------------------------------------------------------------------------|------------|--------|-----------------|------------------------------------------------------------------------------------------------------------------------------------------------------------------------------------------------------------------------------------------------|--------------|---------------------------------------------------------------------------|---------------------|--------------------------------------------------------------------------------------------------------------------------------------------------------------------------------------------------------------------------------------------------------------------------------------------|-----------------------------------------------------------------------------------------------------------------------------------------------------------------------------------------------------------------------------------------------------------------------------------------------------------------------------------------------------------------------------------------------------|-------------------|
| Crisafulli E, Costi S, Luppi F, <i>et al.</i> Role of comorbidities in a cohort with COPD undergoing pulmonary rehabilitation. <i>Thorax.</i> 2008; 63:487-492. | Cohort     | 3      | 2962            | 2150 male and 812 female patients with COPD (FEV1 49(15)% predicted. Co-morbidity defined using the Charlson index. Groups were divided into Charlson score 0, 1, 2 and >2. Heart disease defined by the presence or absence of CHF and/or IHD | All subjects | A minimum of 15 inpatient or outpatient pulmonary rehabilitation sessions | NA                  | Comparison of group response based on level of co-morbidity. 51% had Charlson score of 0, 38% had a Charlson score of 1, 11% had a Charlson score of 2 and 2% had a Charlson score of >2. Outcome measures exercise capacity (6MWD), breathlessness (MRC score) and quality of life (SGRQ) | Using multiple logistic regression analysis patients with a higher Charlson index were less likely to gain a 54 m improvement in 6MWD (OR 0.72 (0.54-0.98), p<0.03) and gain a 4 point improvement in SGRQ (OR 0.51(0.38-0.68), p<0.001). Patients with heart disease were more likely to improve 6MWD (OR 2.36 (1.85-3.01), p<0.001) but less likely to improve SGRQ (OR 0.67 (0.55-0.83, p<0.001) | Not stated        |

Comments: The vast majority of COPD patients with or without co-morbidity or heart disease gain significant improvement in 6MWD, MRC score and SGRQ after pulmonary rehabilitation. However, the presence of more co-morbidity is associated with a modest reduction in 6MWD and SGRQ but not MRC score improvement. Heart disease is associated with a greater 6MWD improvement but poorer SGRQ improvement

| Bibliographic citation                                                                                                                                                   | Study type | Ev lev | Number patients | Patient characteristics                                                                                                                                                                                   | Intervention | Comparison                                                                                  | Length of follow up | Outcome measures                                                                                                                                                                                                                                           | Effect size                                                                                                                                                                                                               | Source of funding |
|--------------------------------------------------------------------------------------------------------------------------------------------------------------------------|------------|--------|-----------------|-----------------------------------------------------------------------------------------------------------------------------------------------------------------------------------------------------------|--------------|---------------------------------------------------------------------------------------------|---------------------|------------------------------------------------------------------------------------------------------------------------------------------------------------------------------------------------------------------------------------------------------------|---------------------------------------------------------------------------------------------------------------------------------------------------------------------------------------------------------------------------|-------------------|
| Crisafulli E, Gorgone P, Vagaggini B, <i>et al.</i> Effect of standard rehabilitation in COPD outpatients with comorbidities. <i>Eur Resp J.</i> 2010; 36 (5):1042-1048. | Cohort     | 3      | 316             | 235 male and 81 female patients with COPD (FEV1 50(14)% predicted. Co-morbidity defined using the Charlson index. Groups were divided into Charlson score 0, 1, 2+. Heart disease defined by the presence | All subjects | 8 week pulmonary rehabilitation with 3 hour+ session x 3/week. Minimum 21 sessions attended | NA                  | Comparison of the proportion of patients gaining a 54 m improvement in 6MWD, a 1 point improvement in MRC score and a 4 point improvement in SGRQ. Groups divided according to Charlson score of 0 (38%), 1 (34%) and 2+ (28%) and heart disease – 21% had | Using multiple logistic regression analysis co-morbidity and heart disease was not related to improvement in 6MWD and SGRQ after pulmonary rehabilitation. Fewer (61%) of patients with 0 co-morbidity achieved a 1 point | Not stated        |

or absence of  
CHF and/or IHD

heart disease

improvement in  
MRC score  
compared to  
patients with 1  
(84%) and 2+  
(70%) co-  
morbidity. Heart  
disease was  
unrelated to MRC  
improvement

**Comments: Patients with more co-morbidities and heart disease are at least as likely to gain improvement in walking distance, breathlessness and quality of life after pulmonary rehabilitation.**

| Bibliographic citation                                                                                                                                                                                                                     | Study type | Ev lev | Number patients | Patient characteristics                                                                    | Intervention                                                                                                                      | Comparison                                                                                  | Length of follow up                        | Outcome measures                                        | Effect size                     | Source of funding                |
|--------------------------------------------------------------------------------------------------------------------------------------------------------------------------------------------------------------------------------------------|------------|--------|-----------------|--------------------------------------------------------------------------------------------|-----------------------------------------------------------------------------------------------------------------------------------|---------------------------------------------------------------------------------------------|--------------------------------------------|---------------------------------------------------------|---------------------------------|----------------------------------|
| Deacon S, Vincent EE, Greenhaff PL <i>et al.</i> Randomized Controlled Trial of Dietary Creatine as an Adjunct Therapy to Physical Training in Chronic Obstructive Pulmonary Disease. <i>Am J Respir Crit Care Med.</i> 2008; 178:233–239. | RCT        | 1+     | 80              | "COPD patients" - no spirometric or history criteria - undergoing pulmonary rehabilitation | Loaded for 5 days with 22 g Creatine daily in four divided doses, followed by maintenance dose during PR of 3.76 g Creatine daily | Loading of 24g lactose daily in divided doses followed by a maintenance of 4g lactose daily | 8 weeks (end of pulmonary rehabilitation ) | ISWT, ESWT, FFM, muscle strength, CRDQ, muscle creatine | No significant differences seen | Charity: British Lung Foundation |

**Comments: A well conducted study. Claims of a definitive answer are tempered by the low power of the study (powered to detect a doubling of the effect of pulmonary rehabilitation).**

| Bibliographic citation                                                                                                                                                                                                                                    | Study type | Ev lev | Number patients                                   | Patient characteristics                         | Intervention                                                                               | Comparison                                 | Length of follow up | Outcome measures                                                                                        | Effect size                                                                                                          | Source of funding |
|-----------------------------------------------------------------------------------------------------------------------------------------------------------------------------------------------------------------------------------------------------------|------------|--------|---------------------------------------------------|-------------------------------------------------|--------------------------------------------------------------------------------------------|--------------------------------------------|---------------------|---------------------------------------------------------------------------------------------------------|----------------------------------------------------------------------------------------------------------------------|-------------------|
| de Blok BMJ, de Greef MHG, ten Hacken NHT, <i>et al.</i> The effects of a lifestyle physical activity counselling program with feedback of a pedometer during pulmonary rehabilitation in patients with COPD: A pilot study. <i>Patient Education and</i> | RCT        | 1-     | 21 enrolled. 16 completed (per protocol analysis) | Diagnosis of COPD, age 40-85. Literate in Dutch | Lifestyle physical activity counselling programme with pedometer+ pulmonary rehabilitation | Regular pulmonary rehabilitation programme | 9 weeks             | Daily physical activity (Primary). Physical fitness, HRQOL, ADLs, Depression, Self-efficacy (secondary) | No statistically significant difference between groups. . Control group increased by 19%, Intervention group by 69%) | Not stated        |

Counselling. 2006; 61: 48–55.

Comments:

| Bibliographic citation                                                                                                                                                                                              | Study type                                 | Ev lev | Number patients | Patient characteristics                                                                   | Intervention      | Comparison                                                                                    | Length of follow up | Outcome measures                                                      | Effect size                                                                                                                                                                                                                                                                                                                                                                                        | Source of funding |
|---------------------------------------------------------------------------------------------------------------------------------------------------------------------------------------------------------------------|--------------------------------------------|--------|-----------------|-------------------------------------------------------------------------------------------|-------------------|-----------------------------------------------------------------------------------------------|---------------------|-----------------------------------------------------------------------|----------------------------------------------------------------------------------------------------------------------------------------------------------------------------------------------------------------------------------------------------------------------------------------------------------------------------------------------------------------------------------------------------|-------------------|
| Dourado VZ, Tanni SE, Antunes LCO, <i>et al.</i> Effect of three exercise programs on patients with chronic obstructive pulmonary disease. Brazilian Journal of Medical and Biological Research. 2009; 42: 263-271. | Randomised to 3 different treatment groups | 1-     | 47              | COPD. Acute exacerbation excluded and co-morbidity i.e. cardio vascular disease excluded. | Strength training | Strength training (ST) vs. general low intensity training (LGT) vs. combination training (CT) | 12 weeks            | 6MWD, AQ20, FEV1, BMI, FFM, SGRQ. Muscle strength, functional fitness | In the ST and CT groups, an additional improvement in 1-RM values was shown (P < 0.05) compared to the LGT group (ST = 10 ± 6 to 57 ± 36 kg; CT = 6 ± 2 to 38 ± 16 kg; LGT = 1 ± 2 to 16 ± 12 kg). The addition of strength training to low intensity general training increased muscle strength; however, it produced no additional improvement in walking endurance, dyspnoea or quality of life | Not stated        |

Comments:

| Bibliographic citation                                                                                                                                                   | Study type | Ev lev | Number patients                      | Patient characteristics                                                                                                                            | Intervention                                                                                                                                                    | Comparison                                          | Length of follow up                                                         | Outcome measures                                                                | Effect size                                                                                            | Source of funding |
|--------------------------------------------------------------------------------------------------------------------------------------------------------------------------|------------|--------|--------------------------------------|----------------------------------------------------------------------------------------------------------------------------------------------------|-----------------------------------------------------------------------------------------------------------------------------------------------------------------|-----------------------------------------------------|-----------------------------------------------------------------------------|---------------------------------------------------------------------------------|--------------------------------------------------------------------------------------------------------|-------------------|
| du Moulin M, Taube K, Wegscheider K, <i>et al.</i> Home-based exercise training as maintenance after outpatient pulmonary rehabilitation. Respiration. 2009; 77:139-145. | RCT        | 1-     | 20 patients recruited. 8 completers. | Only patients not planning to attend other forms of maintenance were included. Moderate COPD – FEV1 50 – 80% Exclusions – significant co-morbidity | Individualised training plan – to walk 125% of last 6MWD 3 x days or combined into 1 walk a day. Home based setting. Telephone contact 4 weekly for motivation. | Control groups no instruction re physical activity. | Baseline (completion of pulmonary rehabilitation programme), 3 and 6 months | Primary outcome 6MWD. Secondary endpoints – HRQOL (CRDQ), lung function (FEV1). | Significantly better 6MWD (p= 0.033), CRDQ scores (p= 0.027) and FEV1 (p= 0.007) in intervention group | Not stated        |

Comments: The authors conclude that their maintenance strategy had a significant effect on health outcomes in patients with moderate COPD. The initial out-patient pulmonary rehabilitation programme was only 3 weeks. The authors argue that short, intensive programmes are effective and commonplace in the German healthcare system. Outcomes were only measured up to 6 months, so we are not able to see the longer term effect of the intervention. The authors acknowledge the very small study sample and report that recruitment was difficult. The study was insufficiently powered, with only 10 patients in each arm. There was a very high dropout percentage of 60% in each arm. The authors suggest that as results were analysed using ITT, the effect size may have been larger. Only patients with moderate COPD not planning to attend other maintenance programmes were included, so results are only generalisable to a sub-group of patients graduating from a pulmonary rehabilitation programme. The authors report that maintenance groups are readily available to graduates of their programme, so it is possible that this group was less motivated than a cross section of all patients completing pulmonary rehabilitation. The control group may, therefore have been more likely to decline faster than a cross section, as they may not be motivated to continue with an active lifestyle per se. The reported improvements in 6MWD and CRDQ in the intervention group are below the level of clinical relevance. Despite these limitations, the unsupervised home exercise appears to, at the least; maintain the effects of a pulmonary rehabilitation.

| Bibliographic citation                                                                                                                                                                                                           | Study type | Ev lev | Number patients              | Patient characteristics                                                           | Intervention                                                                                    | Comparison                                 | Length of follow up             | Outcome measures | Effect size                                                                                                                                                                | Source of funding |
|----------------------------------------------------------------------------------------------------------------------------------------------------------------------------------------------------------------------------------|------------|--------|------------------------------|-----------------------------------------------------------------------------------|-------------------------------------------------------------------------------------------------|--------------------------------------------|---------------------------------|------------------|----------------------------------------------------------------------------------------------------------------------------------------------------------------------------|-------------------|
| Dyer F, Callaghan J, Cheema K, Bott J. Ambulatory oxygen improves the effectiveness of pulmonary rehabilitation in selected patients with Chronic Obstructive Pulmonary Disease. Chronic Respiratory Disease. 2012; 9 (2):83-91. | RCT        | 1-     | 55 randomised, 47 completed. | “patients with COPD” not using home oxygen meeting criteria for ambulatory oxygen | Pulmonary rehabilitation sessions twice weekly for 7 weeks with supplemental oxygen 2-6 litres. | Pulmonary rehabilitation only (no placebo) | End of pulmonary rehabilitation | ESWT; HADS; CRDQ | Major improvements in ESWT – O2 group improved almost 1 km through pulmonary rehabilitation. Additional benefit of 0.5 km versus room air group. No change in CRDQ or HADS | Charity           |

Comments: Small study (underpowered for clinically expected difference and sample size calculation not inflated for expected drop-outs). Randomisation process is described but only the walk test assessor was blinded (not participants/other authors/statistical analysis). No placebo was used for the standard care group, though they were assessed using an oxygen cylinder in the final walk test.

| Bibliographic citation                                                                                                                                                                                    | Study type | Ev lev | Number patients | Patient characteristics                     | Intervention                                                              | Comparison                                                             | Length of follow up             | Outcome measures                                                                                                 | Effect size                                                                                                                                                                                             | Source of funding |
|-----------------------------------------------------------------------------------------------------------------------------------------------------------------------------------------------------------|------------|--------|-----------------|---------------------------------------------|---------------------------------------------------------------------------|------------------------------------------------------------------------|---------------------------------|------------------------------------------------------------------------------------------------------------------|---------------------------------------------------------------------------------------------------------------------------------------------------------------------------------------------------------|-------------------|
| Emtner M, Porszasz J, Burns M, et al Benefits of Supplemental Oxygen in Exercise Training in Nonhypoxemic Chronic Obstructive Pulmonary Disease Patients. Am J Respir Crit Care Med. 2003; 168:1034–1042. | RCT        | 1+     | 29              | COPD with FEV1<50%. Not hypoxaemic at rest. | 7 week pulmonary rehabilitation programme; 3 l/min oxygen during exercise | 7 week pulmonary rehabilitation programme; 3 l/min air during exercise | End of pulmonary rehabilitation | CPEX (incremental and constant tests in air and with 30% O2); ABG; lung volumes & transfer capacity; CRDQ; SF-36 | 10% additional reduction in respiratory rate at isotime; four SF-36 sections showed improvement with oxygen versus one with air. No additional improvement in the great majority of parameters measured | Charity           |

Comments: Largely a well conducted/described study. The discussion and abstract perhaps overstate the additional benefit of supplemental oxygen seen in the study.

| Bibliographic citation                                                                                                                                                        | Study type | Ev lev | Number patients | Patient characteristics                                                                                                                                               | Intervention | Comparison                                                                 | Length of follow up | Outcome measures                                                                                      | Effect size                                                                                                                                                                                | Source of funding |
|-------------------------------------------------------------------------------------------------------------------------------------------------------------------------------|------------|--------|-----------------|-----------------------------------------------------------------------------------------------------------------------------------------------------------------------|--------------|----------------------------------------------------------------------------|---------------------|-------------------------------------------------------------------------------------------------------|--------------------------------------------------------------------------------------------------------------------------------------------------------------------------------------------|-------------------|
| Evans RA, Singh SJ, Collier R, <i>et al.</i><br>Pulmonary Rehabilitation is successful for COPD irrespective of MRC dyspnoea grade. <i>Resp Med.</i> 2009; 103 (7):1070-1075. | Cohort     | 3      | 450             | 55% male patients with COPD (FEV1 40(18)% predicted; 1.0(0.5)L of who 395 (85%) completed pulmonary rehabilitation. MRC2 = 15%, MRC3 = 25%, MRC4 = 27% and MRC5 = 32% | All subjects | 7 weeks outpatient PR – 2 week supervised sessions and daily home exercise | NA                  | Comparison of group response based on MRC2 vs. MRC3, 4 or 5. Outcome measure exercise capacity (ISWT) | No significant difference in change in exercise capacity in MRC2 vs. MRC3, 4 and 5. Median (IQR) improvement 66(50-83)m in MRC2 vs. 63(50-75)m MRC3 vs. 59(49-70)m MRC4 vs. 54(43-64) MRC5 | Not stated        |

Comments: After completion of pulmonary rehabilitation patients with baseline MRC2 dyspnoea gain similar improvement in walking distance and breathlessness as MRC3, 4 and 5 patients

| Bibliographic citation                                                                                                                                                                                                       | Study type | Ev lev | Number patients | Patient characteristics | Intervention                                                                                                                                | Comparison                               | Length of follow up | Outcome measures                                     | Effect size                     | Source of funding |
|------------------------------------------------------------------------------------------------------------------------------------------------------------------------------------------------------------------------------|------------|--------|-----------------|-------------------------|---------------------------------------------------------------------------------------------------------------------------------------------|------------------------------------------|---------------------|------------------------------------------------------|---------------------------------|-------------------|
| Faager G, Söderland K, Skold CM, <i>et al.</i><br>Creatine supplementation and physical training in patients with COPD: A double blind, placebo-controlled study. <i>International Journal of COPD.</i> 2006; 1(4): 445–453. | RCT        | 1-     | 23              | COPD by BTS criteria    | Oral creatine. Creatine dose was 0.3 g/kg body weight/day during seven days and then 0.07 g/kg body weight/day during the remaining 7 weeks | Oral glucose powder - dose not described | 8 weeks             | ESWT, FEV1, muscle strength (grip and knee extensor) | No significant differences seen | Not stated        |

Comments: A small study reduced further in power by some outcomes having been assessed only in a subset. Randomisation and blinding not adequately described.

| Bibliographic citation                                                                                                                               | Study type | Ev lev | Number patients                  | Patient characteristics                                                                 | Intervention                                                                                                        | Comparison                                | Length of follow up | Outcome measures                     | Effect size                                                      | Source of funding |
|------------------------------------------------------------------------------------------------------------------------------------------------------|------------|--------|----------------------------------|-----------------------------------------------------------------------------------------|---------------------------------------------------------------------------------------------------------------------|-------------------------------------------|---------------------|--------------------------------------|------------------------------------------------------------------|-------------------|
| Fernandez AM, Pascual J, Ferrando C, <i>et al.</i> Home-based pulmonary rehabilitation in very severe COPD: is it safe and useful? <i>Journal of</i> | RCT        | 1-     | 42 (Intervention=27, control=15) | GOLD 4 COPD, on LTOT, no severe CVS co-morbidity, <80 years, Clinically stable for 2/12 | 2 initial hospital sessions, then 5/week home based unsupervised exercise, twice a month visits for first 2 months. | Control group (though received education) | 1 year              | Pulmonary function tests, 6MWT, SGRQ | Significant improvement in 6MWT, SGRQ at one year in rehab group | Not stated        |



**Cardiopulmonary Rehabilitation & Prevention. 2009; 29(5):325-31**

Adherence defined as one hour per day 5/week >80% of the time.

**Comments: Long period of rehab. Good results in very severe cohort. Low drop-out/mortality and excellent adherence in such a severe group.**

| Bibliographic citation                                                                                                                                                                                                    | Study type | Ev lev | Number patients             | Patient characteristics                                                                                                    | Intervention                                       | Comparison                            | Length of follow up                                     | Outcome measures                                                                                       | Effect size                                                                                                                                                                                                                                                                                                      | Source of funding |
|---------------------------------------------------------------------------------------------------------------------------------------------------------------------------------------------------------------------------|------------|--------|-----------------------------|----------------------------------------------------------------------------------------------------------------------------|----------------------------------------------------|---------------------------------------|---------------------------------------------------------|--------------------------------------------------------------------------------------------------------|------------------------------------------------------------------------------------------------------------------------------------------------------------------------------------------------------------------------------------------------------------------------------------------------------------------|-------------------|
| <b>Foglio K, Bianchi L, Ambrosino N. Is it really useful to repeat outpatient pulmonary rehabilitation programs in patients with chronic airway obstruction? A 2-year controlled study. Chest. 2001; 119(6):1696-704.</b> | RCT        | 1-     | 61 randomised, 36 completed | 26 patients with COPD by ATS criteria, 35 with asthma. All underwent 8 week pulmonary rehabilitation programme at baseline | Pulmonary rehabilitation at one year and two years | Pulmonary rehabilitation at two years | 2 years (up to end of pulmonary rehabilitation session) | Lung function and volumes; ABG; CPEX; 6MWD; BDI &TDI; SGRQ; exacerbations (steroid course); admissions | Short term gains seen in symptoms, QOL, and exercise capacity with each rehab session but no additive effect from the additional session. The only exception was the reduction in exacerbations seen (all 19 of those in the control group had at least one exacerbation whereas 8/17 in the active arm did not. | Not stated        |

**Comments: Randomisation process unclear. Though blinding is reported, it appears insufficient as the patients were free to disclose the information to the technicians and those undertaking medical care, trial visits, and analyses were not blinded. Small initial sample with large proportion of drop-outs.**

| Bibliographic citation                                                                                                                                                                                  | Study type | Ev lev | Number patients | Patient characteristics                                        | Intervention                       | Comparison | Length of follow up | Outcome measures                                    | Effect size                                                                       | Source of funding |
|---------------------------------------------------------------------------------------------------------------------------------------------------------------------------------------------------------|------------|--------|-----------------|----------------------------------------------------------------|------------------------------------|------------|---------------------|-----------------------------------------------------|-----------------------------------------------------------------------------------|-------------------|
| <b>Franssen FME, Broekhuizen R, Janssen PP, et al. Effects of Whole-Body Exercise Training on Body Composition and Functional Capacity in Normal-Weight Patients With COPD. Chest. 2004; 12:2021-8.</b> | Cohort     | 2+     | 50              | COPD. FEV1 <70% predicted. BMI >21 and FFM >15 (women)/>16 men | Inpatient pulmonary rehabilitation | n/a        | 8 weeks             | Weight, FFM, exercise capacity, quadriceps strength | Weight increased by 0.6Kg. 35% increase in peak work rate and 17% increase in VO2 | Not stated        |

**Comments:**

| Bibliographic citation                                                                                                                                                  | Study type | Ev lev | Number patients | Patient characteristics   | Intervention                                                                     | Comparison                             | Length of follow up | Outcome measures                                                                                         | Effect size                                                                                                                                                                                                                                                                                                  | Source of funding |
|-------------------------------------------------------------------------------------------------------------------------------------------------------------------------|------------|--------|-----------------|---------------------------|----------------------------------------------------------------------------------|----------------------------------------|---------------------|----------------------------------------------------------------------------------------------------------|--------------------------------------------------------------------------------------------------------------------------------------------------------------------------------------------------------------------------------------------------------------------------------------------------------------|-------------------|
| Fuld J, Kilduff LP, Neder JA, <i>et al.</i> Creatine supplementation during pulmonary rehabilitation in chronic obstructive pulmonary disease Thorax. 2005; 60:531–537. | RCT        | 1-     | 38              | "Moderate to severe COPD" | 5.7 g creatine monohydrate, equivalent to 5 g creatine and 35 g glucose per dose | glucose polymer only (40.7 g per dose) | 12 weeks            | FEV1, MIP, Weight, Fat free mass, upper and lower limb strengths, exercise test, shuttle walk test, SGRQ | No difference in exercise test results. Lower limb strength and endurance notably better than placebo (improvements over baseline of >15%); Handgrip endurance increased significantly but less markedly (8.0% increase in repetitions vs. 2.2%). Fat free mass improved by around 1 kg compared to placebo. | Wellcome Trust    |

**Comments:** There were several drop-outs with little explanation. The confidence intervals for "significantly different" endpoints overlap raising concern over the clarity of the analysis description. There are far more endpoints analysed than patients completing the trial raising the possibility of chance findings.

| Bibliographic citation                                                                                                                                                                                                    | Study type | Ev lev | Number patients | Patient characteristics                | Intervention | Comparison | Length of follow up | Outcome measures                       | Effect size | Source of funding                                 |
|---------------------------------------------------------------------------------------------------------------------------------------------------------------------------------------------------------------------------|------------|--------|-----------------|----------------------------------------|--------------|------------|---------------------|----------------------------------------|-------------|---------------------------------------------------|
| Garcia-Aymerich J, Lange P, Benet M <i>et al.</i> Regular physical activity reduces hospital admission and mortality in chronic obstructive pulmonary disease: a population based cohort study. Thorax. 2006; 61:772–778. | Cohort     | 2+     | 2386            | Obstructive spirometry (FEV1/FVC <70%) | n/a          | n/a        | Mean F/u 12 years   | physical activity, hospital admissions | n/a         | Danish Heart Foundation, Generalitat de Catalunya |

**Comments:**

| Bibliographic citation          | Study type | Ev lev | Number patients             | Patient characteristics | Intervention      | Comparison        | Length of follow up | Outcome measures                 | Effect size                         | Source of funding |
|---------------------------------|------------|--------|-----------------------------|-------------------------|-------------------|-------------------|---------------------|----------------------------------|-------------------------------------|-------------------|
| Garrod R, Paul EA, Wedzicha JA. | RCT        | 1-     | 25 randomised; 22 completed | "severe stable COPD" ;  | 6 weeks pulmonary | 6 weeks pulmonary | End of pulmonary    | Spirometry; ISWT; HAD; CRDQ; ADL | 1.5 unit fall in Borg score; others | Not stated        |

Supplemental oxygen during pulmonary rehabilitation in patients with COPD with exercise hypoxaemia. *Thorax*. 2000; 55(7):539-43.

FEV1<40%; less than 15% reversibility to salbutamol; all desaturated on exercise to <90%

rehabilitation with supplemental oxygen (4l/min)

rehabilitation with compressed air (4l/min)

rehabilitation

questionnaire

no difference

Comments: The study was underpowered to provide any degree of certainty that the intervention was ineffective. No record of effect of oxygen on training undertaken. Investigators were not blinded raising the possibility of bias.

| Bibliographic citation                                                                                                                                                                       | Study type | Ev lev | Number patients                      | Patient characteristics                                    | Intervention | Comparison                                                            | Length of follow up | Outcome measures                                                                                                                                                   | Effect size                                                                                                                                                     | Source of funding     |
|----------------------------------------------------------------------------------------------------------------------------------------------------------------------------------------------|------------|--------|--------------------------------------|------------------------------------------------------------|--------------|-----------------------------------------------------------------------|---------------------|--------------------------------------------------------------------------------------------------------------------------------------------------------------------|-----------------------------------------------------------------------------------------------------------------------------------------------------------------|-----------------------|
| Garrod R, Paul EA, Wedzicha JA. An evaluation of the reliability and sensitivity of the London Chest Activity of Daily Living Scale (LCADL). <i>Respiratory medicine</i> . 2002; 96:725-730. | Cohort     | 2+     | 59                                   | Stable, severe COPD. In pulmonary rehabilitation programme | n/a          | LCADL pre and post pulmonary rehabilitation                           | 4 weeks             | LCADL                                                                                                                                                              | Statistically significant reduction in LCADL score following pulmonary rehabilitation (-5.91 of total score)                                                    | Not stated            |
| Garrod R, Marshall J, Jones F. Self-efficacy measurement and goal attainment after pulmonary rehabilitation. <i>International Journal of COPD</i> . 2008; 3:791-6.                           | Cohort     | 2+     | 74 enrolled. Outcomes on 48 patients | Known COPD undergoing pulmonary rehabilitation             | n/a          | COPD self-efficacy scale (CSES) pre and post pulmonary rehabilitation | 7 weeks             | Chronic Obstructive Pulmonary Disease Self-Efficacy scale (CSES) (Primary). 6MWD, Health status, Quads strength, depression, breathlessness during ALD (secondary) | mean change (95% CI) in CSES scores = 0.27 (0.04-0.51): Significant correlations of CSES with 6MWD (r=0.37 p<0.01)LCADL (r=-0.33 p<0.01, SGRQ (r=-0.51 p<0.001) | The Health Foundation |
| Gottlieb V, Lyngsø AM, Nybo B, et al. Pulmonary                                                                                                                                              | RCT        | 1-     | 61                                   | 61 subjects aged 65+ years with moderate COPD              | All subjects | 7 week PR – 2 supervised exercise                                     | 18 months           | Comparison of group response pulmonary rehabilitation vs.                                                                                                          | Pulmonary rehabilitation subjects had                                                                                                                           | Not stated            |

Rehabilitation for Moderate COPD (Gold 2)-Does It Have An Effect? Journal of COPD. 2011; 8 (5):380-386.

(GOLD 2) of who 42 completed the trial (22/35 pulmonary rehabilitation and 20/26) usual care. 28/42 completing subjects female. FEV1 was 64(8)% predicted; 1.43(0.32)L PR vs. 67(9)% predicted; 1.57(0.41)L control

sessions/week

control. Outcomes exercise capacity (6MWD), HRQOL (SGRQ) and dyspnoea (Borg at end of 6MWT)

greater increase in 6MWD (46m) vs. control (4m). No difference in peak Borg between groups. SGRQ improved but magnitude unclear - 6.4(11.3) in text but 5.2 in table; however, not significant though no improvement in control. Benefit gained lost by 18 months follow-up

Comments: Patients with moderate COPD (GOLD 2 – FEV1 50-80% predicted) improve walking distance with pulmonary rehabilitation compared to controls but lose benefit by 18 months

| Bibliographic citation                                                                                                                                                           | Study type | Ev lev | Number patients                                                     | Patient characteristics                                                             | Intervention                                                       | Comparison                                         | Length of follow up                                    | Outcome measures                                                               | Effect size                                                | Source of funding |
|----------------------------------------------------------------------------------------------------------------------------------------------------------------------------------|------------|--------|---------------------------------------------------------------------|-------------------------------------------------------------------------------------|--------------------------------------------------------------------|----------------------------------------------------|--------------------------------------------------------|--------------------------------------------------------------------------------|------------------------------------------------------------|-------------------|
| Graves J, Sandrey V, Graves T, Smith DL. Effectiveness of a group opt-in session on uptake and graduation rates for pulmonary Rehabilitation. Chron Resp Dis. 2010; 7(3):159-64. | Cohort     | 2-     | 200 patients in control group, 400 in historical intervention group | Patients referred to pulmonary rehabilitation programme. Patients had own transport | Group opt-in session, 1 ½ hours, using CBT and information giving. | Conventional care – no opt-in session (historical) | To end of pulmonary rehabilitation programme (8 weeks) | DNA, graduation from pulmonary rehabilitation programme, reasons for drop out. | Reduction in drop out due to non-illness reasons (p=0.001) | Not stated        |

Comments: The authors conclude that the intervention has increased the overall efficiency of the pulmonary rehabilitation programme and they are able to treat more patients without increasing staffing. This intervention is interesting and there was a clear reduction in drop out following its' introduction. The study design raises a high possibility of confounding, with staff being more aware of the need to prevent drop out this may have affected post-intervention programme delivery. Therefore this study cannot be more highly rated as a source of evidence. The study report did not indicate that this potential confounder had been considered during analysis. The positive outcome obtained following introduction of this intervention cannot be confidently attributed to the intervention alone.

| Bibliographic citation                                                                                                                    | Study type | Ev lev | Number patients               | Patient characteristics                                                      | Intervention                                         | Comparison                       | Length of follow up                                                             | Outcome measures                     | Effect size                                                                                                                          | Source of funding |
|-------------------------------------------------------------------------------------------------------------------------------------------|------------|--------|-------------------------------|------------------------------------------------------------------------------|------------------------------------------------------|----------------------------------|---------------------------------------------------------------------------------|--------------------------------------|--------------------------------------------------------------------------------------------------------------------------------------|-------------------|
| Green RH, Singh SJ, Williams J, Morgan MDL. A randomised controlled trial of four weeks versus seven weeks of pulmonary rehabilitation in | RCT        | 1+     | 44 ( 4 weeks=23, 7 weeks =21) | Diagnosed with COPD (FEV1 <80%, ratio FEV1/FVC <70%) and consistent symptoms | Pulmonary rehabilitation duration 4 weeks v 7 weeks. | 4 weeks pulmonary rehabilitation | 4 week group measured at 0 and 4 weeks. 7 week group measured at 0 and 7 weeks. | ISWT, Treadmill Endurance Test, CRDQ | Mean difference between groups: ISWT - 16.9 metres (p=0.415) CRDQ dyspnoea - 0.8 (p=0.021), mastery - 0.84(p=0.027), , emotion -0.89 | Not stated        |

(p=0.003),

chronic obstructive pulmonary disease. *Thorax*. 2001; 56: 143-145.

Comments:

| Bibliographic citation                                                                                                                                                                                                   | Study type | Ev lev | Number patients | Patient characteristics | Intervention             | Comparison           | Length of follow up | Outcome measures | Effect size               | Source of funding |
|--------------------------------------------------------------------------------------------------------------------------------------------------------------------------------------------------------------------------|------------|--------|-----------------|-------------------------|--------------------------|----------------------|---------------------|------------------|---------------------------|-------------------|
| Greening NJ, Evans RA, Williams JEA, <i>et al</i> . Does body mass index influence the outcomes of a walking-based pulmonary rehabilitation programme in COPD? <i>Chronic Respiratory Disease</i> . May 2012; 9: 99-106. | Cohort     | 2+     | 601             | COPD. GOLD II-IV        | Pulmonary rehabilitation | Across different BMI | 6 weeks             | ISWT, ESWT, CRDQ | Similar across all groups | NIHR CLAHRC LNR   |

Comments:

| Bibliographic citation                                                                                                                                                                           | Study type | Ev lev | Number patients | Patient characteristics                                                        | Intervention             | Comparison    | Length of follow up | Outcome measures                                             | Effect size                                                                        | Source of funding                         |
|--------------------------------------------------------------------------------------------------------------------------------------------------------------------------------------------------|------------|--------|-----------------|--------------------------------------------------------------------------------|--------------------------|---------------|---------------------|--------------------------------------------------------------|------------------------------------------------------------------------------------|-------------------------------------------|
| Griffiths TL, Burr ML, Campbell IA <i>et al</i> . Results at 1 year of outpatient multidisciplinary pulmonary rehabilitation: a randomised controlled trial. <i>Lancet</i> . 2000; 355: 362-368. | RCT        | 1++    | 200             | COPD, FEV1 <60% predicted (<20% reversibility), Clinically stable for 2 months | Pulmonary rehabilitation | Control group | 1 year              | Walking capacity, SF-36, HADS, SGRQ, health care utilisation | Reduction in number of hospital days. Increased walking capacity and health status | Wales Office of Research and development. |

Comments:

| Bibliographic citation                                                                                                                  | Study type                       | Ev lev | Number patients                                                                                                    | Patient characteristics                                                                                         | Intervention                                                                                         | Comparison                      | Length of follow up | Outcome measures                   | Effect size                                                                                                                | Source of funding |
|-----------------------------------------------------------------------------------------------------------------------------------------|----------------------------------|--------|--------------------------------------------------------------------------------------------------------------------|-----------------------------------------------------------------------------------------------------------------|------------------------------------------------------------------------------------------------------|---------------------------------|---------------------|------------------------------------|----------------------------------------------------------------------------------------------------------------------------|-------------------|
| Grosbois JM, Lamblin C, Lemaire B, <i>et al</i> . Long-term benefits of exercise maintenance after outpatient rehabilitation program in | Prospective non randomised trial | 2-     | 71 patients allocated to 4 groups. Group A 18, group B 18, Group C 18 and group D 17. 58 patients completed study. | Moderate to severe COPD. Dyspnoea on exertion limiting ADL's, FEV1<70%, stable with optimal drug management, no | Group A – twice a week supervised maintenance exercise, group B – once a week supervised maintenance | Group D no maintenance exercise | 18 months           | FEV1, exercise capacity, dyspnoea. | Significant post rehabilitation deterioration in FEV1 in control group, but maintained in intervention groups. Significant | Not stated        |

patients with chronic obstructive pulmonary disease. *J Cardiopulm Rehab.* 1999; 19(4): 216-225.

IHD or muscular skeletal disorder. exercise, group C, unsupervised home exercise.

difference in exercise capacity at 18 months in favour of intervention groups. No differences in dyspnoea at any point between groups.

**Comments:** Non – randomised – patients self-selected groups. Definite benefits of maintenance compared to no maintenance, No difference between unsupervised and supervised maintenance. Daily home exercise appears to maintain workload as does weekly exercise session. The authors conclude that there were definite benefits of exercise maintenance after outpatient pulmonary rehabilitation. There are limitations within the methodology increasing the risk of selection bias and the study has poor statistical power so can only be coded -.

| Bibliographic citation                                                                                                                                                                                                                             | Study type | Ev lev | Number patients                  | Patient characteristics          | Intervention           | Comparison                                                                                                                  | Length of follow up | Outcome measures | Effect size                                                                                                                                                                                                                         | Source of funding |
|----------------------------------------------------------------------------------------------------------------------------------------------------------------------------------------------------------------------------------------------------|------------|--------|----------------------------------|----------------------------------|------------------------|-----------------------------------------------------------------------------------------------------------------------------|---------------------|------------------|-------------------------------------------------------------------------------------------------------------------------------------------------------------------------------------------------------------------------------------|-------------------|
| Guell MR, de Lucas P, Gáldiz JB, <i>et al.</i> Home vs. hospital-based pulmonary rehabilitation for patients with chronic obstructive pulmonary disease: A Spanish multicenter trial. <i>Archivos de Bronconeumologia</i> . 2008; 44(10): 512-518. | RCT        | 1-     | 51 patient, 28 hospital, 23 home | Moderate to severe (stable) COPD | Exercise and education | 2 education sessions and 4 supervised exercise sessions over 2 weeks and then randomised to home or hospital based exercise | 6 months            | 6MWT, CRDQ       | Both intervention groups improved at 9 weeks and 6 months. 6MWT at 9 weeks, difference = 8.69m (p=0.61), at 6 months difference = 6.55m (p=0.73). CRDQ (D) 9 weeks difference =0.21 (p=0.33), at 6 months difference =0.13 (p=0.65) | Not stated        |

**Comments:** small study-, no power calculation described, probably underpowered, outcome assessment blinded

| Bibliographic citation                                                                                                                                                             | Study type | Ev lev | Number patients                                   | Patient characteristics                                                                    | Intervention                                                         | Comparison | Length of follow up | Outcome measures                                                                      | Effect size                                                                                                                                                             | Source of funding |
|------------------------------------------------------------------------------------------------------------------------------------------------------------------------------------|------------|--------|---------------------------------------------------|--------------------------------------------------------------------------------------------|----------------------------------------------------------------------|------------|---------------------|---------------------------------------------------------------------------------------|-------------------------------------------------------------------------------------------------------------------------------------------------------------------------|-------------------|
| Guell R. Resqueti V, PT, Sanganis M, <i>et al.</i> Impact of pulmonary rehabilitation on psychosocial morbidity in patients with severe COPD. <i>Chest.</i> 2006; 129(4): 899-904. | RCT        | 1-     | Pulmonary rehabilitation = 18, control group = 17 | COPD aged <75 years, FEV1<70% predicted, no home oxygen, no exacerbations in past 2 months | Non-psychologically based 16 week pulmonary rehabilitation programme | Usual care | 16 weeks            | 6MWD, Milton Behavioural Health Inventory, revised Symptom Checklist (SCL-90-R), CRDQ | 6MWD Control = - 22 pulmonary rehabilitation = +63 CRDQ change in scores<br>Dyspnoea: control group -0.2, pulmonary rehabilitation +0.8<br>Fatigue: control group -0.5, | SEPAR             |

pulmonary rehabilitation +0.2  
Emotion: control group -0.4, pulmonary rehabilitation +0.3  
Mastery: control group 0, pulmonary rehabilitation +0.6

**Comments:**

| Bibliographic citation                                                                                                                                                         | Study type                                                   | Ev lev | Number patients                                                                                                                                                                              | Patient characteristics                                                                          | Intervention                                                                                                                                                                  | Comparison                                                                     | Length of follow up | Outcome measures                                                                                                                                                                                                                                                      | Effect size                                                                      | Source of funding                                                                 |
|--------------------------------------------------------------------------------------------------------------------------------------------------------------------------------|--------------------------------------------------------------|--------|----------------------------------------------------------------------------------------------------------------------------------------------------------------------------------------------|--------------------------------------------------------------------------------------------------|-------------------------------------------------------------------------------------------------------------------------------------------------------------------------------|--------------------------------------------------------------------------------|---------------------|-----------------------------------------------------------------------------------------------------------------------------------------------------------------------------------------------------------------------------------------------------------------------|----------------------------------------------------------------------------------|-----------------------------------------------------------------------------------|
| <b>Harris M, Smith BJ, and Veale AJ, et al. Providing reviews of evidence to COPD patients: Controlled prospective 12 month trial . Chronic Resp Dis. 2009; 6 (3):165-173.</b> | Controlled before and after design.<br><br>(Not randomised). | 2-     | 249 included at baseline, intervention arm 125, control arm 124. Pulmonary rehabilitation was explored as a subgroup. Numbers unknown. Completed to 12 months intervention 100, control, 101 | Mod to severe COPD, able to read English. Exclusions, dementia, lung cancer or unstable illness. | Patients were given a manual of evidence (summary of Cochrane reviews) for COPD interventions. The manual contained 'cues' and tips for questions to discuss with the doctor. | Patients who were given a conventional pamphlet containing information re COPD | 12 months           | Enrolment in pulmonary rehabilitation<br>Plus rates of influenza vaccination, rate of bone densitometry testing<br><br>Secondary measures – CRDQ mastery, knowledge of COPD, Communication with usual doctor; satisfaction with disease related information, anxiety. | Enrolment in rehabilitation showed sig change for most socio-disadvantaged group | The Australian commonwealth Dept. of Health and Ageing. TQEH research foundation. |

**Comments:** The authors conclude that providing research evidence to patients with COPD did not lead to an improved application of that evidence, although patients reported they found it useful. There appears to be a significantly higher uptake in pulmonary rehabilitation uptake in the intervention group, but only in the higher socioeconomic disadvantaged group. Pulmonary rehabilitation uptake was one of 3 self-management applications that were addressed in this study and numbers of patients in this subgroup are not reported. It is therefore difficult to apply the findings to the guideline question, however the study adds to the body of evidence supporting the hypothesis that pre-rehabilitation interventions may increase uptake. Differences in groups at baseline – 19 patients in intervention group (compared to 3 in control group) had previously attended pulmonary rehabilitation. Socioeconomic disadvantage appeared to be a modifier.

| Bibliographic citation                                                                                                                                   | Study type | Ev lev | Number patients                | Patient characteristics                                                                                                                        | Intervention                                                                                                                                      | Comparison | Length of follow up                                                                                 | Outcome measures                                                                                                     | Effect size                                                                                                                                                  | Source of funding                                                            |
|----------------------------------------------------------------------------------------------------------------------------------------------------------|------------|--------|--------------------------------|------------------------------------------------------------------------------------------------------------------------------------------------|---------------------------------------------------------------------------------------------------------------------------------------------------|------------|-----------------------------------------------------------------------------------------------------|----------------------------------------------------------------------------------------------------------------------|--------------------------------------------------------------------------------------------------------------------------------------------------------------|------------------------------------------------------------------------------|
| <b>Hawkins P, Johnson LC, Nikolettou D, et al Proportional assist ventilation as an aid to exercise training in severe COPD. Thorax. 2002; 57:853-9.</b> | RCT        | 1-     | 10 intervention and 9 controls | COPD severe FEV1 mean 27% predicted -all men bar 2 in the control group who were women. PaCO2 mean 5.8 kPa at baseline so not type II failure. | Proportional assist ventilation via BiPAP mean first volume assist at 12.7 cms H2O exercise cycle ergometer three times a week for 6 weeks for 30 | Unassisted | Tested two days before start of programme and on two days in the week after the programme completed | Spirometry lactate peak heart rate peak work rate training intensity as weight/work peak all as change from baseline | The ventilation assist group had a statistically significant increased weight/wpeak at 6 weeks (CI 3.2-27.1) p=0.016) as did work rate after training in the | British Lung Foundation and Respirationics who also provided the ventilators |

minutes a session with progressive increase of work rate over the time course of the programme

assist group 18.5% increase p=0.005 and lactate at same work rate was significantly less (reduced by 30% p=0.002) compared to baseline

Comments: Small unblinded study

| Bibliographic citation                                                                                                                                                                | Study type | Ev lev | Number patients                     | Patient characteristics                                                                                                              | Intervention                                                                            | Comparison                                                                                                                 | Length of follow up | Outcome measures                                                                                                                         | Effect size                                                                                                                                                                                                                                                                                                                                                                                                                                                                                                       | Source of funding |
|---------------------------------------------------------------------------------------------------------------------------------------------------------------------------------------|------------|--------|-------------------------------------|--------------------------------------------------------------------------------------------------------------------------------------|-----------------------------------------------------------------------------------------|----------------------------------------------------------------------------------------------------------------------------|---------------------|------------------------------------------------------------------------------------------------------------------------------------------|-------------------------------------------------------------------------------------------------------------------------------------------------------------------------------------------------------------------------------------------------------------------------------------------------------------------------------------------------------------------------------------------------------------------------------------------------------------------------------------------------------------------|-------------------|
| Heppner PS, Morgan C, Kaplan RM, Ries AL. Regular walking and long-term maintenance of outcomes after pulmonary rehabilitation. Journal of Cardiopulmonary Rehab. 2006; 26(1): 44-53. | RCT        | 1-     | 164 patients randomised to 2 groups | 107 patients had mod – severe COPD, 16 had either restrictive lung disease or mixture of restrictive and obstructive Mean FEV1 = 47% | 12 months maintenance programme. Weekly telephone calls and monthly supervised sessions | 12 months standard care – referral back to health care provider, documented homecare programme and monthly alumni meetings | 24 months           | Walking frequency<br>HRQOL<br>Dyspnoea<br>6MWD<br>Self-efficacy for walking<br>Hospital in patient days<br>emergency room visits<br>FEV1 | 44% of maintenance group were found to be regular walkers, 38% of control group. Therefore data was pooled from those groups in order to focus on regularity of walking. At 12 months, regular walkers had sig better HRQOL than irregular walkers (p=0.01) Post rehabilitation decline in dyspnoea occurred less in regular walking group than irregular walking group (p= 0.01) No differences in rate of decline in 6MWD between groups. Regular walkers maintained post rehabilitation self-efficacy compared | Not stated        |



to irregular  
walkers (p=0.01)

Comments: The subjects from the original study and control groups were pooled. Regular walking was associated with long term maintenance of the functional benefits of a pulmonary rehabilitation programme. Regular walkers had better HRQOL, less impairments from dyspnoea and better self-efficacy for walking. Monthly supervised reinforcement sessions made no difference to whether patients became regular walkers or not. This study gives limited information but does suggest that regular walking may be a protective factor for the loss of benefits following pulmonary rehabilitation. The study was originally designed to explore the effects of maintenance on outcomes. The data about walking was observed at completion of the study. This raises the possibility of confounders.

| Bibliographic citation                                                                                                                                                                   | Study type | Ev lev | Number patients | Patient characteristics                                                                                                | Intervention                | Comparison | Length of follow up | Outcome measures                                                                                                         | Effect size                                                                                                                                      | Source of funding          |
|------------------------------------------------------------------------------------------------------------------------------------------------------------------------------------------|------------|--------|-----------------|------------------------------------------------------------------------------------------------------------------------|-----------------------------|------------|---------------------|--------------------------------------------------------------------------------------------------------------------------|--------------------------------------------------------------------------------------------------------------------------------------------------|----------------------------|
| Hoff J, Tjønnna AE, Steinshamn S, <i>et al.</i> Maximal strength training of the legs in COPD: a therapy for mechanical inefficiency. <i>J. Med Sci Sports Exerc.</i> 2007; 39(2):220-6. | RCT        | 1+     | 12              | COPD (GOLD guidelines), age 40-70, FEV1 <60%. Metabolic disease, cardiovascular disease, steroid use in last 6 months. | 8 weeks resistance training | Control    | 8 weeks             | Pulmonary function tests, haemoglobin, lactate, 1RM strength, rate of force development (70% 1RM), mechanical efficiency | 36 Kg 1RM increase, 1957 N/s increase dynamic rate of force development, 332 N increase in static peak force, no increase in dynamic peak force. | Norwegian Research Council |

Comments:

| Bibliographic citation                                                                                                                                                                           | Study type | Ev lev                        | Number patients               | Patient characteristics              | Intervention                            | Comparison               | Length of follow up | Outcome measures                                                                       | Effect size                                                                                                                                                                                                                                                                                                                                             | Source of funding                           |
|--------------------------------------------------------------------------------------------------------------------------------------------------------------------------------------------------|------------|-------------------------------|-------------------------------|--------------------------------------|-----------------------------------------|--------------------------|---------------------|----------------------------------------------------------------------------------------|---------------------------------------------------------------------------------------------------------------------------------------------------------------------------------------------------------------------------------------------------------------------------------------------------------------------------------------------------------|---------------------------------------------|
| Holland A, Hill CJ, Conron M, <i>et al.</i> Short-term improvement in exercise capacity and symptoms following exercise training in interstitial lung disease. <i>Thorax.</i> 2008; 63: 549-554. | RCT        | 1+<br><br>(but only exercise) | 57 patients with ILD (34 IPF) | Patients attending hospital with ILD | 8 weeks of supervised exercise training | Weekly telephone support | 26 weeks            | Functional exercise capacity, maximal exercise capacity, quality of life and dyspnoea. | 6MWD increased (mean difference to control 35m, 95% CI 6 to 64 m). A significant reduction in MRC (0.7 points, 95% CI 0.1 to 1.3); dyspnoea improved (p=0.04) and fatigue (p<0.01) on CRDQ. Exercise training reduced heart rate at maximum isowork load (p=0.01). After 6 months no differences between the training and control group for any outcome | Victoria Tuberculosis and Lung Association. |

variable.

**Comments: Small numbers. Exercise training improves exercise capacity and symptoms in patients with ILD, but these benefits are not sustained 6 months following intervention.**

| Bibliographic citation                                                                                                                                                                             | Study type | Ev lev | Number patients           | Patient characteristics      | Intervention                                                                                                                                 | Comparison                       | Length of follow up             | Outcome measures | Effect size                                                                                                                                                                                                                           | Source of funding |
|----------------------------------------------------------------------------------------------------------------------------------------------------------------------------------------------------|------------|--------|---------------------------|------------------------------|----------------------------------------------------------------------------------------------------------------------------------------------|----------------------------------|---------------------------------|------------------|---------------------------------------------------------------------------------------------------------------------------------------------------------------------------------------------------------------------------------------|-------------------|
| Johnson JE, Gavin DJ, Adams-Dramiga S. Effects of training with heliox and noninvasive positive pressure ventilation on exercise ability in patients with severe COPD. Chest. 2002; 122(2):464-72. | RCT        | 1-     | 39 enrolled. 32 completed | COPD with FEV1<50% predicted | 6 weeks pulmonary rehabilitation with supplemental Heliox (79% helium, 21% oxygen), or supplemental bi-level pressure support NIV (8-12 / 2) | 6 weeks pulmonary rehabilitation | End of pulmonary rehabilitation | Treadmill test;  | No effect with Heliox. NIV increased exercise time and workload acutely. NIV during training increased %change in unassisted exercise time (89.6+/-57.7 versus 37+/-33%; p=0.016) but not workload compared with unassisted training. | Not stated        |

**Comments: Not double-blind; Underpowered to see clinically meaningful improvements; very low NIV pressures used. More dropped out in NIV group. No information about randomisation process.**

| Bibliographic citation                                                                                                                                                                                                                  | Study type   | Ev lev | Number patients                        | Patient characteristics                                                   | Intervention                              | Comparison                 | Length of follow up | Outcome measures                                                                 | Effect size                                                                                                                                                                                                                                 | Source of funding |
|-----------------------------------------------------------------------------------------------------------------------------------------------------------------------------------------------------------------------------------------|--------------|--------|----------------------------------------|---------------------------------------------------------------------------|-------------------------------------------|----------------------------|---------------------|----------------------------------------------------------------------------------|---------------------------------------------------------------------------------------------------------------------------------------------------------------------------------------------------------------------------------------------|-------------------|
| Kayahan B, Karapolat H, Atyntoprak E, et al. <i>et al.</i> Psychological outcomes of an outpatient pulmonary rehabilitation program in patients with chronic obstructive pulmonary disease. Respiratory Medicine. 2006; 100(6): 1050-7. | Cohort study | 2-     | 26 pulmonary rehabilitation 19 control | COPD aged 50-75yrs, COPD, smoked >20yrs, no exacerbations in past 8 weeks | 8 week pulmonary rehabilitation programme | usual care - not described | 8 weeks             | HAM - A (anxiety measure) HAM - D (depression measure), dyspnoea VAS, 6MWD, SGRQ | HAM -A (anxiety measure) pulmonary rehabilitation = - 3.04, control = + 0.82 p=0.042 (between group); 6MWD pulmonary rehabilitation = +121.54m, control = + 15.12m p<0.05; SGRQ pulmonary rehabilitation = - 16.79, control = - 3.65 p<0.05 | Not stated        |

**Comments:**

| Bibliographic citation              | Study type | Ev lev | Number patients | Patient characteristics            | Intervention             | Comparison            | Length of follow up | Outcome measures | Effect size                | Source of funding                |
|-------------------------------------|------------|--------|-----------------|------------------------------------|--------------------------|-----------------------|---------------------|------------------|----------------------------|----------------------------------|
| Ko FW, Dai DL, Ngai J, <i>et al</i> | RCT        | 1+     | 30 in each arm, | Patients admitted to hospital with | Pulmonary rehabilitation | Usual care to include | 1 year following    | 6MWD MRC         | No statistical differences | Hong Kong lung foundation grant. |

Effect of early pulmonary rehabilitation on health care utilization and health status in patients hospitalised with acute exacerbations of COPD. *Respirology*. 2011; 16: 617-624.

acute exacerbation COPD. FEV1/FVC ratio <70%, FEV1<70%, Over 40 years. Exclusions: major joint problems and severe angina, or who had attended pulmonary rehabilitation in preceding year.

programme group 3 times a week for 8 weeks

instruction to patient to do home walking

discharge

Borg SGRQ CPE acute exacerbation COPD Hospitalisations A and E visits

between groups in any parameter. SGRQ was statistically better in the pulmonary rehabilitation group (p=0.04). Trend towards fewer admissions in first 3 months in pulmonary rehabilitation programme group but this diminished over time.

Respiratory research fund Chinese university of Hong Kong

Comments: Conclusions – better HRQOL in pulmonary rehabilitation programme up to 6 months without reduction in healthcare utilization at 1 year. Patients not medically optimised prior to pulmonary rehabilitation.

| Bibliographic citation                                                                                                                                                                                                                 | Study type | Ev lev | Number patients | Patient characteristics                                                                                         | Intervention                | Comparison                    | Length of follow up | Outcome measures                                                                          | Effect size                        | Source of funding |
|----------------------------------------------------------------------------------------------------------------------------------------------------------------------------------------------------------------------------------------|------------|--------|-----------------|-----------------------------------------------------------------------------------------------------------------|-----------------------------|-------------------------------|---------------------|-------------------------------------------------------------------------------------------|------------------------------------|-------------------|
| Kongsgaard M, Backer V, Jørgensen K <i>et al</i> . Heavy resistance training increases muscle size, strength and physical function in elderly male COPD-patients—a pilot study. <i>Respiratory Medicine</i> . 2004; 98 (10):1000-1007. | RCT        | 1-     | 18              | COPD, Age 65-80, non lower limb fracture in previous 6 months, dependence on more than one walking devise, male | 4 sets of 8 reps at 80% 1RM | Control (breathing exercises) | 12 weeks            | Isometric and isokinectic strength, 5RM strength, lung function, ADLs, Gait climbing time | 37% increase in 5RM quads strength | Not stated        |

Comments: Male only. Per protocol analysis

| Bibliographic citation                                                                                                                                                                         | Study type               | Ev lev | Number patients | Patient characteristics                                                                                     | Intervention                                                              | Comparison | Length of follow up | Outcome measures                       | Effect size                                                                                                                                                 | Source of funding                                                                |
|------------------------------------------------------------------------------------------------------------------------------------------------------------------------------------------------|--------------------------|--------|-----------------|-------------------------------------------------------------------------------------------------------------|---------------------------------------------------------------------------|------------|---------------------|----------------------------------------|-------------------------------------------------------------------------------------------------------------------------------------------------------------|----------------------------------------------------------------------------------|
| Kovelis D, Zabatiero J, Oldenberg N, <i>et al</i> . Responsiveness of three instruments to assess self-reported functional status in patients with COPD. <i>Journal of COPD</i> . 2011; 8:334- | Prospective cohort study | 2-     | 22              | Confirmed diagnosis of COPD according to GOLD, stable disease, no other comorbidities that would impair ADL | 12 week training programme of 1 hour sessions attending 3 times per week. | None       | 12 weeks            | PFSDQ-M, LCADL, MRC scale, SRGQ, 6 MWD | PFSDQ-M: Dyspnoea 0.26, Fatigue 0.16, change in ADL 0.33<br>LCADL: self-care = 0.6, domestic 0.26, Activity= 0.61, leisure = 0.61, total= 0.45:<br>MR= 0.36 | Grant from National Council for Scientific and Technological Development, Brazil |

| 9.                                                                                                                                                                                                                    |                                     |        |                                           |                                                                |                                                                                                                                                       |                                                  |                     |                                                 |                                                                                                                                               |                   |
|-----------------------------------------------------------------------------------------------------------------------------------------------------------------------------------------------------------------------|-------------------------------------|--------|-------------------------------------------|----------------------------------------------------------------|-------------------------------------------------------------------------------------------------------------------------------------------------------|--------------------------------------------------|---------------------|-------------------------------------------------|-----------------------------------------------------------------------------------------------------------------------------------------------|-------------------|
| Comments:                                                                                                                                                                                                             |                                     |        |                                           |                                                                |                                                                                                                                                       |                                                  |                     |                                                 |                                                                                                                                               |                   |
| Bibliographic citation                                                                                                                                                                                                | Study type                          | Ev lev | Number patients                           | Patient characteristics                                        | Intervention                                                                                                                                          | Comparison                                       | Length of follow up | Outcome measures                                | Effect size                                                                                                                                   | Source of funding |
| Kubo H, Honda N, Tsuji F, <i>et al.</i><br>Effects of dietary supplements on the Fischer ratio before and after pulmonary rehabilitation. Asia Pac J Clin Nutr. 2006 15;(4): 551-55.                                  | Intervention trial                  | 2-     | 8 (7 male) Arm 1; 4 male<br>Arm 2; 3 male | COPD (Emphysema)<br>Stable                                     | 4 grams protein (Branched chain amino acids) contained in 200ml liquid supplement drink<br>+pulmonary rehabilitation (1 session per week for 8 weeks) | Pulmonary rehabilitation alone (as intervention) | 8 weeks             | 6 MWD, QOL (CRDQ), Fischer ratio, Serum albumin | Results only provided in graphical format. No numerical data provided.                                                                        | Not stated        |
| Comments: Not randomised or blinded. Very small. No statistical analysis details. Diet self-reported therefore increasing variability, no data regarding compliance with home exercise, no measure of lean tissue.    |                                     |        |                                           |                                                                |                                                                                                                                                       |                                                  |                     |                                                 |                                                                                                                                               |                   |
| Bibliographic citation                                                                                                                                                                                                | Study type                          | Ev lev | Number patients                           | Patient characteristics                                        | Intervention                                                                                                                                          | Comparison                                       | Length of follow up | Outcome measures                                | Effect size                                                                                                                                   | Source of funding |
| Lan CC, Yang MC, Lee CH, <i>et al.</i><br>Pulmonary rehabilitation improves exercise capacity and quality of life in underweight patients with chronic obstructive pulmonary disease. Respiriology. 2011; 16: 276-83. | Controlled trial (non-randomised)   | 1-     | 44                                        | COPD, stable for 3 months.                                     | Pulmonary rehabilitation                                                                                                                              | Underweight versus non-underweight               | 12 weeks            | Weight (secondary). CPE (primary), SGRQ.        | Underweight group increased weight by 0.8kg. Significant improvements in peak VO2. No significant difference in peak workload between groups. | Not stated        |
| Comments:                                                                                                                                                                                                             |                                     |        |                                           |                                                                |                                                                                                                                                       |                                                  |                     |                                                 |                                                                                                                                               |                   |
| Bibliographic citation                                                                                                                                                                                                | Study type                          | Ev lev | Number patients                           | Patient characteristics                                        | Intervention                                                                                                                                          | Comparison                                       | Length of follow up | Outcome measures                                | Effect size                                                                                                                                   | Source of funding |
| Lacasse Y, Goldstein R, Lasserson TJ, <i>et al.</i><br>Pulmonary rehabilitation for chronic obstructive pulmonary disease. Cochrane Database of Systematic                                                            | Systematic review and meta-analysis | 1++    | CRDQ n=618, SGRQ n=384, 6MWD n=669        | Clinical diagnosis of COPD, >90% had COPD, FEV1 <70% predicted | Comprehensive pulmonary rehabilitation                                                                                                                | Usual care                                       | 6 weeks to one year | CRDQ, SGRQ, 6MWD                                | Improvements in CRDQ (range from 0.76- 1.06), SGRQ (range from 4.68-6.27), 6MWD 48m                                                           | None              |

Reviews. 2006.  
DOI:  
10.1002/14651858.  
CD003793.pub2.

Comments:

| Bibliographic citation                                                                                                                                                                      | Study type | Ev lev | Number patients                                            | Patient characteristics                      | Intervention                                                                                                                       | Comparison                                     | Length of follow up | Outcome measures                                                                           | Effect size                                                                                                                                                   | Source of funding                                                                   |
|---------------------------------------------------------------------------------------------------------------------------------------------------------------------------------------------|------------|--------|------------------------------------------------------------|----------------------------------------------|------------------------------------------------------------------------------------------------------------------------------------|------------------------------------------------|---------------------|--------------------------------------------------------------------------------------------|---------------------------------------------------------------------------------------------------------------------------------------------------------------|-------------------------------------------------------------------------------------|
| Larson JL, Covey MK, Wirtz SE, <i>et al.</i> Cycle Ergometer and Inspiratory Muscle Training in chronic obstructive pulmonary disease. <i>Am J Respir Crit Care Med.</i> 1999; 160:500-507. | RCT        | 1-     | 53 total: 13 IMT; 14 CET; 14 CET &IMT; 12 health education | Moderate to severe COPD by usual definitions | [4 months of] IMT: threshold loading device with incremental resistance to 60% Pimax; CET: 5 days a week on bike, tailor programme | Health education (general and related to COPD) | End of intervention | Pimax; CPEX outcomes; submaximal ET outcomes; respiratory muscle endurance; dyspnoea score | No clear difference in VO2; no difference in CRDQ; improvement in Rating of Perceived Breathlessness and Rating of Perceived Leg Fatigue of 20% versus no CET | National Institute of Nursing Research, National Institutes of Health, RO1-NR01428. |

Comments: Randomisation and blinding not described. Analyses appear to be against baseline. No clear primary outcome and no adjustment for multiple testing

| Bibliographic citation                                                                                                                                                                                          | Study type  | Ev lev | Number patients       | Patient characteristics                                     | Intervention                                     | Comparison                                        | Length of follow up | Outcome measures | Effect size                                                                                                  | Source of funding |
|-----------------------------------------------------------------------------------------------------------------------------------------------------------------------------------------------------------------|-------------|--------|-----------------------|-------------------------------------------------------------|--------------------------------------------------|---------------------------------------------------|---------------------|------------------|--------------------------------------------------------------------------------------------------------------|-------------------|
| Liddell F, Webber J. Pulmonary rehabilitation for chronic obstructive pulmonary disease: a pilot study evaluating a once weekly versus twice weekly supervised programme. <i>Physiotherapy.</i> 2010; 96:68-74. | Pilot study | 3      | 30 patients with COPD | COPD patients on waiting list for pulmonary rehabilitation. | Once weekly pulmonary rehabilitation for 8 weeks | Twice weekly pulmonary rehabilitation for 8 weeks | Not stated          | ISWT, ESWT, SGRQ | Significantly underpowered.<br><br>ITT median (IQR) ISWT: once weekly: 60 (0 - 70)m; twice weekly 50 (0-60)m | Not stated        |

Comments: Pilot feasibility study enrolling 36 patients, 6 excluded at commencement of study and only 20 patients completed study. Limitations due to small numbers. Recommended further research to demonstrate whether once weekly pulmonary rehabilitation is as effective as twice weekly.

| Bibliographic citation                                                                                                            | Study type | Ev lev | Number patients | Patient characteristics                                     | Intervention                                                 | Comparison       | Length of follow up | Outcome measures      | Effect size                                                                          | Source of funding               |
|-----------------------------------------------------------------------------------------------------------------------------------|------------|--------|-----------------|-------------------------------------------------------------|--------------------------------------------------------------|------------------|---------------------|-----------------------|--------------------------------------------------------------------------------------|---------------------------------|
| Lindsay, M, Lee A, Poon P, <i>et al.</i> Does pulmonary rehabilitation give additional benefit over tiotropium therapy in primary | RCT        | 1-     | 50              | COPD patients (FEV1 <80% predicted and FEV1/FVC ratio < 70% | 18mcg tiotropium +6 weeks pulmonary rehabilitation programme | 18mcg tiotropium | 3 months            | FEV1, 6MWD, VAS, CRDQ | 6MWD – Pulmonary rehabilitation- +22.98 metres, control- +30.8 m; (NS) CRDQ dyspnoea | Chinese University of Hong Kong |

care management of chronic obstructive pulmonary disease? Randomized controlled clinical trial in Hong Kong Chinese. *Journal of Clinical Pharmacy & Therapeutics*. 2005; 30(6): 567-73.

Pulmonary rehabilitation- +1.18 Control +1.12 (NS); CRDQ fatigue Pulmonary rehabilitation- +0.38, control +0.28 (NS); CRDQ emotional Pulmonary rehabilitation - +0.38 control 0.28 (NS); CRDQ mastery Pulmonary rehabilitation - +0.34, control +0.34 (NS)

**Comments:**

| Bibliographic citation                                                                                                                                                                     | Study type | Ev lev | Number patients                                         | Patient characteristics                                  | Intervention                                                                       | Comparison                                                               | Length of follow up | Outcome measures                                        | Effect size                                                                         | Source of funding                 |
|--------------------------------------------------------------------------------------------------------------------------------------------------------------------------------------------|------------|--------|---------------------------------------------------------|----------------------------------------------------------|------------------------------------------------------------------------------------|--------------------------------------------------------------------------|---------------------|---------------------------------------------------------|-------------------------------------------------------------------------------------|-----------------------------------|
| Mador MJ, Deniz O, Aggarwal A, <i>et al</i> Effect of Respiratory Muscle Endurance Training in Patients with COPD Undergoing Pulmonary Rehabilitation. <i>Chest</i> . 2005; 128:1216-1224. | RCT        | 1-     | 29 total: 15 combined 14 pulmonary rehabilitation alone | Description of COPD but no threshold for inclusion given | 8 weeks. Standard pulmonary rehabilitation programme plus normocapnoeic hyperpnoea | Standard pulmonary rehabilitation programme including endurance training | End of intervention | CRDQ; CPEX outcomes; respiratory muscle endurance/Pimax | Improvement with IMT greater for respiratory muscle endurance (20%) and Pimax (10%) | Swiss National Science Foundation |

Comments: Per protocol analyses only (9 drop-outs). Randomisation and blinding not described, classes of 3-5 not individuals randomised.

| Bibliographic citation                                                                                                                                | Study type | Ev lev | Number patients | Patient characteristics                                                                                                           | Intervention | Comparison                                                                    | Length of follow up | Outcome measures                                                                                           | Effect size                                                                               | Source of funding                       |
|-------------------------------------------------------------------------------------------------------------------------------------------------------|------------|--------|-----------------|-----------------------------------------------------------------------------------------------------------------------------------|--------------|-------------------------------------------------------------------------------|---------------------|------------------------------------------------------------------------------------------------------------|-------------------------------------------------------------------------------------------|-----------------------------------------|
| Man WD, Grant A, Hogg L, <i>et al</i> . Pulmonary rehabilitation in patients with MRC Dyspnoea scale 2. <i>Thorax</i> . 2011; 66:263 doi:10.1136/thx. | Cohort     | 3      | 442             | 45% male patients with COPD who completed pulmonary rehabilitation. 126 patients MRC2 vs. 316 patients MRC3-4. MRC2 58% pred. Vs. | All subjects | 8 week pulmonary rehabilitation- 2 supervised and 1 unsupervised session/week | NA                  | Comparison of group response based on MRC2 vs. MRC3-4. Outcome measures exercise capacity (ISWT), dyspnoea | No significant difference outcomes MRC2 vs. MRC3-4. Mean ISWT improvement 83(7)m MRC2 vs. | National Institute for Lung Research UK |

2010.136085.

MRC3-4 54%

(CRDQ-D) and anxiety/depression (HAD)

68(5)m MRC3-4. CRDQ-D improvement 0.75(0.11) MRC2 vs. 0.75(0.07) MRC3-4. Similar median HAD-A and HAD-D improvement

Comments: Patients with baseline MRC2 dyspnoea gain similar improvement in walking distance and breathlessness as MRC3-4 patients

| Bibliographic citation                                                                                                                                                                                                                    | Study type | Ev lev | Number patients                           | Patient characteristics          | Intervention | Comparison                                                                                                                  | Length of follow up | Outcome measures                                     | Effect size                                                                                             | Source of funding                                                                                                  |
|-------------------------------------------------------------------------------------------------------------------------------------------------------------------------------------------------------------------------------------------|------------|--------|-------------------------------------------|----------------------------------|--------------|-----------------------------------------------------------------------------------------------------------------------------|---------------------|------------------------------------------------------|---------------------------------------------------------------------------------------------------------|--------------------------------------------------------------------------------------------------------------------|
| Maltais F, Bourbeau J, Shapiro S, <i>et al.</i> Effects of home-based pulmonary rehabilitation in patients with chronic obstructive pulmonary disease: A randomized trial. <i>Annals of Internal Medicine.</i> 2008; 149(12): p. 869-878. | RCT        | 1+     | Baseline = 252 Outpatient<br>126 Home 126 | Moderate to severe (stable) COPD | Exercise     | Outpatient vs. home based programme. Centre based education - followed by randomisation to either home or hospital exercise | 1 year              | CRDQ, SGRQ, spirometry, 6MWT, incremental cycle test | Non-inferiority study - Primary outcome between group difference at 3 months 0.05(-0.21 to 0.29) p=0.74 | Canadian Institute of health Research & Respiratory Health Network of the Fonds de la Recherche en sante de Quebec |

Comments: Designed and powered as a non-inferiority study but outcomes not blinded, therefore increased risk of bias

| Bibliographic citation                                                                                                                                                                                                    | Study type | Ev lev | Number patients                                                  | Patient characteristics          | Intervention | Comparison                                                                   | Length of follow up | Outcome measures               | Effect size                                                                             | Source of funding                                                                                                                                 |
|---------------------------------------------------------------------------------------------------------------------------------------------------------------------------------------------------------------------------|------------|--------|------------------------------------------------------------------|----------------------------------|--------------|------------------------------------------------------------------------------|---------------------|--------------------------------|-----------------------------------------------------------------------------------------|---------------------------------------------------------------------------------------------------------------------------------------------------|
| Mendes De Oliveira JC, Filho FS, Sampaio LM, <i>et al.</i> Outpatient vs. home-based pulmonary rehabilitation in COPD: A randomized controlled trial. <i>Multidisciplinary Respiratory Medicine,</i> 2010; 5(6): 401-408. | RCT        | 1-     | 117 patients: 42 home rehabilitation, 46 outpatient, 29 control, | Moderate to severe (stable) COPD | Exercise     | Exercise at home or hospital (all received education prior to randomisation) | 12 weeks            | 6 minute walking test and BODE | No significant difference between intervention groups for 6MWT(p=0.44) &, BODE (p=0.90) | Brazilian fostering agencies Fundação de Amparo a Pesquisa do Estado de São Paulo. Conselho Nacional de Desenvolvimento Científico e Tecnológico. |

Comments: Poorly described power calculation, not blind outcome assessment, no assessment of HRQOL

| Bibliographic citation | Study type | Ev lev | Number patients | Patient characteristics | Intervention | Comparison | Length of follow up | Outcome measures | Effect size | Source of funding |
|------------------------|------------|--------|-----------------|-------------------------|--------------|------------|---------------------|------------------|-------------|-------------------|
|------------------------|------------|--------|-----------------|-------------------------|--------------|------------|---------------------|------------------|-------------|-------------------|

|                                                                                                                                                                                                  |                  |                        |                  |                                                                                                |                                                                                                |                                                                |        |                                                                                                   |                                                                                                  |                                                                                                                                                                                                              |
|--------------------------------------------------------------------------------------------------------------------------------------------------------------------------------------------------|------------------|------------------------|------------------|------------------------------------------------------------------------------------------------|------------------------------------------------------------------------------------------------|----------------------------------------------------------------|--------|---------------------------------------------------------------------------------------------------|--------------------------------------------------------------------------------------------------|--------------------------------------------------------------------------------------------------------------------------------------------------------------------------------------------------------------|
| <b>Moullec G, Ninot G, Varray A, et al.</b><br>An innovative maintenance follow-up programme after a first in patient pulmonary rehabilitation. <i>Respiratory Medicine</i> . 2008; 102:556-566. | Controlled trial | 1-(but not randomised) | 40; 27 completed | Moderate to severe COPD<br><br>Exclusions: LTOT or significant medical / psychiatric disorders | Maintenance: exercise (3.5h/week) health education (2h/month), psychosocial support (1h/month) | Letter outlining standard recommended care post rehabilitation | 1 year | Primary: 6MWD<br><br>Secondary included QOL, maximal exercise test, physical activity, attendance | Change in ISWT: 75.8 (32-119.6)m favouring maintenance QOL (SGRQ: Symptoms): -18.5 (-30.9, -6.2) | Fond d'Aide à la Qualité des Soins de Ville (FAQSV) of the Union Régionale des Caisses d'Assurance Maladie (URCAM). Agence Régionale de l'Hospitalisation (ARH) of the region Languedoc-Roussillon in France |
|--------------------------------------------------------------------------------------------------------------------------------------------------------------------------------------------------|------------------|------------------------|------------------|------------------------------------------------------------------------------------------------|------------------------------------------------------------------------------------------------|----------------------------------------------------------------|--------|---------------------------------------------------------------------------------------------------|--------------------------------------------------------------------------------------------------|--------------------------------------------------------------------------------------------------------------------------------------------------------------------------------------------------------------|

Comments: No comment re blinding or randomisation. Consecutive assignment not random allocation. Small, underpowered study. Outcomes well described. The intense maintenance strategy appears to offer significant benefit. In the UK, this might be considered to be year-long rehabilitation. However it demonstrates that with continued supervision of exercise benefits are maintained and improved upon after the initial in-patient phase of rehabilitation.

| Bibliographic citation                                                                                                                                       | Study type | Ev lev | Number patients                                                                                                                                                                              | Patient characteristics                                                                                    | Intervention                                                                             | Comparison                                                                                          | Length of follow up | Outcome measures                                                                                                                    | Effect size                                                                                                                                                                                                                                                                                                                                                      | Source of funding |
|--------------------------------------------------------------------------------------------------------------------------------------------------------------|------------|--------|----------------------------------------------------------------------------------------------------------------------------------------------------------------------------------------------|------------------------------------------------------------------------------------------------------------|------------------------------------------------------------------------------------------|-----------------------------------------------------------------------------------------------------|---------------------|-------------------------------------------------------------------------------------------------------------------------------------|------------------------------------------------------------------------------------------------------------------------------------------------------------------------------------------------------------------------------------------------------------------------------------------------------------------------------------------------------------------|-------------------|
| <b>Newall C, Stockley RA, Hill SL.</b> Exercise training and respiratory muscle training in patients with bronchiectasis. <i>Thorax</i> . 2005; 60: 943-948. | RCT        | 1-     | 32 randomised to 3 groups<br>2 patients dropped out during the training programme from each training group, a further 2 in each training group dropped out during the follow up. 6 in total. | Patients with bronchiectasis confirmed by high resolution computed tomography.<br><br>Excluded if COPD too | Pulmonary rehabilitation plus inspiratory muscle training (12 patients - 9 at follow-up) | Pulmonary rehabilitation with sham IMT (11, 8 at follow-up) & a control group (no intervention - 9) | 3 months            | Lung function, respiratory muscle strength, ISWT, maximal incremental treadmill test, submaximal exercise test, SGRQ, sputum volume | Changes in ISWT in both pulmonary rehabilitation groups at 3 months 96.7 (59.6 to 133.7) m in pulmonary rehabilitation plus sham IMT. 124.5 (63.2 to 185.9)m in pulmonary rehabilitation IMT no change in control 11.0 (216.9 to 38.9) 0.002<br>Changes statistically significant between both pulmonary rehabilitation groups and control not between pulmonary | Not stated        |



rehabilitation  
groups

Comments: Table 1 is misleading- says baseline characteristics of 32 who completed, results indicate only 27 patients completed (17 in total in both pulmonary rehabilitation groups). Compared to control pulmonary rehabilitation was effective at improving exercise tolerance in bronchiectasis. Randomisation computer generated. No discussion of blinding. Study underpowered to detect additional effects of IMT on the pulmonary rehabilitation.

| Bibliographic citation                                                                                                                                                                          | Study type | Ev lev | Number patients | Patient characteristics                                                                                             | Intervention                                                                  | Comparison | Length of follow up | Outcome measures                                                                              | Effect size                                                       | Source of funding |
|-------------------------------------------------------------------------------------------------------------------------------------------------------------------------------------------------|------------|--------|-----------------|---------------------------------------------------------------------------------------------------------------------|-------------------------------------------------------------------------------|------------|---------------------|-----------------------------------------------------------------------------------------------|-------------------------------------------------------------------|-------------------|
| Ninot G, Moullec G, Picot MC, <i>et al.</i> Cost-saving effect of supervised exercise associated to COPD self-management education program. <i>Respiratory Medicine</i> , 2011; 105(3): 377-85. | RCT        | 1-     | 38              | 61-65 years old, principally male (84%), FEV1 % pred = 55%, 6MWT= 397 (usual care), 450 (intervention), SGRQ= 41-44 | 4 weeks pulmonary rehabilitation (cycle exercise + self-management education) | Usual care | 12 months           | 6MWT, SGRQ, Voorrips score, Cycle workload, Nottingham health profile, healthcare utilisation | Significant increase in 6MWT, SGRQ symptom domain, Voorrips score | Hospital          |

Comments: Some statistical question remains. Outcomes at one year. No post pulmonary rehabilitation measures done.

| Bibliographic citation                                                                                                                                                        | Study type | Ev lev | Number patients                                                                                                            | Patient characteristics                                                                                              | Intervention                       | Comparison                   | Length of follow up | Outcome measures                                      | Effect size                                                                                                               | Source of funding                                                                                   |
|-------------------------------------------------------------------------------------------------------------------------------------------------------------------------------|------------|--------|----------------------------------------------------------------------------------------------------------------------------|----------------------------------------------------------------------------------------------------------------------|------------------------------------|------------------------------|---------------------|-------------------------------------------------------|---------------------------------------------------------------------------------------------------------------------------|-----------------------------------------------------------------------------------------------------|
| Nishiyama O, Kondoh Y, Kimura T, <i>et al.</i> Effects of pulmonary rehabilitation in patients with idiopathic pulmonary fibrosis. <i>Respirology</i> . 2008; 13 (3):394-399. | RCT        | 1-     | 30 patients Randomised to 15 in each group. 2 dropped out from pulmonary rehabilitation group. 28 patients completed study | Patients with IPF attending outpatient clinic= aged >50 - <75 Exclusion of other causes of interstitial lung disease | Pulmonary rehabilitation - 10 week | Control 15 patients competed | 10 weeks            | Pulmonary function, blood gases, 6MWT, dyspnoea, SGRQ | Difference in change between groups for 6MWD 46.3 (8.3-84.4)m Change in total SGRQ score between groups - 6.1 (-11.7-0.5) | Grant-in-Aid for interstitial lung diseases from the Japanese Ministry of Health, Labor andWelfare. |

Comments: Randomisation made using sealed envelopes, no mention of blinding of assessor, small sample size 13 in rehab group completed, 15 in control group. No discussion of sample size a priori and small sample size likely to overestimate treatment effect. Difference in change between groups was significant at p<0.01 but confidence intervals wide and not encompassing MCID. No description of what the control group received.

Patients with only relatively mild impairments entered and short term evaluation only. Non exercise element of pulmonary rehabilitation poorly described.

| Bibliographic citation                                                                                                 | Study type | Ev lev | Number patients                                                                                                                               | Patient characteristics                                               | Intervention | Comparison       | Length of follow up | Outcome measures                                                                     | Effect size                                                                                                                       | Source of funding                                      |
|------------------------------------------------------------------------------------------------------------------------|------------|--------|-----------------------------------------------------------------------------------------------------------------------------------------------|-----------------------------------------------------------------------|--------------|------------------|---------------------|--------------------------------------------------------------------------------------|-----------------------------------------------------------------------------------------------------------------------------------|--------------------------------------------------------|
| Norweg AM, Whiteson J, Malgady R <i>et al.</i> The Effectiveness of Different Combinations of Pulmonary Rehabilitation | RCT        | 1-     | 43: Exercise training plus activity training (ETAT) = 18 Exercise training plus lecture series (ETLS) = 10 Exercise training alone (ETA) = 15 | Patients referred to an outpatient pulmonary rehabilitation programme | ETAT         | 1. ETA. 2. ETLS. | Up to 24 weeks      | Chronic Respiratory Disease Questionnaire; COPD Efficacy Scale; Pulmonary Functional | ETAT; less dyspnoea (p≤0.04) fatigue (p≤0.01) increased activity involvement (p≤0.02) & total functional status (p≤0.02) in short | New York State Occupational Therapy Association Grant. |

Program  
Components. A  
Randomised  
Controlled Trial.  
Chest. 2005; 128:  
663-672.

Status and  
Dyspnoea  
Questionnaire  
(PFSDQ).  
6MWD  
term only for  
older patients.  
ETAT; achieved  
higher gains in  
QOL (p=0.04) by  
week 24. ETLs;  
sig worse  
emotional  
function &  
functional status  
in older patients  
(p<0.03)

Comments: Confidence in findings low due to several factors suggesting a high risk of bias; Low numbers, lacked power, Authors acknowledge patients predominantly highly educated. Main author not blinded to group assignment. Significant baseline differences (age). Results not analysed as ITT.

| Bibliographic citation                                                                                                                                                                                                   | Study type                              | Ev lev | Number patients     | Patient characteristics                                                 | Intervention                                                                              | Comparison                                                                                 | Length of follow up | Outcome measures           | Effect size                                                                                                                      | Source of funding |
|--------------------------------------------------------------------------------------------------------------------------------------------------------------------------------------------------------------------------|-----------------------------------------|--------|---------------------|-------------------------------------------------------------------------|-------------------------------------------------------------------------------------------|--------------------------------------------------------------------------------------------|---------------------|----------------------------|----------------------------------------------------------------------------------------------------------------------------------|-------------------|
| O'Neill B, McKevitt AM, Bradley J, et al. A comparison of twice weekly versus once weekly supervision during pulmonary rehabilitation in Chronic Obstructive Pulmonary Disease. Arch Phys Med Rehabil. 2007; 88:167-172. | Randomised control parallel group study | 2-     | 91.<br>66 completed | COPD patients recruited from pulmonary rehabilitation outpatient clinic | Once weekly supervised pulmonary rehabilitation sessions for 6 weeks (and 2 unsupervised) | Twice weekly supervised pulmonary rehabilitation sessions for 6 weeks (and 1 unsupervised) | 6 months            | Included ISWT, ESWT, CRDQ, | Mean (95% CI) difference in changes between groups<br>ISWT<br>13.5m (-10, 37m)<br><br>ESWT 72s (-96, 241s);<br>CRDQ 2.54 (-3, 8) | Not stated        |

Comments: Randomised study comparing once weekly with twice weekly supervised sessions of pulmonary rehabilitation. No difference in outcomes and minimal improvement in both arms, any beneficial effects of pulmonary rehabilitation had diminished by 6 month follow up. Limitations of study include high dropout meant that study was not powered and as such the number of patients completing the programme may have been too low to demonstrate a difference between two groups. Not powered originally for equivalence. Blinded assessor for outcomes.

| Bibliographic citation                                                                                                                                                               | Study type        | Ev lev | Number patients                                                              | Patient characteristics                                                | Intervention      | Comparison                                                                      | Length of follow up | Outcome measures     | Effect size                                                                                                                            | Source of funding                                                                                                                                        |
|--------------------------------------------------------------------------------------------------------------------------------------------------------------------------------------|-------------------|--------|------------------------------------------------------------------------------|------------------------------------------------------------------------|-------------------|---------------------------------------------------------------------------------|---------------------|----------------------|----------------------------------------------------------------------------------------------------------------------------------------|----------------------------------------------------------------------------------------------------------------------------------------------------------|
| O'Shea F, Taylor J, Paratz D. Progressive Resistance Exercise Improves Muscle Strength and May Improve Elements of Performance of Daily Activities for People With COPD A Systematic | Systematic review | 1++    | 18 controlled trials included<br>(5 relating specifically to PICO)<br>n= 679 | Severe COPD participants mean FEV1 % predicted 45.9% and mean age 63.7 | Resisted training | Endurance and resisted training programmes compared with resisted training only | miscellaneous       | Muscle strength, ADL | Meta-analysis found large sizes for increases in leg press strength (Mw change, 16.2%; 0.96; 95% CI, 0.26 to 1.66 [p 0.006]; Q 7.74 [p | The authors have reported to the ACCP that no significant conflicts of interest exist with any companies/organizations whose products or services may be |

Review  
 Simone D. Chest  
 2009; 136(5):1269-  
 1283.

0.11])20,21,25,29, 34; whereas, small s favouring progressive resistance exercise were shown for latissimus dorsi strength (Mw change, 18.3%; 0.43; 95% CI, 0.07 to 0.8 [p 0.02]; Q 3.09 [p 0.37]).22,28,31,33 No difference in biceps strength (Mw change, 18%; 0.23; 95% CI, 0.25 to 0.71 [p 0.34]; Q 0.05 [p 0.82]) was demonstrated after progressive resistance exercise when compared with no intervention or aerobic training. Concurrent progressive resistance exercise and aerobic training compared with aerobic training alone ( 0.19; 95% CI, 0.30 to 0.69 [p 0.44]; Q 8.4 [p 0.76]). discussed in this article.

| Comments:<br>Bibliographic citation             | Study type | Ev lev | Number patients | Patient characteristics              | Intervention                    | Comparison        | Length of follow up | Outcome measures                  | Effect size                               | Source of funding           |
|-------------------------------------------------|------------|--------|-----------------|--------------------------------------|---------------------------------|-------------------|---------------------|-----------------------------------|-------------------------------------------|-----------------------------|
| O'Shea, S., Taylor N, Paratz J. A predominantly | RCT        | 1-     | 54              | COPD, No pulmonary rehabilitation in | Home based resistance programme | Versus usual care | 24 weeks            | Strength (hand held dynamometer). | Increased strength by 3.8 kg at 12 weeks. | Equipment grant: Thermaband |

home based progressive resistance exercise program increases knee extensor strength in the short term in people with chronic obstructive pulmonary disease. A randomised controlled trial. *Aus J of Physiotherapy*. 2007; 53: 229-237.

previous 12 months, unstable disease preventing resistance training

using rubber resistance bands

Knee extensor, hip abductor, Shoulder horizontal flexor, Shoulder flexor.

Not maintained by 24 weeks

Comments: Only 15 subjects in training group completed training completely (per protocol).

| Bibliographic citation                                                                                                                                                                                                | Study type | Ev lev | Number patients                           | Patient characteristics        | Intervention                                            | Comparison                                                                                              | Length of follow up | Outcome measures                 | Effect size                                                                                                                                                                                                                                          | Source of funding                                                                                                                     |
|-----------------------------------------------------------------------------------------------------------------------------------------------------------------------------------------------------------------------|------------|--------|-------------------------------------------|--------------------------------|---------------------------------------------------------|---------------------------------------------------------------------------------------------------------|---------------------|----------------------------------|------------------------------------------------------------------------------------------------------------------------------------------------------------------------------------------------------------------------------------------------------|---------------------------------------------------------------------------------------------------------------------------------------|
| Ortega F, Toral, J, Cejudo, P. <i>et al</i> . Comparison of effects of strength and endurance training in patients with chronic obstructive pulmonary disease. <i>Am J Respir Crit Care Med</i> . 2002; 166: 669-674. | RCT        | 1-     | 72 patients entered study, 7 dropped out. | COPD irreversible obstruction. | Training programme 3 alternate days a week for 12 weeks | Endurance training alone, vs. strength training alone, vs. combined endurance and strength vs. control. | 12 weeks            | SWT, FEV1, breathlessness, HRQOL | At 12 weeks post training, all exercise groups showed sig increases in endurance testing compared to baseline. Endurance group improvements were sig higher than in strength group alone. Combined group acquired most benefits of each intervention | Supported by grants from Fondo de Investigaciones Sanitarias (FIS 97/0472) and Consejería de Salud, Junta de Andalucía (96/67), Spain |

Notes: The data is based on small sample sizes which limits generalisation. Authors conclude there may be type 2 error. Post programme improvement in SWT only statistically significant in strength group which raises concern re the efficacy of the programme itself.

| Bibliographic citation | Study type | Ev lev | Number patients | Patient characteristics | Intervention | Comparison | Length of follow up | Outcome measures | Effect size | Source of funding |
|------------------------|------------|--------|-----------------|-------------------------|--------------|------------|---------------------|------------------|-------------|-------------------|
| Panton LB, Golden      | Reviewed   | 1-     | 17              | COPD, no                | Combined     | Aerobic    | 12 weeks            | Muscle strength, | Small non-  | Tennessee         |

**J, Broeder CE, et al.** in O'Shea systematic review. Controlled trial (not randomised)  
**The effects of resistance training on functional outcomes in patients with COPD.** Eur J Appl Physiol. 2004; 91:443-9.

evidence of recent acute exacerbation. No contradictory comorbidities

resistance / aerobic programme

programme only

12 MWD ADL's

significant trend towards improved walking distance but no improvement in walking distance for control group.

university grant

**Comments: No improvement in 12 minute walking test in control group. Most of the subjects had been attending the programme for at least 2 years prior to the study. High risk of bias.**

| Bibliographic citation                                                                                                                                                                                                                      | Study type | Ev lev | Number patients                             | Patient characteristics | Intervention                                                                                                                 | Comparison                                    | Length of follow up | Outcome measures                           | Effect size                                                                                                                                                                                                                                                                   | Source of funding |
|---------------------------------------------------------------------------------------------------------------------------------------------------------------------------------------------------------------------------------------------|------------|--------|---------------------------------------------|-------------------------|------------------------------------------------------------------------------------------------------------------------------|-----------------------------------------------|---------------------|--------------------------------------------|-------------------------------------------------------------------------------------------------------------------------------------------------------------------------------------------------------------------------------------------------------------------------------|-------------------|
| <b>Paz-Diaz, H. Montes de oca M, Lopez JM, Celli BR.</b> Pulmonary rehabilitation improves depression, anxiety, dyspnoea and health status in patients with COPD. American Journal of Physical Medicine & Rehabilitation, 2007; 86(1):30-6. | RCT        | 1-     | Pulmonary rehabilitation = 10, control = 14 | Severe COPD             | A 2 month pulmonary rehabilitation programme attending 3 days per week in groups of 2 -3. No mention of education programme. | Usual care - visited physician every 3 weeks. | 2 months            | Beck depression inventory, STAI, MRC, SGRQ | Beck Depression Inventory pulmonary rehabilitation = -8 control = -2; pulmonary rehabilitation change p<0.01; SGRQ pulmonary rehabilitation = -8 control = +3 PR change p<0.01; STAI trait pulmonary rehabilitation = -16 control = +2 pulmonary rehabilitation change p=0.06 | Not stated        |

**Comments:**

| Bibliographic citation                                                                                                                                              | Study type         | Ev lev | Number patients                              | Patient characteristics         | Intervention                                                           | Comparison                                | Length of follow up | Outcome measures                                                 | Effect size                                                                                                                     | Source of funding                                                                                                                                       |
|---------------------------------------------------------------------------------------------------------------------------------------------------------------------|--------------------|--------|----------------------------------------------|---------------------------------|------------------------------------------------------------------------|-------------------------------------------|---------------------|------------------------------------------------------------------|---------------------------------------------------------------------------------------------------------------------------------|---------------------------------------------------------------------------------------------------------------------------------------------------------|
| <b>Petersen MAW, Mittendorfer B, Magkos F, et al.</b> Physical activity counteracts increased whole-body protein breakdown in chronic obstructive pulmonary disease | Case-control study | 2+     | 19 (pulmonary rehabilitation= 9, Control=10) | COPD, >20 pack years, MRC III-V | 7 week pulmonary rehabilitation programme. Controls received education | Control group (though received education) | 7 weeks             | ISWT, SGRQ, systemic inflammatory markers, Leucine concentration | Improved exercise performance in terms of ISWT, though not health status or calculated VO2 max. There was a decrease in protein | Centre - Danish National Research Foundation (# 02-512-55). Study - The Danish Lung Association, the Danish Medical Research Council (# 22-01-009), the |

patients.  
 Scandinavian  
 Journal of Medicine  
 & Science in Sports.  
 2008; 18(5):557-64.

breakdown  
 following  
 training.  
 Commission of the  
 European  
 Communities, the  
 US  
 National Institutes  
 of Health grants  
 AR 49869, DK  
 56341,  
 grants from the  
 University of  
 Copenhagen, the  
 Copenhagen  
 Hospital  
 Corporation, the  
 Pharmacist  
 Foundation of  
 1991,  
 the Legacy of Ebba  
 Celinder, and the  
 Foundation of  
 Managing  
 Director Jacob  
 Madsen & Spouse  
 Olga Madsen

| Comments:<br>Bibliographic<br>citation                                                                                                                                                                                           | Study<br>type                                             | Ev lev | Number patients | Patient<br>characteristics        | Intervention                                          | Comparison                       | Length of<br>follow up | Outcome<br>measures   | Effect size                                                       | Source of funding |
|----------------------------------------------------------------------------------------------------------------------------------------------------------------------------------------------------------------------------------|-----------------------------------------------------------|--------|-----------------|-----------------------------------|-------------------------------------------------------|----------------------------------|------------------------|-----------------------|-------------------------------------------------------------------|-------------------|
| Phillips WT, Benton MJ, Wagner CL, Riley C. The effect of single set resistance training on strength and functional fitness in pulmonary rehabilitation patients. Journal of Cardiopulmonary Rehabilitation. 2006; 26:5 330-337. | Randomised trial.<br>Reviewed in O'Shea systematic review | 1-     | 20              | Pulmonary rehabilitation patients | Endurance programme combined with resistance training | Endurance based 8 week programme | 8 weeks                | Function              | Significant improvement in muscle strength and functional ability |                   |
| Comments<br>Bibliographic<br>citation                                                                                                                                                                                            | Study<br>type                                             | Ev lev | Number patients | Patient<br>characteristics        | Intervention                                          | Comparison                       | Length of<br>follow up | Outcome<br>measures   | Effect size                                                       | Source of funding |
| Puente-Maestu L, Sáenz ML, Sáenz P, et                                                                                                                                                                                           | RCT                                                       | 1-     | 49 patients     | Moderate to severe (stable)       | Exercise                                              | Hospital (treadmill)vs.          | 8 weeks                | CRDQ, incremental and | Both groups improved.                                             | Not stated        |

*al.* Comparison of effects of supervised versus self-monitored training programmes in patients with chronic obstructive pulmonary disease. Eur Respir J. 2000 Mar;15(3):517-25.

COPD

home (pedometer based)

endurance cycle test.

CRDQ not different between groups

Comments: No power calculation, probably underpowered, outcome assessment not blinded, explored physiological response in detail.

| Bibliographic citation                                                                                                                                                                                                               | Study type      | Ev lev | Number patients                                                                                                | Patient characteristics                                                                  | Intervention                                                                                                                                                                                                                  | Comparison                                                     | Length of follow up                                                                                          | Outcome measures                                                                                                                                          | Effect size                                                                                                                                                                                                                                                                                                                                                             | Source of funding                                       |
|--------------------------------------------------------------------------------------------------------------------------------------------------------------------------------------------------------------------------------------|-----------------|--------|----------------------------------------------------------------------------------------------------------------|------------------------------------------------------------------------------------------|-------------------------------------------------------------------------------------------------------------------------------------------------------------------------------------------------------------------------------|----------------------------------------------------------------|--------------------------------------------------------------------------------------------------------------|-----------------------------------------------------------------------------------------------------------------------------------------------------------|-------------------------------------------------------------------------------------------------------------------------------------------------------------------------------------------------------------------------------------------------------------------------------------------------------------------------------------------------------------------------|---------------------------------------------------------|
| Puhan MA , Gimeno-Santos E, Scharplatz M, <i>et al.</i> Pulmonary rehabilitation following exacerbations of chronic obstructive pulmonary disease. Cochrane Database of Systematic Reviews. 2011; DOI: 10.1002/14651858.005305.pub3. | Cochrane Review | 1++    | Nine trials involving 432 patients (Hospital readmission 250, mortality 110, HRQOL 259 , exercise capacity 428 | >90% of the patients had COPD Post- in or out patient care following acute exacerbation. | Any in-patient or out-patient pulmonary rehabilitation programme, including at least physical exercise. Programmes commenced either immediately after initiation of acute exacerbation treatment or up to 3 weeks afterwards. | Conventional community care following acute exacerbation COPD. | Admission to hospital: ranged 3 to 18 months, mean 25 weeks. Mortality range 3 to 48 months, mean 107 weeks. | Hospital admissions HRQOL acute exacerbation rates Outpatient visits Length of readmissions Mortality Exercise capacity Withdrawals Adverse effects Costs | Early pulmonary rehabilitation sig reduced hospital admissions (pooled odds ratio 0.22 [95% CI 0.08 to 0.58] with a number needed to treat (NNT) of 4 [95% CI 3 to 8], over 25 weeks. Pulmonary rehabilitation reduced mortality (OR 0.28; 95% CI 0.10 to 0.84), NNT 6 [95% CI 5 to 30] over 107 weeks). Sig difference in HRQOL, 6MWD and SWT favours pulmonary rehab. | 1 salary funded by Helmut Horten foundation Switzerland |

Comments: Authors state that effect size may be overestimated as study samples small, however with such large effect size, unlikely that can be attributed to bias only. Patients may be more willing to change behaviour

after acute exacerbation. Possibility of interruption to pulmonary rehabilitation if patients re-exacerbate. Authors suggest methodologically sound and large studies. Also analyses of cost effectiveness.

| Bibliographic citation                                                                                                                                                                                      | Study type | Ev lev | Number patients                  | Patient characteristics                                                                                                                                        | Intervention                                    | Comparison                                                   | Length of follow up | Outcome measures                                             | Effect size                                              | Source of funding                                                                                                                                                                                                                                                     |
|-------------------------------------------------------------------------------------------------------------------------------------------------------------------------------------------------------------|------------|--------|----------------------------------|----------------------------------------------------------------------------------------------------------------------------------------------------------------|-------------------------------------------------|--------------------------------------------------------------|---------------------|--------------------------------------------------------------|----------------------------------------------------------|-----------------------------------------------------------------------------------------------------------------------------------------------------------------------------------------------------------------------------------------------------------------------|
| Puhan MA, Spaar A, Frey M, et al. Early versus Late Pulmonary Rehabilitation in Chronic Obstructive Pulmonary Disease Patients with Acute Exacerbations: A Randomized Trial. Respiration. 2012; 83:499-506. | RCT        | 1-     | 36 (19 intervention; 17 control) | COPD patients treated for exacerbation; GOLD II-IV; Age 40+; at least 2 exacerbations in the last 2 years; INPATIENT or OUTPATIENT care for acute exacerbation | "Early Pulmonary rehabilitation" within 2 weeks | "Late pulmonary rehabilitation" 6 months after randomisation | 18 months           | Exacerbation rate, health related quality of life, mortality | No statistically significant differences between groups. | The Swiss Lung League, the Lung Leagues of the cantons of Aargau, Grisons, Lucerne, Nidwalden, Solothurn, Thurgau, Valais, Vaud and Zurich, the Klinik Barmelweid, the 4 clinics of Crans-Montana (Quadrimed), the Höhenkliniken of Zurich, Astra Zeneca Switzerland. |

Comments: Underpowered due to problems with recruitment; high numbers of dropout and deviations from planned programme; mixture of in-patient and outpatient pulmonary rehabilitation; not all patients had hospitalised exacerbations.

| Bibliographic citation                                                                                                                                                          | Study type | Ev lev | Number patients            | Patient characteristics                                                                                                                          | Intervention                                                                                                          | Comparison    | Length of follow up                      | Outcome measures                                                                       | Effect size                                                                                                                                                                                                | Source of funding      |
|---------------------------------------------------------------------------------------------------------------------------------------------------------------------------------|------------|--------|----------------------------|--------------------------------------------------------------------------------------------------------------------------------------------------|-----------------------------------------------------------------------------------------------------------------------|---------------|------------------------------------------|----------------------------------------------------------------------------------------|------------------------------------------------------------------------------------------------------------------------------------------------------------------------------------------------------------|------------------------|
| Reuveny R, Ben-Dov I, Gaides M, Reichert N. Ventilatory support during training improves training benefit in severe COPD. Israeli Medical Association Journal. 2005; 7:151-155. | RCT        | 1-     | 9 intervention 10 controls | COPD severe FEV1 32% pred. Only 2 women. Baseline ABG not given but ETCO2 post exercise was low normal so very unlikely to have type II failure. | BiPAP during training using a treadmill 45 minutes twice a week, to maintain constant workload, for 2 months in total | No assistance | 1 week before and at the end of training | VO2 max training speed anaerobic threshold exercise lactate level exercise ventilation | Intervention group had improvements compared to the control group training speed increased by 94% vs. 41% p<0.005, increased in VO2 max 23% compared to baseline p<0.005 whilst no change in peak lactate. | Israel Lung Foundation |



End tidal CO2 was lower 38 mmHg vs. 40 in the controls p<0.05.

**Comments:**

| Bibliographic citation                                                                                                                                                                                                           | Study type         | Ev lev | Number patients             | Patient characteristics                               | Intervention                              | Comparison    | Length of follow up | Outcome measures | Effect size                                                    | Source of funding |
|----------------------------------------------------------------------------------------------------------------------------------------------------------------------------------------------------------------------------------|--------------------|--------|-----------------------------|-------------------------------------------------------|-------------------------------------------|---------------|---------------------|------------------|----------------------------------------------------------------|-------------------|
| Riario-Sforza G.G, Incorvaia C, Paterniti F, <i>et al.</i> Effects of pulmonary rehabilitation on exercise capacity in patients with COPD: a number needed to treat study. Intern J of Chronic Obstruct Pul Dis. 2009; 4: 315-9. | Case-control study | 2-     | 284 (Rehab=222, Control=62) | COPD, attending a pulmonary rehabilitation programme. | 6 week pulmonary rehabilitation programme | Control group | 6 weeks             | 6MWT             | NNT=2 for GOLD II-IV, NNT=8 for GOLD I (per protocol analysis) | Not stated        |

**Comments:**

| Bibliographic citation                                                                                                                                                                                                           | Study type | Ev lev | Number patients                                               | Patient characteristics                                                                                                                                                                                            | Intervention                                                                                                                                                                                         | Comparison                                                 | Length of follow up | Outcome measures                                                                                                                                                   | Effect size                                                                                                                                                                                     | Source of funding |
|----------------------------------------------------------------------------------------------------------------------------------------------------------------------------------------------------------------------------------|------------|--------|---------------------------------------------------------------|--------------------------------------------------------------------------------------------------------------------------------------------------------------------------------------------------------------------|------------------------------------------------------------------------------------------------------------------------------------------------------------------------------------------------------|------------------------------------------------------------|---------------------|--------------------------------------------------------------------------------------------------------------------------------------------------------------------|-------------------------------------------------------------------------------------------------------------------------------------------------------------------------------------------------|-------------------|
| Ries AL, Kaplan RM, Limberg TM, Prewitt LM. Effects of pulmonary rehabilitation on physiologic and psychosocial outcomes in patients with chronic obstructive pulmonary disease. Annals of Internal Medicine. 1995; 122:823-833. | RCT        | 2+     | 119 patients in total randomised 57 to the intervention group | Mild to severe COPD 32 women no other serious medical conditions at time of enrolment ex-smokers or smokers committed to quitting age 61.5 vs. 63.6 (control) mean FEV1 1.2 litres no % predicted given ratio 42%. | 8 weeks pulmonary rehabilitation programme 12 x 4 hour sessions including education exercise psychosocial support and specific respiratory care education followed by monthly refresher for one year | 8 weeks education only programme 4 x 2 hour video sessions | 6 years             | Survival pulmonary function tests; maximal exercise tolerance, self-efficacy; Quality of well-being; CES-D; university of California SOB Q Health Care utilisation | Survival: 67% rehab vs. 56% control p=0.32 Rehab produced significantly greater improvements in exercise endurance; maximum exercise tolerance; symptoms of perceived breathlessness and muscle | NHLBI             |

| Comments:                                                                                                                                                                            |            |        |                                                                                                                                      |                         |                                                                                                                           |                                                                                                                     |                                     |                                                                                 |                                                                                                                                                                                                                                                                                                                                                                                                                                                                                                                                             |                   |
|--------------------------------------------------------------------------------------------------------------------------------------------------------------------------------------|------------|--------|--------------------------------------------------------------------------------------------------------------------------------------|-------------------------|---------------------------------------------------------------------------------------------------------------------------|---------------------------------------------------------------------------------------------------------------------|-------------------------------------|---------------------------------------------------------------------------------|---------------------------------------------------------------------------------------------------------------------------------------------------------------------------------------------------------------------------------------------------------------------------------------------------------------------------------------------------------------------------------------------------------------------------------------------------------------------------------------------------------------------------------------------|-------------------|
| Bibliographic citation                                                                                                                                                               | Study type | Ev lev | Number patients                                                                                                                      | Patient characteristics | Intervention                                                                                                              | Comparison                                                                                                          | Length of follow up                 | Outcome measures                                                                | Effect size                                                                                                                                                                                                                                                                                                                                                                                                                                                                                                                                 | Source of funding |
| Ries RM, Kaplan R, Myers R, Prewitt LM. Maintenance after pulmonary rehabilitation in chronic lung disease: a Randomized trial. Am J Respir Crit Care Med. 2003; 15; 167(6):880-888. | RCT        | 1+     | 172 were randomised to experimental group (87) or control (85)<br>148 completed 12 month follow up, 131 completed 24 month follow up | Chronic lung disease    | Maintenance intervention consisting of weekly telephone calls and monthly supervised reinforcement sessions for 12 months | Standard care control group referral back to usual healthcare provider. Invited to regular monthly alumni meetings. | 6, 12 and 24 months following rehab | Pulmonary function<br>Exercise tolerance<br>Dyspnoea<br>HRQOL<br>Healthcare use | fatigue; reported SOB with activities and self-efficacy for walking (latter - rehab improved 1.4 (3.1); control 0.1 (2.9), p≤0.05<br><br>Modest effect in experimental group. During intervention year, sig better maintained exercise tolerance, health status and hospital days in experimental group. After 24 months, both groups had returned to levels of ET and HRQOL slightly above pre-rehabilitation levels. In 2 <sup>nd</sup> year healthcare utilization significantly lower in experimental group. No difference in survival. | Not stated        |

Comments: Authors concluded that a maintenance programme of phone calls plus monthly contact had modest effect on health benefits but did not prevent regression of benefits after intervention. It may be the intervention that was not effective enough. Health care utilization dropped.

| Bibliographic citation                                                                                                                                                                                                                                                                      | Study type | Ev lev | Number patients                                         | Patient characteristics                                                                                                                                                      | Intervention                                                                                                                                                      | Comparison                                           | Length of follow up   | Outcome measures                                                                                                                           | Effect size                                                                                                                                       | Source of funding |
|---------------------------------------------------------------------------------------------------------------------------------------------------------------------------------------------------------------------------------------------------------------------------------------------|------------|--------|---------------------------------------------------------|------------------------------------------------------------------------------------------------------------------------------------------------------------------------------|-------------------------------------------------------------------------------------------------------------------------------------------------------------------|------------------------------------------------------|-----------------------|--------------------------------------------------------------------------------------------------------------------------------------------|---------------------------------------------------------------------------------------------------------------------------------------------------|-------------------|
| Ringbaek T, Brøndum E, Martínez G <i>et al.</i> Long-term effects of 1-year maintenance training on physical functioning and health status in patients with chronic obstructive pulmonary disease: A randomized controlled study. <i>J Cardiopulm Rehab and Prevention</i> 2010; 30: 47-52. | RCT        | 1-     | 96 patients in total – intervention n=55, control n=41. | Stable COPD<br>FEV1<80% predicted, ration <70% predicted. Motivated. Completion of 7 week pulmonary rehabilitation programme.<br><br>Exclusions – significant co morbidities | Instructed to continue unsupervised training at home plus weekly supervised training sessions 1 <sup>st</sup> 6 months, fortnightly for 2 <sup>nd</sup> 6 months. | Instructed to continue unsupervised training at home | 3,6,12, and 18 months | Primary outcome – ESWT and SGRQ. Secondary outcomes – hospitalization, admission rates, length of stay, adherence to training, attendance. | Authors report sig improved walking time, but no report of effect size. No sig differences in SGRQ at any time. No difference in hospitalization. | Not stated        |

Comments: The results appear unclear. Unclear how many patients completed the study. High percentage of drop out – authors state comparable but higher in control group which may affect results. Decline in SGRQ in both groups after 6 months. No difference between groups to first hospitalization. Improved ESWT which disappeared when intervention stopped.

| Bibliographic citation                                                                                                                                             | Study type | Ev lev | Number patients             | Patient characteristics                                                                                                        | Intervention                                                   | Comparison                                               | Length of follow up | Outcome measures                                                                                                            | Effect size                                                                                              | Source of funding |
|--------------------------------------------------------------------------------------------------------------------------------------------------------------------|------------|--------|-----------------------------|--------------------------------------------------------------------------------------------------------------------------------|----------------------------------------------------------------|----------------------------------------------------------|---------------------|-----------------------------------------------------------------------------------------------------------------------------|----------------------------------------------------------------------------------------------------------|-------------------|
| Romagnoli M, Dell'Orso D, Lorenzi C, <i>et al.</i> Repeated pulmonary rehabilitation in severe and disabled COPD patients. <i>Respiration</i> . 2006;73(6):769-76. | RCT        | 1-     | 35 randomised, 29 completed | COPD by GOLD standard; FEV1<50% predicted; MRC at least 3; all completed an initial 18 week pulmonary rehabilitation programme | Further pulmonary rehabilitation programmes at 6 and 12 months | Further pulmonary rehabilitation programmes at 12 months | 12 months in total  | Full lung function including MIP; ABG; 6MWD; Dyspnoea and fatigue at peak effort (modified Borg); SGRQ; hospital admissions | The additional rehab session reduced SGRQ symptom sub-score but did not affect the other outcomes tested | Not stated        |

Comments: Randomisation and blinding not well described. Per-protocol analyses only. Large number of analyses (multiple end-points, time points, and comparisons) using parametric statistics for data that is bounded and not normally distributed.

| Bibliographic citation                                                       | Study type | Ev lev | Number patients | Patient characteristics                    | Intervention                                                             | Comparison                                     | Length of follow up             | Outcome measures                                                                | Effect size                                  | Source of funding                               |
|------------------------------------------------------------------------------|------------|--------|-----------------|--------------------------------------------|--------------------------------------------------------------------------|------------------------------------------------|---------------------------------|---------------------------------------------------------------------------------|----------------------------------------------|-------------------------------------------------|
| Rooyackers JM, Dekhuijzen PN, Van Herwaarden CL, Folgering HT. Training with | RCT        | 1-     | 24 randomised.  | COPD by ATS criteria. Hypoxic on exercise. | 10 weeks pulmonary rehabilitation with 4l /min oxygen via nasal cannulae | 10 weeks pulmonary rehabilitation (no placebo) | End of pulmonary rehabilitation | CPEX (incremental and constant); Lung volumes and transfer factor; 6MWD; stair- | No additional benefit of supplemental oxygen | Charity: Netherlands Asthma Foundation (90.22). |

supplemental oxygen in patients with COPD and hypoxaemia at peak exercise. *European Resp Journal*. 1997; 10(6):1278-84.

climbing; peripheral muscle endurance; CRDQ

Comments: Not blinded; randomisation process not described; no placebo gas; study underpowered for clinically meaningful gains; analysis of bounded data as if normally distributed

| Bibliographic citation                                                                                                                                                           | Study type  | Ev lev | Number patients | Patient characteristics                                         | Intervention | Comparison                                                                                                      | Length of follow up | Outcome measures | Effect size                                                                                                                                                                                                                                                               | Source of funding       |
|----------------------------------------------------------------------------------------------------------------------------------------------------------------------------------|-------------|--------|-----------------|-----------------------------------------------------------------|--------------|-----------------------------------------------------------------------------------------------------------------|---------------------|------------------|---------------------------------------------------------------------------------------------------------------------------------------------------------------------------------------------------------------------------------------------------------------------------|-------------------------|
| Sabit R, Griffiths TL, Watkins AJ, <i>et al</i> . Predictors of poor attendance at an outpatient pulmonary rehabilitation programme. <i>Respir Med</i> . 2008; 102 (6): 819-824. | Qualitative | 3      | 239             | 159 male, 80 female patients with COPD (FEV1 40(15)% predicted) | All subjects | Subjects completed either 6 or 18 week outpatient pulmonary rehabilitation. Sessions x 3/week for up to 2 hours | NA                  | Attendance rate  | A higher attendance rate was seen in non-smokers. 17.7% smokers attended at least 2 out of 3 pulmonary rehabilitation sessions while 56.5% attended fewer than 2 out of 3 sessions (p<0.01). Using multiple regression analysis smoking status contributed to attendance. | Welsh office R&D (WORD) |

Comments: Current smoking contributes to lower attendance at pulmonary rehabilitation sessions

| Bibliographic citation                                                                                                                                                                  | Study type | Ev lev | Number patients | Patient characteristics                                            | Intervention                                                                                           | Comparison                                              | Length of follow up | Outcome measures                                                      | Effect size           | Source of funding |
|-----------------------------------------------------------------------------------------------------------------------------------------------------------------------------------------|------------|--------|-----------------|--------------------------------------------------------------------|--------------------------------------------------------------------------------------------------------|---------------------------------------------------------|---------------------|-----------------------------------------------------------------------|-----------------------|-------------------|
| Scorsone D, Bartolini S, Saporiti R, <i>et al</i> . Does a low-density gas mixture or oxygen supplementation improve exercise training in COPD? <i>CHEST</i> . 2010 Nov; 138(5):1133-9. | RCT        | 1-     | 30              | History of COPD with airflow obstruction (not otherwise clarified) | Thrice weekly for 8 weeks supervised exercise programme plus 40% supplemental oxygen or heliox (60/40) | Thrice weekly for 8 weeks supervised exercise programme | End of programme    | CPEX (incremental and constant load); lung volumes & transfer factor. | No additional benefit | Government        |

Comments: The study appears to be at low risk of bias as described. However, the small size of the trial (10 patients per arm) is insufficient to exclude a clinically meaningful benefit from the active interventions studied given the inter-individual variation.

| Bibliographic citation                                                                                                                                                                                                  | Study type | Ev lev | Number patients                                                  | Patient characteristics | Intervention                                                                                    | Comparison | Length of follow up                                                             | Outcome measures      | Effect size                                       | Source of funding                                              |
|-------------------------------------------------------------------------------------------------------------------------------------------------------------------------------------------------------------------------|------------|--------|------------------------------------------------------------------|-------------------------|-------------------------------------------------------------------------------------------------|------------|---------------------------------------------------------------------------------|-----------------------|---------------------------------------------------|----------------------------------------------------------------|
| Sewell L, Singh SJ, Williams JEA, <i>et al.</i> (2006) How long should outpatient pulmonary rehabilitation be? A randomised controlled trial of 4 weeks versus 7 weeks. <i>Thorax</i> . 2006; 61: 767-771.<br>Comments: | RCT        | 1+     | 100 (control 4 weeks = 50, pulmonary rehabilitation 7 weeks= 50) | COPD                    | Pulmonary rehabilitation duration 4 weeks supervised +3 weeks unsupervised v 7 weeks supervised |            | Outcomes measured at 0, 4 (in 4 week group only), 7 weeks and finally 6 months. | ISWT, ESWT, CRDQ, BPQ | ESWT diff between groups =124.6 seconds (p=0.024) | Funded by a Trevor Clay grant from the British Lung Foundation |

| Bibliographic citation                                                                                                                                                               | Study type | Ev lev | Number patients | Patient characteristics                                                   | Intervention                                    | Comparison                                   | Length of follow up                                                                          | Outcome measures                                                                                                                | Effect size                                                                                                                                                 | Source of funding              |
|--------------------------------------------------------------------------------------------------------------------------------------------------------------------------------------|------------|--------|-----------------|---------------------------------------------------------------------------|-------------------------------------------------|----------------------------------------------|----------------------------------------------------------------------------------------------|---------------------------------------------------------------------------------------------------------------------------------|-------------------------------------------------------------------------------------------------------------------------------------------------------------|--------------------------------|
| Sewell L; Singh S; Williams JEA, <i>et al.</i> Can individualised rehabilitation improve functional independence in elderly patients with COPD? <i>CHEST</i> . 2005. 128. 1194-1200. | RCT        | 1-     | 180             | Patients with COPD referred to pulmonary rehabilitation assessment clinic | ITEP – Individually targeted exercise programme | GEP- conventional general exercise programme | Baseline, 7 weeks pulmonary rehabilitation then after pulmonary rehabilitation intervention. | Physical activity monitors; Canadian Occupational Performance Measure; ISWT; Chronic Respiratory questionnaire - self reported. | Both ITEP & GEP made significant improvements within group in all outcomes however no significant 'Between group' differences were observed in any outcome. | Trent Regional Research Scheme |

Comments: Pragmatic study however lost power in GEP arm due to higher than expected drop outs. Results not ITT.

| Bibliographic citation                                                                                                                                                                                                                                             | Study type | Ev lev | Number patients   | Patient characteristics                 | Intervention                                                                                          | Comparison | Length of follow up | Outcome measures | Effect size                          | Source of funding                  |
|--------------------------------------------------------------------------------------------------------------------------------------------------------------------------------------------------------------------------------------------------------------------|------------|--------|-------------------|-----------------------------------------|-------------------------------------------------------------------------------------------------------|------------|---------------------|------------------|--------------------------------------|------------------------------------|
| Simpson K, Killian K, McCartney N, <i>et al.</i> Randomised controlled trial of weightlifting exercise in patients with chronic airflow limitation. <i>Thorax</i> . 1992; 47:70-75.<br>Comments: Difference in baseline gender (corrected with % predicted values) | RCT        | 1-     | 34 (28 completed) | COPD. 73 years old. FEV1 39% predicted. | 10 repetitions resistance training, progressing from 50% to 85% max. Maximum redone every 6 sessions. | Control    | 8 weeks             | Strength         | 61N increase in quads strength (25%) | Medical Research Council of Canada |

| Bibliographic citation                                                                                                                                                                                | Study type   | Ev lev | Number patients                            | Patient characteristics                                    | Intervention                                          | Comparison                                                             | Length of follow up                                                                                                                                                                | Outcome measures                | Effect size                                                                                                                                                                                                    | Source of funding |
|-------------------------------------------------------------------------------------------------------------------------------------------------------------------------------------------------------|--------------|--------|--------------------------------------------|------------------------------------------------------------|-------------------------------------------------------|------------------------------------------------------------------------|------------------------------------------------------------------------------------------------------------------------------------------------------------------------------------|---------------------------------|----------------------------------------------------------------------------------------------------------------------------------------------------------------------------------------------------------------|-------------------|
| Skumlien, S, Skogedal EA, Bjørtuft φ, <i>et al.</i> Four weeks' intensive rehabilitation generates significant health effects in COPD patients. <i>Chronic Respiratory Disease.</i> 2007; 4(1): 5-13. | Cohort study | 2+     | Pulmonary rehabilitation= 40, control = 20 | COPD patients living within 6 hours of travel from clinic. | 4 week in patient pulmonary rehabilitation programme. | Usual care - control patients on pulmonary rehabilitation waiting list | Pulmonary rehabilitation subjects – 4 weeks<br>Control subjects – assessed 4 months prior to start of pulmonary rehabilitation then at start of pulmonary rehabilitation programme | Work rate peak, SGRQ, 6MWD, TET | Work rate peak, watts pulmonary rehabilitation +26<br>Control +7 p <0.05; 6MWD pulmonary rehabilitation +14 (n=33)<br>Control +-5 NS; SGRQ (total scores) pulmonary rehabilitation - 66 (n=33)<br>Control -0.5 | Not stated        |

**Comments:**

| Bibliographic citation                                                                                                                                                                                                                                     | Study type       | Ev lev | Number patients       | Patient characteristics                                                                           | Intervention                                                                     | Comparison    | Length of follow up | Outcome measures                              | Effect size                                                                                                                                       | Source of funding         |
|------------------------------------------------------------------------------------------------------------------------------------------------------------------------------------------------------------------------------------------------------------|------------------|--------|-----------------------|---------------------------------------------------------------------------------------------------|----------------------------------------------------------------------------------|---------------|---------------------|-----------------------------------------------|---------------------------------------------------------------------------------------------------------------------------------------------------|---------------------------|
| Stav D, Raz M, Shpirer I. Three years of pulmonary rehabilitation: inhibit the decline in airflow obstruction, improves exercise endurance time, and body-mass index, in chronic obstructive pulmonary disease. <i>BMC Pulmonary Medicine.</i> 2009; 9:26. | Controlled trial | 2+     | 80 (40 in each group) | COPD, On LABA or ICS/LABA, <70 years, FEV1 30-60% predicted, stable 2 months prior to recruitment | 3 years, twice weekly supervised exercise + unsupervised, psychologist as needed | Control group | 3 years             | Cycle incremental, cycle endurance, FEV1, BMI | 75ml difference in FEV1 in 3 years.<br>Improved and sustained exercise performance. BMI remained stable in rehab group (reduced in control group) | Tel Aviv Lung Association |

**Comments:** Long period of rehab. Small clinical difference in FEV1

| Bibliographic citation                 | Study type | Ev lev | Number patients   | Patient characteristics       | Intervention             | Comparison    | Length of follow up | Outcome measures            | Effect size               | Source of funding              |
|----------------------------------------|------------|--------|-------------------|-------------------------------|--------------------------|---------------|---------------------|-----------------------------|---------------------------|--------------------------------|
| Steiner MC, Barton R, Singh SJ, Morgan | RCT        | 1+     | 85 (60 completed) | At least moderate COPD by BTS | 125 ml supplement drink: | Non-nutritive | 8 weeks             | ISWT, ESWT, handgrip, quads | No difference in exercise | University Hospitals Leicester |

**MDL. Nutritional enhancement of exercise performance in chronic obstructive pulmonary disease: a randomised Controlled trial. Thorax. 2003; 58:745–751.**

criteria excluded if BMI >30 or diabetic

570 kcal daily in the following macronutrient composition: carbohydrate 60%, fat 20%, protein 20%.

Both had pulmonary rehabilitation.

visually identical placebo  
  
Pulmonary rehabilitation.

strength, weight, FFM,

capacity, supplement group gained weight (0.63kg). Control group lost weight (0.58Kg), p=0.004

and Nutricia, Zoetermeer, The Netherlands.

**Comments: Only 60 patients completed the study so the findings should not be interpreted as definitive**

| Bibliographic citation                                                                                                                                                                                                                                            | Study type | Ev lev | Number patients                                  | Patient characteristics          | Intervention           | Comparison                    | Length of follow up | Outcome measures                                                                   | Effect size                                                                                                                        | Source of funding |
|-------------------------------------------------------------------------------------------------------------------------------------------------------------------------------------------------------------------------------------------------------------------|------------|--------|--------------------------------------------------|----------------------------------|------------------------|-------------------------------|---------------------|------------------------------------------------------------------------------------|------------------------------------------------------------------------------------------------------------------------------------|-------------------|
| <b>Srijbos JH, Postma D, van Altna R, et al. A comparison between an outpatient hospital-based pulmonary rehabilitation program and a home-care pulmonary rehabilitation program in patients with COPD. A follow-up of 18 months. CHEST. 1996; 109(2):366-72.</b> | RCT        | 1-     | 50 patients 18 hospital, 17 home care 15 control | Moderate to severe (stable) COPD | Exercise and education | Hospital vs. home vs. control | 18 months           | Spirometry, cycle test, Borg, 4 min walk distance (primary outcome not identified) | Both intervention groups improved in exercise test (w max) at 3 months. Home group maintained benefit at 12 and 18 months (p<0.05) | Not stated        |

**Comments: Small study-underpowered, outcome assessment not blinded.**

| Bibliographic citation                                                                                                                                                                                                    | Study type | Ev lev | Number patients | Patient characteristics                                          | Intervention                                                                                                                                            | Comparison                    | Length of follow up       | Outcome measures                                                                                                 | Effect size                                                                                                                                      | Source of funding |
|---------------------------------------------------------------------------------------------------------------------------------------------------------------------------------------------------------------------------|------------|--------|-----------------|------------------------------------------------------------------|---------------------------------------------------------------------------------------------------------------------------------------------------------|-------------------------------|---------------------------|------------------------------------------------------------------------------------------------------------------|--------------------------------------------------------------------------------------------------------------------------------------------------|-------------------|
| <b>Toledo A, Borghi-Silva A, Malosá Sampaio LM, et al. The impact of non-invasive ventilation during the physical training in patients with moderate-to-severe chronic obstructive pulmonary disease (COPD). Clinics.</b> | RCT        | 1-     | 18              | COPD patients; FEV<60% predicted; clinically stable for 6 months | Bi-level ventilation (IPAP 10-15cmH2O; EPAP 4-6cmH2O). Training programme: 12 weeks, 30 minutes three times a week, treadmill walking 70% maximum speed | Unassisted training programme | Before and after training | Incremental treadmill walk, blood lactate, respiratory muscle strength, isotime Borg, isotime oxygen saturations | Both groups showed improvements in walk distance, respiratory muscle strength and peripheral oxygen saturation, and a reduction in Borg dyspnoea | Not stated        |

2007;62(2):113-20.

scores. Blood lactate significantly decreased and VO2 significantly increased in NIV group. Only change in blood lactate stated to be significantly different between groups.

**Comments: No information about randomisation process. Patients and investigators not blinded. Underpowered/small numbers. Statistical testing for difference between groups not mentioned for all outcomes.**

| Bibliographic citation                                                                                                                                                                                                                      | Study type | Ev lev | Number patients | Patient characteristics                    | Intervention | Comparison                                                       | Length of follow up | Outcome measures                                                                                                                                          | Effect size                                                                                                                                                                                           | Source of funding |
|---------------------------------------------------------------------------------------------------------------------------------------------------------------------------------------------------------------------------------------------|------------|--------|-----------------|--------------------------------------------|--------------|------------------------------------------------------------------|---------------------|-----------------------------------------------------------------------------------------------------------------------------------------------------------|-------------------------------------------------------------------------------------------------------------------------------------------------------------------------------------------------------|-------------------|
| Trappenburg JC, Troosters T, Spruit MA, <i>et al.</i><br>Psychosocial conditions do not affect short-term outcome of multidisciplinary rehabilitation in chronic obstructive pulmonary disease.<br>Arch Phys Med Rehabil 2005 86(9):1788-92 | Cohort     | 3      | 81              | Patients with COPD (FEV1 40(15)% predicted | All subjects | 12 week outpatient rehabilitation with 2 hour sessions, 3 / week | NA                  | Change in psychological metrics (HAD, PAIS-SR), social support / interactions (SSL-N), QAL (CRDQ, HRQOL) functional capacity (6MWT, Max aerobic capacity) | Significant improvements in functional exercise capacity, HRQOL, functional status, depression and anxiety observed. Baseline psychological measures did not relate to change in functional capacity. | University Grant  |

**Comments: Outcome from this prolonged pulmonary rehabilitation programme was independent of baseline psychological and socioeconomic status. Study limitations include study selection bias.**

| Bibliographic citation | Study type | Ev level | Number patients | Patient characteristics | Intervention | Comparison | Length of Follow-up | Outcome measures | Effect Size | Source of Funding |
|------------------------|------------|----------|-----------------|-------------------------|--------------|------------|---------------------|------------------|-------------|-------------------|
|------------------------|------------|----------|-----------------|-------------------------|--------------|------------|---------------------|------------------|-------------|-------------------|



|                                                                                                                                                                                            |     |    |                           |                                                       |                                                                            |                |                  |                                                                                                                      |                                                                |                                                                    |
|--------------------------------------------------------------------------------------------------------------------------------------------------------------------------------------------|-----|----|---------------------------|-------------------------------------------------------|----------------------------------------------------------------------------|----------------|------------------|----------------------------------------------------------------------------------------------------------------------|----------------------------------------------------------------|--------------------------------------------------------------------|
| <b>Troosters T, Gosselink R, Decramer M. Short and long term effects of outpatient rehabilitation in patients with chronic obstructive pulmonary disease. Am J Med. 2000; 109:207-212.</b> | RCT | 1- | 100 enrolled, 62 analysed | COPD, FEV1 <65% predicted, <75 years, clinical stable | Exercise training, concurrent aerobic and resistance training for 6 months | <b>Control</b> | <b>18 months</b> | Isometric strength, maximal exercise performance, quality of life, health economic, functional 51entilat performance | 18Nm increase in quads strength at 6 months, 15Nm at 18 months | Fonds voor Wetenschappelijk Onderzoek-Vlaanderen, Levenslijn grant |
|--------------------------------------------------------------------------------------------------------------------------------------------------------------------------------------------|-----|----|---------------------------|-------------------------------------------------------|----------------------------------------------------------------------------|----------------|------------------|----------------------------------------------------------------------------------------------------------------------|----------------------------------------------------------------|--------------------------------------------------------------------|

Comments: Per protocol analysis (only 62% included)

| Bibliographic citation                                                                                                                                                            | Study type | Ev lev | Number patients             | Patient characteristics                                                                                       | Intervention                                                                                                       | Comparison                                                                                                     | Length of follow up   | Outcome measures                                        | Effect size                                                                                                                                                                                                                                                                 | Source of funding       |
|-----------------------------------------------------------------------------------------------------------------------------------------------------------------------------------|------------|--------|-----------------------------|---------------------------------------------------------------------------------------------------------------|--------------------------------------------------------------------------------------------------------------------|----------------------------------------------------------------------------------------------------------------|-----------------------|---------------------------------------------------------|-----------------------------------------------------------------------------------------------------------------------------------------------------------------------------------------------------------------------------------------------------------------------------|-------------------------|
| <b>van 't Hul A, Gosselink R, Hollander P, et al. Training with inspiratory pressure support in patients with severe COPD. European Respiratory Journal. 2006; 27 (1): 65-72.</b> | RCT        | 1-     | 37 randomised; 29 completed | COPD patients; 40-75 years; FEV<60% predicted; 51entilator limitation to exercise capacity; resting PaO2>8kPa | Inspiratory pressure Support 10 (IPS10) cmH2O (training: 8 week cycling programme, 45 minutes three times a week). | Sham Inspiratory pressure Support 5 cmH2O (training: 8 week cycling programme, 45 minutes three times a week). | Pre and post training | ISW, SGRQ, Constant Load cycle endurance (75% of Wpeak) | Significantly higher training intensity in IPS10 group; change in ISW statistically significantly higher in IPS10 group (31+/-21m versus 13+/-31m); change in cycling endurance significantly higher in IPS10 group (7.4+/-5.4 versus 3.9+/-6.0 minutes); no change in SGRQ | Dutch Asthma Foundation |

Comments: Improvement in ISW unlikely to be clinically significant. Underpowered. No measurement of breathlessness. SGRQ unchanged. Apart from cycling, no other component generally seen in outpatient programme provided. However investigator made measurements blinded and patients used sham ventilator.

| Bibliographic citation                                                                                                                                                                                                                        | Study type                                                                             | Ev lev                      | Number patients                                                                            | Patient characteristics                                                                                                                              | Intervention                                                         | Comparison           | Length of follow up | Outcome measures                                                               | Effect size                                                                                                                                   | Source of funding                                                                                                                                               |
|-----------------------------------------------------------------------------------------------------------------------------------------------------------------------------------------------------------------------------------------------|----------------------------------------------------------------------------------------|-----------------------------|--------------------------------------------------------------------------------------------|------------------------------------------------------------------------------------------------------------------------------------------------------|----------------------------------------------------------------------|----------------------|---------------------|--------------------------------------------------------------------------------|-----------------------------------------------------------------------------------------------------------------------------------------------|-----------------------------------------------------------------------------------------------------------------------------------------------------------------|
| Vincent E, Sewell L, Wagg K, <i>et al.</i> , <b>Measuring a change in self-efficacy following pulmonary rehabilitation: an evaluation of the PRAISE tool.</b> CHEST. 2011; 140: 1534-9.                                                       | Detailed a reliability study and a prospective observational uncontrolled cohort study | 2+                          | 29 patients analysed for reliability study and 225 patients recruited to sensitivity study | Clinically stable COPD attending pulmonary rehabilitation                                                                                            | 7 week pulmonary rehabilitation programme attending 2 times per week | None                 | 7 weeks             | PRAISE score, MRC, ISWT                                                        | Change in PRAISE after pulmonary rehabilitation = 3.59, mean change in ISWT= 83.44 metres.                                                    | British Lung Foundation Project grant                                                                                                                           |
| <b>Comments:</b>                                                                                                                                                                                                                              |                                                                                        |                             |                                                                                            |                                                                                                                                                      |                                                                      |                      |                     |                                                                                |                                                                                                                                               |                                                                                                                                                                 |
| Bibliographic citation                                                                                                                                                                                                                        | Study type                                                                             | Ev lev                      | Number patients                                                                            | Patient characteristics                                                                                                                              | Intervention                                                         | Comparison           | Length of follow up | Outcome measures                                                               | Effect size                                                                                                                                   | Source of funding                                                                                                                                               |
| Vivodtzev I, Pépin JL, Vottero G, <i>et al.</i> <b>Improvement in quadriceps strength and dyspnoea in daily tasks after 1 month of electrical stimulation in severely deconditioned and malnourished COPD.</b> Chest. 2006; 129(6):1540-1548. | RCT                                                                                    | 1- (very select population) | 17                                                                                         | Severe COPD, FEV1 <50%, BMI <22, QMVC <50%, Endurance bike <5 minutes at 20W, Recent hospital stay requiring 1/12 inpatient rehab, Clinically stable | Usual rehabilitation + NMES                                          | Usual rehabilitation | 4 weeks             | Quality of life (MRF 28), 6MWT, quadriceps strength, muscle composition (n=11) | Improvement in quadriceps strength, No difference in walking (possibly underpowered), Improvement in dyspnoea in daily tasks domain of MRF 28 | Grants from the Association pour le Traitement, la Re'éducation et la Re'adaptation des Insuffisants Respiratoires (ATRIR), "Bourse Andre' Dion," Nyons, France |
| <b>Comments:</b>                                                                                                                                                                                                                              |                                                                                        |                             |                                                                                            |                                                                                                                                                      |                                                                      |                      |                     |                                                                                |                                                                                                                                               |                                                                                                                                                                 |
| Bibliographic citation                                                                                                                                                                                                                        | Study type                                                                             | Ev lev                      | Number patients                                                                            | Patient characteristics                                                                                                                              | Intervention                                                         | Comparison           | Length of follow up | Outcome measures                                                               | Effect size                                                                                                                                   | Source of funding                                                                                                                                               |

|                                                                                                                                                                                                                                                       |                        |            |                             |                                             |                                                                         |                                                                          |                           |                                                                                        |                                                                                                                                                                                                                                                                                                                                                                     |                                 |                   |
|-------------------------------------------------------------------------------------------------------------------------------------------------------------------------------------------------------------------------------------------------------|------------------------|------------|-----------------------------|---------------------------------------------|-------------------------------------------------------------------------|--------------------------------------------------------------------------|---------------------------|----------------------------------------------------------------------------------------|---------------------------------------------------------------------------------------------------------------------------------------------------------------------------------------------------------------------------------------------------------------------------------------------------------------------------------------------------------------------|---------------------------------|-------------------|
| <p>Vonbank K, Strasser B, Mondrzyk J <i>et al.</i> Strength training increases maximum working capacity in patients with COPD--randomized clinical trial comparing three training modalities.</p> <p>Respiratory Medicine (2012) 106(4), 557-563.</p> | RCT                    | 1+         | 43 randomised 36 completed  | Stable COPD mean FEV1% 55 mean age 60 years | Progressive strength training (ST) 2 x week 12 weeks                    | vs. endurance training (ET) and vs. combined strength and endurance (CT) | 12 week training period   | Cardiopulmonary exercise testing, FEV1, muscle strength, QOL                           | Muscle strength (leg press, bench press and bench pull) improved in all three training groups with a significant higher improvement in the ST ( mean (SD) 39.3 (27.7)%, 20.9 (19.8)%, 20.3 (10.3)% and the CT (43.3 (40.2)%, 18.1 (12.4)%, 21.6 (26.6%) compared to the ET alone 20.4 (32.3)%, 6.4 (16.3)%, 12.1 (15.5)%. no diff between groups for other outcomes | Austrian national research fund |                   |
| Comments                                                                                                                                                                                                                                              | Bibliographic citation | Study type | Ev lev                      | Number patients                             | Patient characteristics                                                 | Intervention                                                             | Comparison                | Length of follow up                                                                    | Outcome measures                                                                                                                                                                                                                                                                                                                                                    | Effect size                     | Source of funding |
| <p>Wadell K, Henriksson-Larsen K, Lundgren R. Physical training with and without oxygen in patients with chronic obstructive pulmonary disease and exercise-induced hypoxaemia. Journal of Rehabilitation Medicine.</p>                               | RCT                    | 1-         | 22 randomised, 20 completed | COPD by ERS criteria                        | 8 weeks of thrice weekly exercise with oxygen 5l/min via nasal cannulae | 8 weeks of thrice weekly exercise                                        | End of exercise programme | 6MWT; distance walked in training; venous pCO2; serum lactate; oxygen saturation; Borg | No difference                                                                                                                                                                                                                                                                                                                                                       | Charity and industry            |                   |

2001;33(5):200-205.

Comments: Single blind study. The small heterogeneous sample experienced a large training effect hence the study was underpowered to detect additional effects of oxygen supplementation

| Bibliographic citation                                                                                                                                                                                                     | Study type | Ev lev | Number patients                         | Patient characteristics                   | Intervention                                                                                                                                                 | Comparison                                       | Length of follow up | Outcome measures                       | Effect size                                                                                                                        | Source of funding      |
|----------------------------------------------------------------------------------------------------------------------------------------------------------------------------------------------------------------------------|------------|--------|-----------------------------------------|-------------------------------------------|--------------------------------------------------------------------------------------------------------------------------------------------------------------|--------------------------------------------------|---------------------|----------------------------------------|------------------------------------------------------------------------------------------------------------------------------------|------------------------|
| Wanke T, Formanek D, Lahrman H, <i>et al.</i> Effects of Combined Inspiratory Muscle Training and Cycle Ergometer Training on Exercise Performance in Patients with COPD. European Respiratory Journal. 1994; 7:2205-2211. | RCT        | 1-     | 42 total: 21 IMT & CET and 21 CET alone | COPD by usual definition (all severities) | 8 weeks. CET: 4 x week tailored exercise on cycle ergometer, IMT: extensive resistance training and endurance training using individualised threshold device | CET only. No sham, no peripheral muscle training | End of intervention | Inspiratory pressures, CPEX parameters | Multiple significant results with IMT versus CET: 15-20% greater increase in inspiratory pressures. 10% greater VO2max/Wmax /Vtmax | Austrian National Bank |

Comments: 18 of initial 60 dropped out but reasons not well covered and differential rate not given. Randomisation process not covered. Study not blinded. Most analyses are given versus baseline.

| Bibliographic citation                                                                                                                                                                                                                                                       | Study type | Ev lev | Number patients | Patient characteristics                                                                                                                                                                                                                                                                                                      | Intervention                                                                                                                                                                                                                                                                                           | Comparison                | Length of follow up | Outcome measures | Effect size                                                             | Source of funding |
|------------------------------------------------------------------------------------------------------------------------------------------------------------------------------------------------------------------------------------------------------------------------------|------------|--------|-----------------|------------------------------------------------------------------------------------------------------------------------------------------------------------------------------------------------------------------------------------------------------------------------------------------------------------------------------|--------------------------------------------------------------------------------------------------------------------------------------------------------------------------------------------------------------------------------------------------------------------------------------------------------|---------------------------|---------------------|------------------|-------------------------------------------------------------------------|-------------------|
| Waterhouse JC, Walters SJ, Oluboyede Y, Lawson RA <i>et al.</i> A randomised 2 x 2 trial of community versus hospital pulmonary rehabilitation for chronic obstructive pulmonary disease followed by telephone or conventional follow up. Health Technol Assess 2010; 14(6). | RCT        | 1++    | 240<br>4 groups | COPD diagnosis based on GOLD criteria<br>MRC 3 or worse<br>Clinically stable<br><br>Exclusion: inability to understand educational talks, prognosis of 2 years or less; LTOT or significant desaturation; musculoskeletal problems precluding exercise training; no access to phone; unstable / uncontrolled cardiac disease | 4 arms;<br>Community pulmonary rehabilitation plus phone call follow up;<br>Community pulmonary rehabilitation no phone call follow up;<br>Hospital pulmonary rehabilitation plus phone call follow up; hospital pulmonary rehabilitation no phone call follow up.<br><br>Here: phone call maintenance | No phone call maintenance | 18 months           | ESWT, SF-6D      | ESWT 56.9 (-25.2, 139)m, p=0.174<br><br>SF-6D 0.02 (0.04, 0.00), p=0.09 | HTA               |

Comments: Well-designed study exploring the value of community vs. hospital based rehabilitation. Second phase of study evaluated benefit of telephone call, no benefits identified in any outcomes.

| Bibliographic citation | Study type | Ev lev | Number patients | Patient characteristics | Intervention | Comparison | Length of follow up | Outcome measures | Effect size | Source of funding |
|------------------------|------------|--------|-----------------|-------------------------|--------------|------------|---------------------|------------------|-------------|-------------------|
|------------------------|------------|--------|-----------------|-------------------------|--------------|------------|---------------------|------------------|-------------|-------------------|

|                                                                                                                                                                                                                                                  |     |    |     |                                                                                                                                                                                                                                                                                                                       |              |                                                                                                                                                                                                       |                                 |                                                                                                                                                                                                                                                                                                |                                                                                                                                                                                                                                                                                                  |                                           |
|--------------------------------------------------------------------------------------------------------------------------------------------------------------------------------------------------------------------------------------------------|-----|----|-----|-----------------------------------------------------------------------------------------------------------------------------------------------------------------------------------------------------------------------------------------------------------------------------------------------------------------------|--------------|-------------------------------------------------------------------------------------------------------------------------------------------------------------------------------------------------------|---------------------------------|------------------------------------------------------------------------------------------------------------------------------------------------------------------------------------------------------------------------------------------------------------------------------------------------|--------------------------------------------------------------------------------------------------------------------------------------------------------------------------------------------------------------------------------------------------------------------------------------------------|-------------------------------------------|
| <b>Wedzicha JA, Bestall JC, Garrod R, et al. Randomised controlled trial of pulmonary rehabilitation in severe chronic obstructive disease patients, stratified with MRC dyspnoea scale. European Respiratory Journal. 1998; 12 (2):363-369.</b> | RCT | 1+ | 126 | Patients with COPD stratified into MRC 3-4 (n=66) and MRC 5 (n=60). Approximately half of overall group male. MRC 3-4 patients FEV1 approximately 0.98L; 37% predicted. MRC 5 patients FEV1 approximately 0.82L; 37% predicted. Each group (MRC 3-4 and MRC 5) randomised to exercise and education or education only | All subjects | 8 week pulmonary rehabilitation – 2 supervised exercise and education sessions/week (exercise group) vs. 2 education sessions/week (control). Outpatient exercise for MRC 3-4 and home exercise MRC 5 | End of pulmonary rehabilitation | Comparison of group response exercise (pulmonary rehabilitation and education) vs. control (education) in patients who completed. MRC 3-4: 29 completed exercise vs. 27 control. MRC 5: 26 completed exercise vs. 28 control. Outcome measures exercise capacity (ISWT), HRQOL (SGRQ and CRDQ) | MRC 3-4 patients improved ISWT 88m with exercise significantly more than - 16m control. Also significant improvement CRDQ 14 exercise vs. 6 control. No difference SGRQ between groups. MRC 5 subjects showed no significant improvement ISWT, CRDQ or SGRQ in either exercise or control groups | UK NHS Research and Development programme |
|--------------------------------------------------------------------------------------------------------------------------------------------------------------------------------------------------------------------------------------------------|-----|----|-----|-----------------------------------------------------------------------------------------------------------------------------------------------------------------------------------------------------------------------------------------------------------------------------------------------------------------------|--------------|-------------------------------------------------------------------------------------------------------------------------------------------------------------------------------------------------------|---------------------------------|------------------------------------------------------------------------------------------------------------------------------------------------------------------------------------------------------------------------------------------------------------------------------------------------|--------------------------------------------------------------------------------------------------------------------------------------------------------------------------------------------------------------------------------------------------------------------------------------------------|-------------------------------------------|

**Comments: Patients who are severely dyspnoeic and housebound with breathlessness (MRC 5) fail to gain benefit from 8 week home exercise programme whereas patients with moderate dyspnoea (MRC 3-4) improve exercise capacity and 1 measure of health related quality of life after outpatient pulmonary rehabilitation.**

| Bibliographic citation                                                                                                                                        | Study type | Ev lev | Number patients                                                                                | Patient characteristics      | Intervention                                                                                                                                                                                                      | Comparison                                                                     | Length of follow up | Outcome measures                            | Effect size                                                                                    | Source of funding |
|---------------------------------------------------------------------------------------------------------------------------------------------------------------|------------|--------|------------------------------------------------------------------------------------------------|------------------------------|-------------------------------------------------------------------------------------------------------------------------------------------------------------------------------------------------------------------|--------------------------------------------------------------------------------|---------------------|---------------------------------------------|------------------------------------------------------------------------------------------------|-------------------|
| <b>Weiner P, Azgad Y, Ganam R. Inspiratory muscle training combined with general exercise reconditioning in patients with COPD. Chest. 1992; 102:1351-56.</b> | RCT        | 1-     | 36 total: 12 IMT & general exercise reconditioning; 12 general exercise reconditioning; 12 nil | "Chronic airflow limitation" | 6 months. IMT: threshold device increased toward 80% Pimax, frequency of use unclear; General exercise reconditioning: cycling then rowing then weights, frequency unclear. Sham IMT was used in general exercise | "No intervention" group did not have sham IMT or other contact. ?standard care | End of intervention | Pimax; respiratory muscle endurance; 12 MWT | 200m mean increase in GENERAL EXERCISE RECONDITIONING and IMT group, no change in other groups | Not stated.       |

reconditioning group.

Comments: Not truly randomly assigned - a matching process is described. Control group poorly described.

| Bibliographic citation                                                                                                                                                                                                    | Study type | Ev lev | Number patients | Patient characteristics          | Intervention | Comparison                                                          | Length of follow up | Outcome measures | Effect size                                                                                                               | Source of funding                                        |
|---------------------------------------------------------------------------------------------------------------------------------------------------------------------------------------------------------------------------|------------|--------|-----------------|----------------------------------|--------------|---------------------------------------------------------------------|---------------------|------------------|---------------------------------------------------------------------------------------------------------------------------|----------------------------------------------------------|
| White RJ, Rudkin S, Harrison S, <i>et al.</i> Pulmonary rehabilitation compared with brief advice given for severe chronic obstructive pulmonary disease. Journal of Cardiopulmonary Rehabilitation. 2002; 22(5): 338-44. | RCT        | 1+     | 103 patients    | Moderate to severe (stable) COPD | Exercise     | Hospital based pulmonary rehabilitation home vs. brief intervention | 3 months            | CRDQ & ISWT      | Both intervention groups improved at 3 months. CRDQ (D) weeks difference =0.4 (p>0.05)) ISWT difference = 34.1m (p<0.05). | Funding Academic Institution (Frenchay Respiratory Fund) |

Comments: Power calculation assumed superiority, probably underpowered, outcome assessment blinded.

| Bibliographic citation                                                                                                                                                                                                            | Study type | Ev lev | Number patients          | Patient characteristics                                                 | Intervention                               | Comparison                                                     | Length of follow up | Outcome measures | Effect size                    | Source of funding                                                   |
|-----------------------------------------------------------------------------------------------------------------------------------------------------------------------------------------------------------------------------------|------------|--------|--------------------------|-------------------------------------------------------------------------|--------------------------------------------|----------------------------------------------------------------|---------------------|------------------|--------------------------------|---------------------------------------------------------------------|
| Wijkstra PJ, Ten Vergent EM, van Altena R, <i>et al.</i> Long term benefits of rehabilitation at home on quality of life and exercise tolerance in patients with chronic obstructive pulmonary disease. Thorax. 1995; 50:824-828. | Pilot RCT  | 1-     | 45. 33 completed. 3 arms | Diagnosed COPD. FEV1 <60% predicted; post bronchodilator FEV1/IVC < 50% | Maintenance strategies post rehabilitation | Control (no intervention including no original rehabilitation) | 18 months           | QOL: CRDQ        | Mean difference not described. | Nederlands Astma Fonds (89.29) and the Foundation Astmabestrijding. |

Comment: The authors concluded that after a 3 month course of rehabilitation benefits were observed in the groups that had either weekly or monthly supervised rehabilitation sessions.

The sample size for each of the three groups was very small (n=11,12 & 13 for each of the three groups weekly, monthly and control respectively). Not blinded, mean differences between groups not described.

6MWT compared to baseline and not between groups. Assume same study as Wijkstra 1996.

| Bibliographic citation                                                                         | Study type | Ev lev | Number patients          | Patient characteristics     | Intervention                                               | Comparison                                              | Length of follow up | Outcome measures                                   | Effect size                                              | Source of funding                                      |
|------------------------------------------------------------------------------------------------|------------|--------|--------------------------|-----------------------------|------------------------------------------------------------|---------------------------------------------------------|---------------------|----------------------------------------------------|----------------------------------------------------------|--------------------------------------------------------|
| Wijkstra P J, van der Mark TW, Kraan J, <i>et al.</i> Long term effects of home rehabilitation | Pilot RCT  | 1-     | 45. 33 completed. 3 arms | Confirmed diagnosis of COPD | Maintenance 1/week; 1/ month following intensive pulmonary | Control arm who had no initial pulmonary rehabilitation | 18 months           | Wmax; lung function, 6MWD and inspiratory muscles. | Mean difference not described for WMax. Stated to not be | Nederlands Astma Fonds and Foundation Astmabestrijding |

on physical performance in chronic obstructive pulmonary disease. Am. J. Resp. Crit. Care. Med. 1996; 153:1234-41.

rehabilitation n

significantly different between groups.

**Comments:** The authors concluded that after a 3 month course of pulmonary rehabilitation benefits were observed in the groups that had either weekly or monthly supervised pulmonary rehabilitation sessions. The sample size for each of the three groups was very small (n=11,12 & 13 for each of the three groups weekly, monthly and control respectively). No power calculation reported. Blinding not documented.

| Bibliographic citation                                                                                                                                                                       | Study type | Ev lev | Number patients | Patient characteristics                                                                                                                                                                                                 | Intervention | Comparison                                                              | Length of follow up | Outcome measures                                                                                 | Effect size                                                                                                                                                                                  | Source of funding |
|----------------------------------------------------------------------------------------------------------------------------------------------------------------------------------------------|------------|--------|-----------------|-------------------------------------------------------------------------------------------------------------------------------------------------------------------------------------------------------------------------|--------------|-------------------------------------------------------------------------|---------------------|--------------------------------------------------------------------------------------------------|----------------------------------------------------------------------------------------------------------------------------------------------------------------------------------------------|-------------------|
| Withers NJ, Rudkin ST, White RJ. Anxiety and Depression in Severe Chronic Obstructive Pulmonary Disease: The Effects of Pulmonary Rehabilitation. J Cardiopulm Rehabil. 1999; 19(6):362-365. | Cohort     | 3      | 95              | 62 male and 33 female patients with COPD (FEV1 0.8(0.31)L). Anxiety and depression defined using the Hospital Anxiety and Depression Questionnaire with scores of 10+ indication a high level of anxiety and depression | All subjects | 6 week outpatient pulmonary rehabilitation with 3 hour sessions 2x/week | NA                  | Comparison of improvement in ISWT in patients with/without high level of anxiety and depression. | Similar improvement in ISWD in patients with (30m) and without (25m) high depression score. Greater improvement in ISWD in patients with (50m) vs. without (20m) high anxiety score (p<0.05) | Not stated        |

**Comments:** COPD patients with high HAD anxiety and depression scores gain similar or greater improvement in walking distance compared to patients with normal scores

| Bibliographic citation                                                                                                                                                  | Study type  | Ev lev | Number patients | Patient characteristics                                                 | Intervention | Comparison                                                   | Length of follow up | Outcome measures                                                                                                              | Effect size                                                                                                                                                                     | Source of funding |
|-------------------------------------------------------------------------------------------------------------------------------------------------------------------------|-------------|--------|-----------------|-------------------------------------------------------------------------|--------------|--------------------------------------------------------------|---------------------|-------------------------------------------------------------------------------------------------------------------------------|---------------------------------------------------------------------------------------------------------------------------------------------------------------------------------|-------------------|
| Young P, Dewse M, Fergusson W, Kolbe J. Respiratory rehabilitation in chronic obstructive pulmonary disease: predictors of nonadherence. Eur Respir J 1999 13: 855-859. | Qualitative | 3      | 91              | 50-55% male patients with COPD (FEV1 34(13)% predicted, mean FEV1 0.9L) | All subjects | Subjects completed 4 week pulmonary rehabilitation programme | NA                  | Completion rate defined as those referred to pulmonary rehabilitation who agreed to attend and completed the 4 week programme | A lower proportion of non-smokers (8%) completed the programme than non-smokers (28%, p<0.02). Current smokers had odds of 0.3 (0.1-0.9) of pulmonary rehabilitation completion | Not stated        |

**Comments:** Completion rate was good in both groups but fewer current smokers completed pulmonary rehabilitation programme

| Bibliographic citation                                                                                                                                                                                | Study type    | Ev lev | Number patients                                         | Patient characteristics                       | Intervention                 | Comparison        | Length of follow up | Outcome measures                                                                                                                                                                                                                                                 | Effect size                                                                                                                                                                                                                                                      | Source of funding                        |
|-------------------------------------------------------------------------------------------------------------------------------------------------------------------------------------------------------|---------------|--------|---------------------------------------------------------|-----------------------------------------------|------------------------------|-------------------|---------------------|------------------------------------------------------------------------------------------------------------------------------------------------------------------------------------------------------------------------------------------------------------------|------------------------------------------------------------------------------------------------------------------------------------------------------------------------------------------------------------------------------------------------------------------|------------------------------------------|
| Zainuldin R, Mackey MG, Alison JA. Optimal intensity and type of leg exercise training for people with chronic obstructive pulmonary disease (Review). The Cochrane Collaboration. 2011; Issue 9(11). | Meta-analysis | 1++    | Eight included studies were analysed (367 participants) | COPD patients defined by FEV1/FVC ratio < 0.7 | Continuous exercise training | Interval training | 12 sessions or more | Primary outcomes were at peak exercise (peak work rate, peak oxygen consumption, peak minute ventilation and lactate threshold), at isowork or isotime, endurance time on a constant work rate test and functional exercise capacity (six-minute walk distance). | When comparing continuous and interval training, there were no significant differences in any of the primary outcomes, except for oxygen consumption at isotime (MD 0.08; 95% CI 0.01 to 0.16) but the treatment effect was not considered clinically important. | Cochrane airways collaboration- unfunded |

Comments:



# Title: The British Thoracic Society Guideline on Pulmonary Rehabilitation in Adults

## Short Title: BTS Pulmonary Rehabilitation Guideline

### Web Appendix 4 - ABBREVIATIONS FOR EVIDENCE TABLES

|                   |                                                        |
|-------------------|--------------------------------------------------------|
| 6MWT              | 6 minute walk test                                     |
| 6MWD              | 6 minute walk distance                                 |
| 12MWD             | 12 minute walk distance                                |
| 12MWT             | 12 minute walk test                                    |
| ABG               | Arterial blood gases                                   |
| ADL               | Activities of daily living                             |
| AQ20              | Airways questionnaire 20                               |
| ATS               | American Thoracic Society                              |
| BDI               | Baseline dyspnoea index                                |
| BiPAP             | Bilevel positive airway pressure                       |
| BMI               | Body mass index                                        |
| BPQ               | Breathing problems questionnaire                       |
| BTS               | British Thoracic Society                               |
| CBT               | Cognitive behavioural therapy                          |
| CES-D             | Centre for epidemiologic studies depression scale      |
| CET               | Cycle ergometry training                               |
| CHF               | Chronic heart failure                                  |
| COPD              | Chronic obstructive pulmonary disease                  |
| CPE               | Cardiopulmonary exercise                               |
| CPEX              | Cardiopulmonary exercise testing                       |
| CRDQ              | Chronic respiratory disease questionnaire              |
| CRF               | Chronic respiratory failure                            |
| CRP               | C reactive protein                                     |
| CSES-D            | Center for Epidemiologic Studies Depression Scale      |
| CSES              | COPD self efficacy scale                               |
| CT                | Combined training                                      |
| DHA               | Docosahexaenoic acid                                   |
| DNA               | Did not attend                                         |
| EAA               | Essential amino acids                                  |
| EPA               | Eicosapentaenoic acid                                  |
| EPAP              | Expiratory pressure levels                             |
| ERS               | European Respiratory Society                           |
| ESWT              | Endurance shuttle walk test                            |
| ET                | Endurance training                                     |
| ETCO <sub>2</sub> | End tidal CO <sub>2</sub>                              |
| ETA               | Exercise training alone                                |
| ETLS              | Exercise training plus lecture series                  |
| ETAT              | Exercise training plus activity training               |
| FEV <sub>1</sub>  | Forced expiratory volume in 1 second                   |
| FFM               | Fat free mass                                          |
| FFMI              | Fat free mass index                                    |
| FM                | Fat mass                                               |
| FVC               | Forced vital capacity                                  |
| GEP               | Generalised exercise programme                         |
| GER               | General exercise reconditioning                        |
| GOLD              | Global initiative for chronic obstructive lung disease |
| HADS              | Hospital anxiety and depression score                  |

|                   |                                                         |
|-------------------|---------------------------------------------------------|
| HAM-A             | Hamilton anxiety rating scale                           |
| HAM-D             | Hamilton depression rating scale                        |
| HRCT              | High resolution computed tomography                     |
| HRQOL             | Health related quality of life                          |
| ICS               | Inhaled corticosteroids                                 |
| IHD               | Ischaemic heart disease                                 |
| ILD               | Interstitial lung disease                               |
| IL6               | Inter leukin 6                                          |
| IM                | Intermuscular                                           |
| IMT               | Inspiratory muscle training                             |
| IPAP              | Inspiratory pressure levels                             |
| IPF               | Idiopathic pulmonary fibrosis                           |
| IPS10             | Inspiratory pressure support 10                         |
| IQR               | Interquartile range                                     |
| ISWT              | Incremental shuttle walk test                           |
| ITEP              | Individually targeted exercise programme                |
| ITT               | Intention to treat                                      |
| IVC               | Inspiratory vital capacity                              |
| LABA              | Long acting beta agonist                                |
| LAP               | Lifestyle activity programme                            |
| LCADL             | London chest activity of daily living scale             |
| LGT               | Low intensity general training group                    |
| LTOT              | Long term oxygen therapy                                |
| MIP               | Maximum inspiratory pressure                            |
| MRC               | Medical research council scale                          |
| Mw                | Weighed mean                                            |
| MRF28             | Maugeri respiratory failure questionnaire               |
| ND                | Nandrolone decanoate                                    |
| NIV               | Non invasive ventilation                                |
| NIVS              | Noninvasive ventilator support                          |
| NMES              | Neuromuscular electrical stimulation                    |
| NNT               | Number needed to treat                                  |
| NS                | Non significant                                         |
| O <sub>2</sub>    | Oxygen                                                  |
| PAIS-SR           | Psychosocial adjustment to illness scale-self report    |
| PaCO <sub>2</sub> | Partical pressure of carbon dioxide                     |
| PaO <sub>2</sub>  | Partial pressure of oxygen                              |
| PFSDQ             | Pulmonary functional status and dsypnoea questionnaire  |
| PeMax             | Maximal expiratory mouth pressure                       |
| PiMAX             | Maximal inspiratory mouth pressure                      |
| PRAISE            | Pulmonary rehabilitation adapted index of self efficacy |
| PUFA              | Polyunsaturated fatty acid                              |
| RM                | Repitition maximum test                                 |
| MVC               | Maximal voluntary contraction                           |
| QOL               | Quality of life                                         |
| RCT               | Randomised controlled trial                             |
| SCL-90R           | Symptom checklist 90R                                   |
| SF-36             | Short form 36                                           |
| SGRQ              | St Georges respiratory questionnaire                    |
| SMD               | Standardised mean difference                            |
| SOB               | Shortness of breath                                     |
| SpO <sub>2</sub>  | Saturation of peripheral oxygen                         |
| SPPB              | Short physical performance battery                      |
| ST                | Strength training group                                 |

|                     |                               |
|---------------------|-------------------------------|
| STAI                | State trait anxiety inventory |
| SWT                 | Shuttle walk test             |
| TDI                 | Transition dyspnoea index     |
| TET                 | Traditional exercise training |
| TNF                 | Tumour necrosis factor        |
| VAS                 | Visual analogue scale         |
| VO <sub>2</sub> max | Maximal oxygen consumption    |
